# Supplementary material for: Is aromaticity loss necessary for transition-metal promoted arene–alkene cycloadditions?
Source: Royal Society of Chemistry journal article supplement (doi:10.1039/d4sc05337k), 2024-01-01
Supplement: d4sc05337k1.pdf [file d4sc05337k1.pdf]

# Is Aromaticity Loss Necessary for Transition-Metal Promoted Arene-Alkene Cycloadditions?

João V. Schober,\* Croix J. Laconsay and Judy I. Wu\*  
Department of Chemistry, University of Houston, Houston, TX 77204

## Table of Contents

|                                                                                                                                                                                                                                                                                                                                                                                                                                          |    |
|------------------------------------------------------------------------------------------------------------------------------------------------------------------------------------------------------------------------------------------------------------------------------------------------------------------------------------------------------------------------------------------------------------------------------------------|----|
| 1. Computed activation free energies for <i>endo</i> vs. <i>exo</i> reactions                                                                                                                                                                                                                                                                                                                                                            | 2  |
| Table S1. Computed activation free energies (kcal/mol) for <i>endo</i> and <i>exo</i> pathways at $\omega$ B97X-D/def2-TZVPP// $\omega$ B97X-D/def2-SVP.                                                                                                                                                                                                                                                                                 | 2  |
| Table S2. Computed activation free energies (kcal/mol) for <i>endo</i> and <i>exo</i> pathways at DLPNO-CCSD(T)/def2-TZVPP// $\omega$ B97X-D/def2-SVP.                                                                                                                                                                                                                                                                                   | 3  |
| 2. Benchmark studies                                                                                                                                                                                                                                                                                                                                                                                                                     | 4  |
| Figure S1. Reaction selected for benchmark study (cf. Figure 3c in main text).                                                                                                                                                                                                                                                                                                                                                           | 4  |
| Table S3. Activation free energy barriers ( $\Delta G^\ddagger$ ) and relative free energies between the $\sigma$ -complex and product ( $\Delta G$ ) computed with selected functionals with the def2-TZVPP basis set and benchmarked against results at the DLPNO-CCSD(T)/def2-TZVPP level. All structures were optimized at the $\omega$ B97X-D/def2-SVP level.                                                                       | 4  |
| 3. Additional schemes                                                                                                                                                                                                                                                                                                                                                                                                                    | 5  |
| Figure S2. Diels–Alder reaction of 7 with NMM.                                                                                                                                                                                                                                                                                                                                                                                           | 5  |
| Figure S3. Computed reaction profiles for Diels–Alder reactions for benzene with bis(trifluoromethyl)tetrazine, 11 with cyclopentadiene, and 11 with bis(trifluoromethyl)tetrazine at $\omega$ B97X-D/def2-TZVPP// $\omega$ B97X-D/def2-SVP. Single-point energies at DLPNO-CCSD(T)/def2-TZVPP// $\omega$ B97X-D/def2-SVP are shown in parenthesis. All reaction barriers are computed relative to a $\sigma$ -complex of the reactants. | 6  |
| Table S4. Computed HOMA values for relevant compounds.                                                                                                                                                                                                                                                                                                                                                                                   | 7  |
| 4. Optimized Cartesian coordinates for arenes and complexed arenes                                                                                                                                                                                                                                                                                                                                                                       | 8  |
| 5. Optimized Cartesian coordinates for $\sigma$ -complexes, transition state structures, and products                                                                                                                                                                                                                                                                                                                                    | 28 |

## 1. Computed activation free energies for *endo* vs. *exo* reactions

**Table S1.** Computed activation free energies (kcal/mol) for *endo* and *exo* pathways at  $\omega$ B97X-D/def2-TZVPP// $\omega$ B97X-D/def2-SVP.

| Reactants                                 | Product     | $\Delta G^\ddagger$ | $\Delta G_{prod}$ |
|-------------------------------------------|-------------|---------------------|-------------------|
| Benzene + cyclopentadiene                 | <i>endo</i> | 48.3                | 21.0              |
|                                           | <i>exo</i>  | 46.8                | 20.2              |
| <i>p</i> -nitroaniline + cyclopentadiene  | <i>endo</i> | 41.0                | 13.4              |
|                                           | <i>exo</i>  | 41.1                | 14.3              |
| <b>1</b> + NMN                            | <i>endo</i> | 25.2                | -14.3             |
|                                           | <i>exo</i>  | 22.9                | -14.9             |
| <b>2</b> + NMN                            | <i>endo</i> | 26.3                | -11.7             |
|                                           | <i>exo</i>  | 23.3                | -13.6             |
| <b>3</b> + NMN                            | <i>endo</i> | 32.8                | -8.2              |
|                                           | <i>exo</i>  | -- <sup>a</sup>     | -- <sup>a</sup>   |
| Benzene + NMN                             | –           | 38.3                | 9.5               |
| <b>7'</b> + NMN                           | <i>endo</i> | 13.4                | -36.3             |
|                                           | <i>exo</i>  | 10.6                | -38.4             |
| <b>16</b> + NMN                           | <i>endo</i> | 31.0                | -8.2              |
|                                           | <i>exo</i>  | 31.3                | -6.6              |
| <b>14</b> + bis(trifluoromethyl)tetrazine | –           | 14.7                | -25.9             |
| <b>14</b> + cyclopentadiene               | <i>endo</i> | 29.2                | -16.9             |
|                                           | <i>exo</i>  | 32.6                | -17.8             |
| <b>11</b> + cyclopentadiene               | <i>endo</i> | 27.7                | -15.4             |
|                                           | <i>exo</i>  | 31.4                | -15.3             |
| <b>11</b> + bis(trifluoromethyl)tetrazine | –           | 15.3                | -20.9             |
| <b>11</b> + Danishefsky diene             | <i>endo</i> | 31.4                | -21.0             |
|                                           | <i>exo</i>  | 32.4                | -24.7             |

<sup>a</sup> Geometry optimization did not lead to a sigma complex.

**Table S2.** Computed activation free energies (kcal/mol) for *endo* and *exo* pathways at DLPNO-CCSD(T)/def2-TZVPP// $\omega$ B97X-D/def2-SVP.

| <b>Reactants</b>                          | <b>Product</b> | $\Delta G^\ddagger$ | $\Delta G_{prod}$ |
|-------------------------------------------|----------------|---------------------|-------------------|
| Benzene + cyclopentadiene                 | <i>endo</i>    | 44.0                | 17.2              |
|                                           | <i>exo</i>     | 42.4                | 16.4              |
| <i>p</i> -nitroaniline + cyclopentadiene  | <i>endo</i>    | 37.8                | 11.1              |
|                                           | <i>exo</i>     | 37.2                | 12.0              |
| <b>1</b> + NMN                            | <i>endo</i>    | 21.7                | -15.4             |
|                                           | <i>exo</i>     | 19.7                | -15.5             |
| <b>2</b> + NMN                            | <i>endo</i>    | 23.1                | -12.4             |
|                                           | <i>exo</i>     | 23.4                | -10.6             |
| <b>3</b> + NMN                            | <i>endo</i>    | 25.4                | -7.7              |
|                                           | <i>exo</i>     | -- <sup>a</sup>     | -- <sup>a</sup>   |
| Benzene + NMN                             | –              | 34.0                | 6.1               |
| <b>7'</b> + NMN                           | <i>endo</i>    | 10.5                | -35.8             |
|                                           | <i>exo</i>     | 7.5                 | -37.3             |
| <b>16</b> + NMN                           | <i>endo</i>    | 27.0                | -9.9              |
|                                           | <i>exo</i>     | 27.9                | -9.8              |
| <b>14</b> + bis(trifluoromethyl)tetrazine | –              | 11.1                | -30.6             |
| <b>14</b> + cyclopentadiene               | <i>endo</i>    | 26.2                | -18.1             |
|                                           | <i>exo</i>     | 29.2                | -19.1             |
| <b>11</b> + cyclopentadiene               | <i>endo</i>    | 24.8                | -17.8             |
|                                           | <i>exo</i>     | 28.7                | -18.1             |
| <b>11</b> + bis(trifluoromethyl)tetrazine | –              | 11.2                | -26.7             |
| <b>11</b> + Danishefsky diene             | <i>endo</i>    | 29.5                | -22.0             |
|                                           | <i>exo</i>     | 30.6                | -26.1             |

<sup>a</sup> Geometry optimization did not lead to a sigma complex.

## 2. Benchmark studies

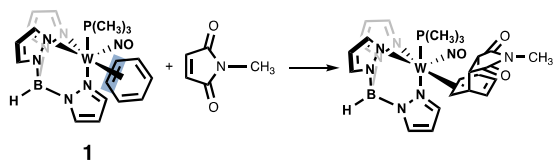

**Figure S1.** Reaction selected for benchmark study (cf. Figure 3c in main text).

Gibbs free energies were computed based on the sum of total electronic energy of the selected functional with a def2-TZVPP basis set and free energy correction terms at the  $\omega$ B97X-D/def2-SVP level. All structures were optimized at the  $\omega$ B97X-D/def2-SVP level. Single-point energies calculated at the  $\omega$ B97X-D, PW6B95, M06, M06-L, MN15, and PBE0-D3/def2-TZVPP levels were benchmarked against results at the DLPNO-CCSD(T)/def2-TZVPP level. Computed free energy barriers ( $\Delta G^\ddagger$ ) for all functionals are all within ca.  $\pm 3$  kcal/mol compared to data computed at DLPNO-CCSD(T)/def2-TZVPP (19.7 kcal/mol). Computed relative free energies ( $\Delta G$ ) for  $\omega$ B97X-D, MN15, and PBE0-D3 are within ca.  $\pm 1$  kcal/mol compared to data computed at DLPNO-CCSD(T)/def2-TZVPP ( $-15.5$  kcal/mol); PW6B95, M06, M06-L gave large discrepancies. Since results at the  $\omega$ B97X-D/def2-TZVPP level are in close agreement with DLPNO-CCSD(T)/def2-TZVPP data, the  $\omega$ B97X-D functional was selected for the study here.

**Table S3.** Activation free energy barriers ( $\Delta G^\ddagger$ ) and relative free energies between the  $\sigma$ -complex and product ( $\Delta G$ ) computed with selected functionals with the def2-TZVPP basis set and benchmarked against results at the DLPNO-CCSD(T)/def2-TZVPP level. All structures were optimized at the  $\omega$ B97X-D/def2-SVP level.

| Level of Theory      | $\Delta G^\ddagger$ , kcal mol <sup>-1</sup> | $\Delta G$ , kcal mol <sup>-1</sup> |
|----------------------|----------------------------------------------|-------------------------------------|
| $\omega$ B97X-D      | 22.9                                         | -14.9                               |
| PW6B95               | 21.0                                         | -9.1                                |
| M06                  | 23.1                                         | -9.7                                |
| M06-L                | 24.4                                         | -1.7                                |
| MN15                 | 21.3                                         | -12.4                               |
| PBE0-D3              | 16.8                                         | -16.3                               |
| <b>DLPNO-CCSD(T)</b> | <b>19.7</b>                                  | <b>-15.5</b>                        |

### 3. Additional schemes

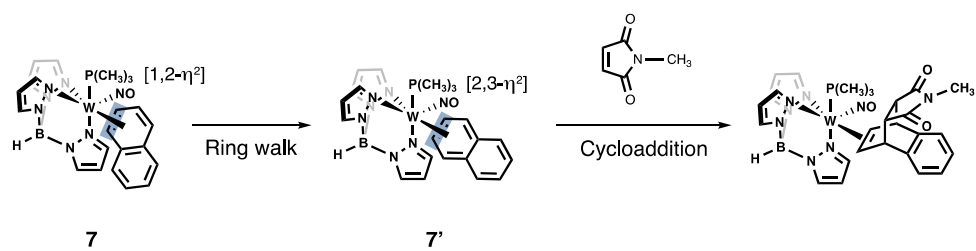

**Figure S2.** Diels–Alder reaction of **7** with NMM.

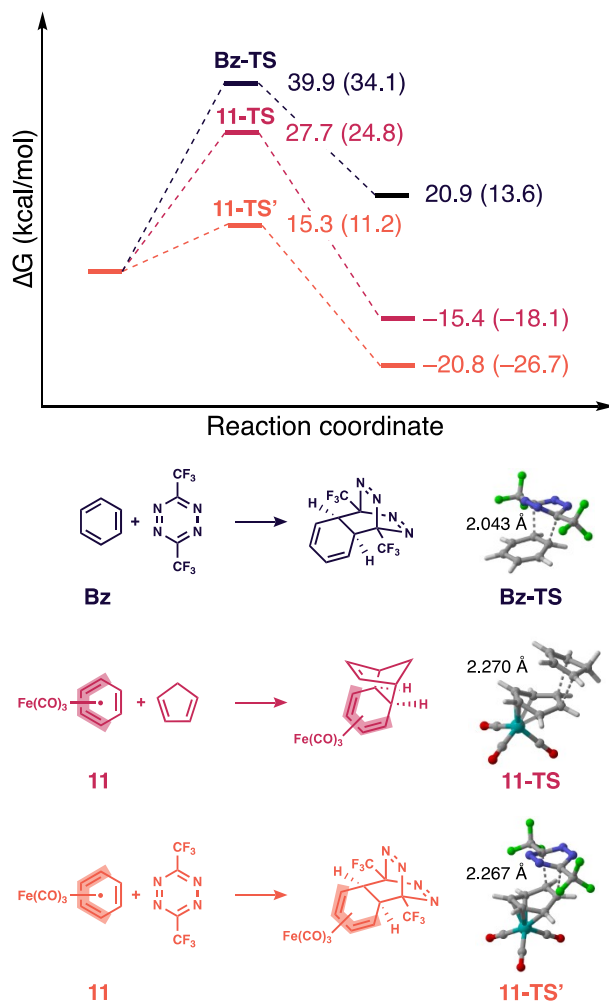

**Figure S3.** Computed reaction profiles for Diels–Alder reactions for benzene with bis(trifluoromethyl)tetrazine, **11** with cyclopentadiene, and **11** with bis(trifluoromethyl)tetrazine at  $\omega\text{B97X-D}/\text{def2-TZVPP}/\omega\text{B97X-D}/\text{def2-SVP}$ . Single-point energies at  $\text{DLPNO-CCSD(T)}/\text{def2-TZVPP}/\omega\text{B97X-D}/\text{def2-SVP}$  are shown in parenthesis. All reaction barriers are computed relative to a  $\sigma$ -complex of the reactants.

**Table S4.** Computed HOMA values for relevant compounds.

| Compound               | rHOMA                           |
|------------------------|---------------------------------|
| Benzene                | 1.0                             |
| Naphthalene            | 0.782                           |
| Aniline                | 0.969                           |
| Nitrobenzene           | 0.992                           |
| <i>p</i> -Nitroaniline | 0.950                           |
| 1                      | 0.139                           |
| 2                      | 0.286                           |
| 3                      | 0.632                           |
| 4                      | 0.064                           |
| 5                      | 0.363                           |
| 6                      | 0.800                           |
| 7                      | Ring A: -0.042<br>Ring B: 0.941 |
| 7'                     | Ring A: 0.282<br>Ring B: 0.303  |
| 8                      | Ring A: 0.061<br>Ring B: 0.936  |
| 8'                     | Ring A: 0.434<br>Ring B: 0.379  |
| 9                      | -0.350                          |
| 10                     | -0.297                          |
| 11                     | -0.124                          |
| 12                     | 0.059                           |
| 13                     | -0.181                          |
| 14                     | -0.509                          |
| 15                     | 0.844                           |
| 16                     | Ring A: 0.636<br>Ring B: 0.699  |

#### 4. Optimized Cartesian coordinates for arenes and complexed arenes

**Benzene**

|   |         |          |          |
|---|---------|----------|----------|
| C | 2.17834 | -2.52135 | -0.14102 |
| C | 3.57336 | -2.52140 | -0.14045 |
| C | 4.27086 | -1.31349 | -0.14120 |
| C | 3.57340 | -0.10533 | -0.14210 |
| C | 2.17859 | -0.10528 | -0.14249 |
| C | 1.48099 | -1.31336 | -0.14210 |
| H | 1.63238 | -3.46707 | -0.14065 |
| H | 4.11923 | -3.46719 | -0.13972 |
| H | 5.36285 | -1.31339 | -0.14095 |
| H | 4.11959 | 0.84025  | -0.14256 |
| H | 1.63252 | 0.84038  | -0.14331 |
| H | 0.38898 | -1.31320 | -0.14245 |

Electronic energy (a.u.) at  $\omega$ B97X-D/def2-SVP: -232.0014242

Number of imaginary frequencies: 0

**Naphthalene**

|   |          |          |          |
|---|----------|----------|----------|
| C | -3.91613 | -0.81590 | 0.00033  |
| C | -2.54302 | -0.81391 | 0.00014  |
| C | -1.81624 | 0.40869  | 0.00024  |
| C | -2.53662 | 1.63898  | 0.00052  |
| C | -3.95849 | 1.60343  | 0.00069  |
| C | -4.63216 | 0.40694  | 0.00061  |
| H | 0.15568  | -0.50029 | -0.00016 |
| H | -4.46243 | -1.76162 | 0.00027  |
| H | -1.98848 | -1.75580 | -0.00007 |
| C | -0.39436 | 0.44424  | 0.00006  |
| C | -1.80984 | 2.86159  | 0.00060  |
| H | -4.50854 | 2.54796  | 0.00091  |
| H | -5.72424 | 0.39331  | 0.00075  |
| C | -0.43673 | 2.86357  | 0.00042  |
| C | 0.27929  | 1.64073  | 0.00016  |
| H | -2.36439 | 3.80348  | 0.00081  |
| H | 0.10958  | 3.80929  | 0.00049  |
| H | 1.37138  | 1.65438  | 0.00001  |

Electronic energy (a.u.) at  $\omega$ B97X-D/def2-SVP: -385.4832425

Number of imaginary frequencies: 0

**Indole**

|   |          |          |          |
|---|----------|----------|----------|
| C | 0.82181  | -0.03127 | 0.06505  |
| C | -0.55792 | -0.35225 | 0.00713  |
| C | -1.54527 | 0.62669  | -0.16509 |
| C | -1.12854 | 1.94372  | -0.27966 |



|   |          |          |          |
|---|----------|----------|----------|
| C | 0.23887  | 2.28560  | -0.22483 |
| C | 1.21236  | 1.31450  | -0.05432 |
| C | 1.52921  | -1.27006 | 0.24658  |
| C | 0.58616  | -2.26026 | 0.29039  |
| H | -2.60441 | 0.36332  | -0.20770 |
| H | -1.87276 | 2.73163  | -0.41490 |
| H | 0.53021  | 3.33393  | -0.31872 |
| H | 2.26926  | 1.58753  | -0.01287 |
| H | 2.60441  | -1.40535 | 0.33343  |
| H | -1.53378 | -2.23329 | 0.14500  |
| N | -0.66855 | -1.71473 | 0.14715  |
| H | 0.71074  | -3.33393 | 0.41490  |

Electronic energy (a.u.) at  $\omega$ B97X-D/def2-SVP: -363.4394936  
Number of imaginary frequencies: 0

#### Aniline

|   |          |          |          |
|---|----------|----------|----------|
| C | 2.82260  | 0.00000  | 0.00000  |
| C | 2.11246  | 1.20040  | 0.00019  |
| C | 0.72094  | 1.20635  | 0.00017  |
| C | 0.00000  | 0.00000  | 0.00000  |
| C | 0.72098  | -1.20635 | -0.00006 |
| C | 2.11251  | -1.20040 | 0.00000  |
| H | 3.91398  | 0.00016  | -0.00073 |
| H | 2.64906  | 2.15228  | -0.00049 |
| H | 0.17866  | 2.15578  | 0.00422  |
| H | 0.17873  | -2.15580 | 0.00397  |
| H | 2.64892  | -2.15238 | -0.00099 |
| N | -1.38504 | -0.00011 | 0.04686  |
| H | -1.84388 | 0.84311  | -0.27154 |
| H | -1.84358 | -0.84370 | -0.27103 |

Electronic energy (a.u.) at  $\omega$ B97X-D/def2-SVP: -287.614645512  
Number of imaginary frequencies: 0

#### Nitrobenzene

|   |          |          |          |
|---|----------|----------|----------|
| C | 2.51021  | -0.00001 | 0.00007  |
| C | 1.81626  | 1.18282  | -0.25844 |
| C | 0.42409  | 1.19087  | -0.26016 |
| C | -0.24587 | -0.00009 | -0.00006 |
| C | 0.42414  | -1.19102 | 0.26011  |
| C | 1.81631  | -1.18288 | 0.25851  |
| H | 3.60214  | 0.00001  | 0.00011  |
| H | 2.36201  | 2.10628  | -0.46032 |
| H | -0.14987 | 2.09556  | -0.45779 |
| H | -0.14980 | -2.09572 | 0.45772  |

|   |          |          |          |
|---|----------|----------|----------|
| H | 2.36212  | -2.10629 | 0.46044  |
| N | -1.72190 | -0.00002 | -0.00011 |
| O | -2.28102 | 1.04988  | -0.22789 |
| O | -2.28135 | -1.04973 | 0.22782  |

Electronic energy (a.u.) at  $\omega$ B97X-D/def2-SVP: -436.2831699

Number of imaginary frequencies: 0

**p-nitroaniline**

|   |          |          |          |
|---|----------|----------|----------|
| C | -2.07511 | 0.06258  | -0.00682 |
| C | -1.37654 | -1.13744 | 0.24399  |
| C | 0.00760  | -1.16413 | 0.24587  |
| C | 0.71694  | 0.00948  | -0.00306 |
| C | 0.05334  | 1.20922  | -0.25360 |
| C | -1.33084 | 1.23525  | -0.25532 |
| H | -1.93564 | -2.05589 | 0.43669  |
| H | 0.55567  | -2.08586 | 0.43941  |
| H | 0.63707  | 2.10957  | -0.44375 |
| H | -1.85411 | 2.17341  | -0.45360 |
| N | 2.17735  | -0.01763 | 0.00043  |
| O | 2.76226  | 1.02344  | -0.21847 |
| O | 2.72233  | -1.07957 | 0.22203  |
| N | -3.44153 | 0.08229  | -0.03807 |
| H | -3.95519 | -0.70760 | 0.32358  |
| H | -3.92299 | 0.96925  | -0.02865 |

Electronic energy (a.u.) at  $\omega$ B97X-D/def2-SVP: -491.59024

Number of imaginary frequencies: 0

**Compound 1**

|   |          |          |          |
|---|----------|----------|----------|
| W | -0.35181 | 0.16710  | -0.10348 |
| P | -1.51694 | -2.05336 | -0.14939 |
| O | -1.82539 | 0.90390  | -2.55797 |
| N | 0.90686  | -0.55180 | 1.71717  |
| N | 2.24780  | -0.57353 | 1.63781  |
| N | 1.28067  | -0.83083 | -1.28279 |
| N | 2.55185  | -0.89857 | -0.85272 |
| N | 1.30317  | 1.70653  | -0.20716 |
| N | 2.57794  | 1.38872  | 0.08761  |
| N | -1.22928 | 0.63558  | -1.55903 |
| C | -2.08456 | 0.53899  | 1.32738  |
| C | -1.22897 | 1.72013  | 1.23402  |
| C | -1.79520 | 2.92851  | 0.65111  |
| C | -3.02527 | 2.93911  | 0.07894  |
| C | -3.86618 | 1.76937  | 0.15147  |
| C | -3.44004 | 0.65717  | 0.80079  |

|   |          |          |          |
|---|----------|----------|----------|
| C | 2.77433  | -1.01897 | 2.79102  |
| C | 1.73586  | -1.30142 | 3.66506  |
| C | 0.58290  | -0.98538 | 2.93667  |
| C | 3.32290  | -1.47395 | -1.79298 |
| C | 2.52291  | -1.79704 | -2.87819 |
| C | 1.24603  | -1.35557 | -2.50717 |
| C | 3.37507  | 2.45365  | -0.12324 |
| C | 2.59199  | 3.50322  | -0.57291 |
| C | 1.29401  | 2.97367  | -0.61276 |
| C | -2.87474 | -2.09870 | -1.37139 |
| C | -2.30523 | -2.72489 | 1.36875  |
| C | -0.47865 | -3.49809 | -0.61701 |
| B | 2.98640  | -0.07143 | 0.38092  |
| H | -1.99592 | -0.08389 | 2.22532  |
| H | 4.18487  | -0.15599 | 0.54498  |
| H | -0.49269 | 1.87954  | 2.03178  |
| H | -1.21099 | 3.85116  | 0.70347  |
| H | -3.41489 | 3.85058  | -0.37929 |
| H | -4.87835 | 1.81235  | -0.25688 |
| H | -4.13670 | -0.17378 | 0.95348  |
| H | 3.85179  | -1.09943 | 2.91109  |
| H | 1.80298  | -1.67453 | 4.68254  |
| H | -0.45943 | -1.03955 | 3.24175  |
| H | 4.39062  | -1.59868 | -1.63029 |
| H | 2.82233  | -2.26917 | -3.80901 |
| H | 0.31039  | -1.37133 | -3.06318 |
| H | 4.44520  | 2.38505  | 0.05605  |
| H | 2.91181  | 4.50620  | -0.83893 |
| H | 0.35826  | 3.43394  | -0.92024 |
| H | -3.60561 | -1.32046 | -1.11155 |
| H | -2.47307 | -1.83936 | -2.36094 |
| H | -3.36318 | -3.08346 | -1.40807 |
| H | -1.54144 | -2.85499 | 2.14872  |
| H | -3.07517 | -2.03761 | 1.74153  |
| H | -2.76747 | -3.70145 | 1.16175  |
| H | 0.39014  | -3.54492 | 0.05643  |
| H | -0.10223 | -3.38389 | -1.64115 |
| H | -1.04775 | -4.43682 | -0.54562 |

Electronic energy (a.u.) at  $\omega$ B97X-D/def2-SVP: -1591.61003619

Number of imaginary frequencies: 0

### Compound 2

|    |          |          |          |
|----|----------|----------|----------|
| Re | -0.93948 | -0.73959 | -0.47680 |
| C  | -1.04947 | -2.95306 | -0.35982 |
| C  | -1.13816 | -2.55067 | -1.75190 |

|   |          |          |          |
|---|----------|----------|----------|
| C | -2.38007 | -2.82077 | -2.45522 |
| C | -3.47159 | -3.32044 | -1.81645 |
| C | -3.39126 | -3.69458 | -0.43014 |
| C | -2.21968 | -3.56468 | 0.24720  |
| N | -0.92911 | 0.21731  | -2.43401 |
| C | -1.83566 | 0.27384  | -3.40635 |
| C | -1.38040 | 1.10118  | -4.44391 |
| C | -0.14318 | 1.54446  | -4.01053 |
| N | 0.10408  | 0.99838  | -2.80344 |
| N | 1.31659  | -0.96460 | -0.80562 |
| C | 2.20653  | -1.93046 | -0.57469 |
| C | 3.47552  | -1.54536 | -1.03127 |
| C | 3.27476  | -0.27852 | -1.55634 |
| N | 1.97651  | 0.03876  | -1.40576 |
| N | -0.38291 | 1.29883  | 0.09078  |
| C | -0.80359 | 2.08644  | 1.07970  |
| C | -0.07793 | 3.28628  | 1.07868  |
| C | 0.79511  | 3.15700  | 0.00911  |
| N | 0.59261  | 1.95466  | -0.55874 |
| B | 1.24054  | 1.33192  | -1.81867 |
| N | -0.65316 | -1.06187 | 1.65886  |
| C | -1.61443 | -1.34173 | 2.59878  |
| C | -1.03891 | -1.34025 | 3.83991  |
| N | 0.29218  | -1.05326 | 3.64640  |
| C | 0.47725  | -0.89254 | 2.31790  |
| C | 1.30437  | -0.93189 | 4.67252  |
| C | -2.76394 | -0.47326 | -0.25640 |
| O | -3.91213 | -0.29740 | -0.10540 |
| H | -0.09115 | -3.31045 | 0.03420  |
| H | -0.23019 | -2.57766 | -2.36529 |
| H | -2.41633 | -2.63769 | -3.53256 |
| H | -4.40104 | -3.49171 | -2.36424 |
| H | -4.26441 | -4.13416 | 0.05759  |
| H | -2.13571 | -3.94290 | 1.27025  |
| H | -2.76816 | -0.27536 | -3.30346 |
| H | -1.88727 | 1.34558  | -5.37263 |
| H | 0.57793  | 2.21651  | -4.46900 |
| H | 1.89850  | -2.85892 | -0.09882 |
| H | 4.40104  | -2.11225 | -0.99292 |
| H | 3.96280  | 0.41825  | -2.02875 |
| H | -1.60928 | 1.75229  | 1.73012  |
| H | -0.18797 | 4.13416  | 1.74829  |
| H | 1.53909  | 3.83946  | -0.39435 |
| H | 2.02411  | 2.11195  | -2.31899 |
| H | -2.64686 | -1.51845 | 2.30922  |
| H | -1.45522 | -1.51301 | 4.82827  |

|   |         |          |         |
|---|---------|----------|---------|
| H | 1.43531 | -0.64320 | 1.86651 |
| H | 2.26613 | -0.69698 | 4.20080 |
| H | 1.40532 | -1.87415 | 5.22892 |
| H | 1.04928 | -0.12414 | 5.37263 |

Electronic energy (a.u.) at  $\omega$ B97X-D/def2-SVP: -1390.6046139

Number of imaginary frequencies: 0

### Compound 3

|    |          |          |          |
|----|----------|----------|----------|
| Os | 0.21103  | 0.55629  | -0.12066 |
| N  | -0.36540 | 2.67926  | -0.16376 |
| H  | -0.68793 | 3.05831  | 0.73149  |
| H  | 0.40628  | 3.29856  | -0.43364 |
| N  | -1.91114 | -0.02715 | 0.01092  |
| H  | -2.42618 | 0.03962  | -0.87182 |
| H  | -2.07012 | -0.98955 | 0.32527  |
| N  | -0.02002 | 0.41858  | -2.30326 |
| H  | 0.03593  | 1.31485  | -2.79588 |
| H  | 0.72777  | -0.14469 | -2.72010 |
| N  | 0.15753  | 0.53258  | 2.07442  |
| H  | 0.93384  | -0.01731 | 2.45671  |
| H  | 0.26306  | 1.45005  | 2.51780  |
| N  | 0.78256  | -1.54734 | -0.09370 |
| H  | 1.75701  | -1.64914 | -0.40273 |
| H  | 0.75734  | -2.00007 | 0.82396  |
| C  | 2.32265  | 1.31735  | 0.48025  |
| C  | 3.14894  | 0.39034  | 1.21072  |
| C  | 3.84777  | -0.59020 | 0.56057  |
| C  | 3.81238  | -0.67468 | -0.86595 |
| C  | 3.07852  | 0.22552  | -1.59232 |
| C  | 2.28554  | 1.23140  | -0.93479 |
| H  | 2.10307  | 2.27067  | 0.97157  |
| H  | 3.28168  | 0.52526  | 2.28777  |
| H  | 4.49564  | -1.26716 | 1.12147  |
| H  | 4.43690  | -1.41169 | -1.37573 |
| H  | 3.15338  | 0.22991  | -2.68323 |
| H  | 2.03553  | 2.11814  | -1.52631 |
| H  | -1.11739 | 2.91032  | -0.81954 |
| H  | -0.88746 | -0.00914 | -2.63979 |
| H  | -2.45664 | 0.55199  | 0.65648  |
| H  | -0.68541 | 0.13326  | 2.49700  |
| H  | 0.24308  | -2.16721 | -0.70421 |

Electronic energy (a.u.) at  $\omega$ B97X-D/def2-SVP: -604.8462931

Number of imaginary frequencies: 0

**Compound 4**

|    |          |          |          |
|----|----------|----------|----------|
| Cr | -0.62345 | 0.12094  | -0.03072 |
| C  | 0.16151  | -0.84517 | -1.33353 |
| C  | -2.22355 | -0.73730 | -0.44056 |
| C  | 0.97606  | 1.02084  | 0.17862  |
| C  | -1.26922 | 1.58906  | -0.85199 |
| O  | 1.99262  | 1.61063  | 0.22263  |
| O  | -3.21236 | -1.24601 | -0.80080 |
| O  | 0.67603  | -1.45668 | -2.20532 |
| O  | -1.67683 | 2.54679  | -1.41357 |
| C  | -2.33444 | -2.24419 | 2.49870  |
| C  | -1.03022 | -2.18843 | 2.10397  |
| C  | -0.32485 | -0.95005 | 1.84393  |
| C  | -1.06580 | 0.31006  | 2.09513  |
| C  | -2.42623 | 0.18580  | 2.57732  |
| C  | -3.06009 | -1.01007 | 2.74476  |
| H  | -2.83726 | -3.20949 | 2.63332  |
| H  | -0.47291 | -3.12700 | 1.97300  |
| H  | 0.74927  | -0.98649 | 2.06252  |
| H  | -0.52171 | 1.17502  | 2.49347  |
| H  | -2.96584 | 1.11284  | 2.81832  |
| H  | -4.10852 | -1.04743 | 3.06438  |

Electronic energy (a.u.) at  $\omega$ B97X-D/def2-SVP:-1729.1258583

Number of imaginary frequencies: 0

**Compound 5**

|    |          |          |          |
|----|----------|----------|----------|
| Mn | -0.63121 | 0.12031  | -0.05302 |
| C  | 0.15595  | -0.91464 | -1.26477 |
| C  | -2.20661 | -0.74006 | -0.38459 |
| C  | 0.93994  | 0.99476  | 0.19718  |
| C  | -1.32035 | 1.59546  | -0.76582 |
| O  | 1.94169  | 1.55648  | 0.33589  |
| O  | -3.19554 | -1.26892 | -0.64972 |
| O  | 0.66675  | -1.56543 | -2.08232 |
| O  | -1.75491 | 2.55251  | -1.26387 |
| C  | -2.31852 | -2.21390 | 2.43253  |
| C  | -1.01336 | -2.17133 | 2.04494  |
| C  | -0.32013 | -0.92134 | 1.81657  |
| C  | -1.04371 | 0.30942  | 2.06164  |
| C  | -2.41342 | 0.21012  | 2.51898  |
| C  | -3.03795 | -0.99019 | 2.67614  |
| H  | -2.82157 | -3.17404 | 2.57703  |
| H  | -0.45585 | -3.10313 | 1.90471  |
| H  | 0.76099  | -0.95152 | 1.97644  |
| H  | -0.50071 | 1.19455  | 2.40367  |

|   |          |          |         |
|---|----------|----------|---------|
| H | -2.94873 | 1.13717  | 2.74870 |
| H | -4.08054 | -1.03262 | 3.00327 |

Electronic energy (a.u.) at  $\omega$ B97X-D/def2-SVP: -1835.7735574  
Number of imaginary frequencies: 0

### Compound 6

|    |          |          |          |
|----|----------|----------|----------|
| Fe | -0.62533 | 0.13551  | -0.11238 |
| C  | 0.18734  | -0.99624 | -1.22185 |
| C  | -2.19306 | -0.72344 | -0.42904 |
| C  | 0.94167  | 1.01299  | 0.11073  |
| C  | -1.36667 | 1.64592  | -0.69655 |
| O  | 1.92971  | 1.56732  | 0.24636  |
| O  | -3.17416 | -1.25534 | -0.65535 |
| O  | 0.68945  | -1.66805 | -2.00391 |
| O  | -1.81772 | 2.59465  | -1.15649 |
| C  | -2.33211 | -2.20410 | 2.40854  |
| C  | -1.00262 | -2.16872 | 2.06450  |
| C  | -0.32173 | -0.92354 | 1.93321  |
| C  | -1.02662 | 0.27552  | 2.17202  |
| C  | -2.40247 | 0.21253  | 2.53854  |
| C  | -3.04051 | -0.99908 | 2.64839  |
| H  | -2.84512 | -3.16215 | 2.51343  |
| H  | -0.44705 | -3.09551 | 1.90717  |
| H  | 0.76893  | -0.93314 | 1.92687  |
| H  | -0.48938 | 1.20734  | 2.35305  |
| H  | -2.93733 | 1.14064  | 2.75043  |
| H  | -4.09301 | -1.03944 | 2.93590  |

Electronic energy (a.u.) at  $\omega$ B97X-D/def2-SVP: -1948.4356211  
Number of imaginary frequencies: 0

### Compound 7

|   |          |          |          |
|---|----------|----------|----------|
| W | 0.43633  | 0.17188  | -0.52891 |
| P | 2.70254  | -0.44557 | 0.38472  |
| O | 0.95289  | 2.99446  | 0.17883  |
| N | -1.80330 | 0.29835  | -0.65447 |
| N | -2.59351 | -0.69934 | -0.20841 |
| N | 0.02654  | -2.08114 | -0.90370 |
| N | -1.02463 | -2.67888 | -0.31952 |
| N | -0.30405 | -0.32092 | 1.54308  |
| N | -1.22822 | -1.26917 | 1.77044  |
| N | 0.72644  | 1.86415  | -0.12646 |
| C | 2.15342  | 2.57231  | -2.94085 |
| H | 2.85001  | 3.41102  | -3.01329 |
| C | 2.59097  | 1.35024  | -2.57500 |

|   |          |          |          |
|---|----------|----------|----------|
| H | 3.65952  | 1.20382  | -2.38534 |
| C | 1.68732  | 0.20836  | -2.40624 |
| C | 0.28414  | 0.42136  | -2.72982 |
| C | 0.33724  | 4.03349  | -3.83287 |
| H | 1.03586  | 4.87461  | -3.83219 |
| C | -1.40832 | 1.87281  | -3.87418 |
| H | -2.09223 | 1.02016  | -3.89636 |
| C | 0.77028  | 2.79382  | -3.33882 |
| C | -0.13217 | 1.70277  | -3.31607 |
| C | -0.94818 | 4.19796  | -4.33454 |
| C | -1.81876 | 3.10483  | -4.37201 |
| C | -3.88581 | -0.32833 | -0.29930 |
| H | -4.67558 | -1.00179 | 0.02459  |
| C | -3.93879 | 0.95226  | -0.82115 |
| H | -4.81991 | 1.55211  | -1.02768 |
| C | -2.59469 | 1.30411  | -1.01705 |
| H | -2.16251 | 2.22439  | -1.40145 |
| C | -1.08550 | -3.97064 | -0.68427 |
| H | -1.87842 | -4.61329 | -0.30983 |
| C | -0.03012 | -4.23178 | -1.54490 |
| H | 0.21726  | -5.17061 | -2.03105 |
| C | 0.63520  | -3.00463 | -1.64990 |
| H | 1.51126  | -2.74378 | -2.23926 |
| C | -1.53802 | -1.30065 | 3.07870  |
| H | -2.28647 | -1.99538 | 3.45184  |
| C | -0.78377 | -0.33739 | 3.73171  |
| H | -0.78883 | -0.09182 | 4.78937  |
| C | -0.03333 | 0.26059  | 2.71112  |
| H | 0.67374  | 1.08699  | 2.75456  |
| C | 3.67025  | 1.01816  | 0.89620  |
| H | 4.65179  | 0.74066  | 1.30770  |
| H | 3.09773  | 1.58457  | 1.64386  |
| H | 3.79544  | 1.67620  | 0.02493  |
| C | 3.89698  | -1.38642 | -0.64497 |
| H | 4.14749  | -0.82878 | -1.55610 |
| H | 3.45025  | -2.34850 | -0.93353 |
| H | 4.81991  | -1.58133 | -0.07904 |
| C | 2.68892  | -1.50621 | 1.88628  |
| H | 2.11058  | -2.41647 | 1.66808  |
| H | 2.19683  | -0.98876 | 2.71915  |
| H | 3.70988  | -1.78524 | 2.18581  |
| B | -1.99931 | -1.88863 | 0.57606  |
| H | -2.87799 | -2.62162 | 0.97697  |
| H | 2.12636  | -0.76401 | -2.65997 |
| H | -0.27256 | -0.44520 | -3.10803 |
| H | -1.26846 | 5.17061  | -4.71456 |



H -2.82242 3.21658 -4.78937

Electronic energy (a.u.) at  $\omega$ B97X-D/def2-SVP: -1745.1106979

Number of imaginary frequencies: 0

**Compound 7'**

|   |          |          |          |
|---|----------|----------|----------|
| W | 0.43658  | -0.06549 | -0.67328 |
| P | 2.89512  | -0.30829 | -0.25966 |
| O | 0.74818  | 2.85165  | -0.30511 |
| N | -1.80498 | -0.19793 | -0.40628 |
| N | -2.37101 | -1.20384 | 0.28690  |
| N | 0.22382  | -2.37877 | -0.78489 |
| N | -0.62526 | -3.01130 | 0.04217  |
| N | 0.15503  | -0.41694 | 1.51928  |
| N | -0.60322 | -1.41588 | 2.00323  |
| N | 0.60117  | 1.67897  | -0.46937 |
| C | 2.00443  | 1.00690  | -3.31233 |
| H | 3.08614  | 0.90663  | -3.45127 |
| C | 1.25633  | -0.12314 | -2.82298 |
| C | -0.20579 | -0.01553 | -2.82939 |
| C | -0.79312 | 1.19452  | -3.33720 |
| C | 2.17737  | 3.35981  | -4.04724 |
| H | 3.26876  | 3.28865  | -4.03524 |
| C | -0.63718 | 3.54576  | -4.08420 |
| H | -1.72825 | 3.61779  | -4.09927 |
| C | 1.41284  | 2.20446  | -3.63539 |
| C | -0.04240 | 2.30190  | -3.65423 |
| C | 1.56671  | 4.50907  | -4.43211 |
| C | 0.12826  | 4.60488  | -4.45141 |
| C | -3.69997 | -1.00415 | 0.37971  |
| H | -4.32805 | -1.71349 | 0.91299  |
| C | -4.01119 | 0.17512  | -0.27550 |
| H | -4.98836 | 0.63403  | -0.39218 |
| C | -2.77643 | 0.64536  | -0.74625 |
| H | -2.53585 | 1.54962  | -1.29998 |
| C | -0.59702 | -4.33497 | -0.18600 |
| H | -1.22593 | -5.00812 | 0.39127  |
| C | 0.30811  | -4.58322 | -1.20653 |
| H | 0.57405  | -5.54061 | -1.64423 |
| C | 0.79267  | -3.31497 | -1.54691 |
| H | 1.51466  | -3.03876 | -2.31166 |
| C | -0.66700 | -1.33279 | 3.34463  |
| H | -1.25272 | -2.05008 | 3.91424  |
| C | 0.07988  | -0.23843 | 3.75220  |
| H | 0.23890  | 0.11945  | 4.76492  |
| C | 0.56455  | 0.31088  | 2.55799  |

|   |          |          |          |
|---|----------|----------|----------|
| H | 1.16911  | 1.20048  | 2.39136  |
| C | 3.75480  | 1.30470  | -0.26447 |
| H | 4.83006  | 1.19947  | -0.05854 |
| H | 3.28894  | 1.95940  | 0.48535  |
| H | 3.59962  | 1.78280  | -1.24173 |
| C | 3.94004  | -1.33434 | -1.37193 |
| H | 3.88901  | -0.96432 | -2.40385 |
| H | 3.58256  | -2.37392 | -1.35171 |
| H | 4.98836  | -1.31647 | -1.03890 |
| C | 3.37457  | -1.03679 | 1.35990  |
| H | 2.88542  | -2.01618 | 1.46934  |
| H | 3.03181  | -0.39794 | 2.18326  |
| H | 4.46505  | -1.16231 | 1.43295  |
| B | -1.50188 | -2.23212 | 1.04308  |
| H | -2.19792 | -3.00280 | 1.66905  |
| H | -0.78915 | -0.93274 | -2.97174 |
| H | -1.87467 | 1.22495  | -3.49551 |
| H | 2.16248  | 5.37412  | -4.73223 |
| H | -0.33991 | 5.54061  | -4.76492 |
| H | 1.69901  | -1.10289 | -3.03241 |

Electronic energy (a.u.) at  $\omega$ B97X-D/def2-SVP: -1745.0793217  
Number of imaginary frequencies: 0

### Compound 8

|    |          |          |          |
|----|----------|----------|----------|
| Re | -0.31356 | -0.02665 | -0.65034 |
| N  | -0.06557 | 1.13743  | -2.47927 |
| C  | -0.86595 | 1.33775  | -3.52360 |
| C  | -0.27853 | 2.24704  | -4.41505 |
| C  | 0.92310  | 2.58479  | -3.81686 |
| N  | 1.02664  | 1.90413  | -2.65891 |
| N  | 1.95747  | -0.31315 | -0.78422 |
| C  | 2.78680  | -1.33865 | -0.58492 |
| C  | 4.10751  | -0.96245 | -0.86883 |
| C  | 4.00385  | 0.36345  | -1.25818 |
| N  | 2.70874  | 0.72052  | -1.19623 |
| N  | 0.24742  | 1.93184  | 0.18147  |
| C  | -0.25148 | 2.63679  | 1.19575  |
| C  | 0.51178  | 3.79570  | 1.39543  |
| C  | 1.49227  | 3.73195  | 0.41685  |
| N  | 1.31125  | 2.60219  | -0.28968 |
| B  | 2.06621  | 2.08226  | -1.53564 |
| N  | -0.27395 | -0.53644 | 1.46409  |
| C  | -1.35282 | -0.72383 | 2.29293  |
| C  | -0.90654 | -0.88156 | 3.57586  |
| N  | 0.46507  | -0.79240 | 3.51993  |

|   |          |          |          |
|---|----------|----------|----------|
| C | 0.80055  | -0.58281 | 2.22960  |
| C | 1.37852  | -0.88470 | 4.63778  |
| C | -2.14030 | 0.30235  | -0.58773 |
| O | -3.28845 | 0.52440  | -0.53912 |
| H | -1.82393 | 0.82649  | -3.57278 |
| H | -0.67900 | 2.61037  | -5.35669 |
| H | 1.71034  | 3.26760  | -4.12643 |
| H | 2.40251  | -2.30081 | -0.25384 |
| H | 5.00434  | -1.57190 | -0.80872 |
| H | 4.75917  | 1.07713  | -1.57782 |
| H | -1.13393 | 2.27789  | 1.72142  |
| H | 0.35910  | 4.57716  | 2.13388  |
| H | 2.29989  | 4.41563  | 0.16704  |
| H | 2.92424  | 2.87256  | -1.86945 |
| H | -2.36734 | -0.74335 | 1.90485  |
| H | -1.43794 | -1.05650 | 4.50674  |
| H | 1.82382  | -0.45206 | 1.88412  |
| H | 2.40746  | -0.79741 | 4.26853  |
| H | 1.26729  | -1.85226 | 5.14648  |
| H | 1.19191  | -0.07473 | 5.35669  |
| C | -2.90089 | -4.08359 | 1.46204  |
| C | -1.73249 | -3.51914 | 0.96608  |
| C | -1.70800 | -2.86484 | -0.27583 |
| C | -2.88816 | -2.84681 | -1.05918 |
| C | -4.06387 | -3.41286 | -0.53887 |
| C | -4.07979 | -4.01629 | 0.71143  |
| H | -2.89874 | -4.57716 | 2.43709  |
| H | -0.81121 | -3.56520 | 1.55400  |
| C | -0.48807 | -2.21428 | -0.76998 |
| C | -2.83173 | -2.30952 | -2.40894 |
| H | -4.97511 | -3.38157 | -1.14235 |
| H | -5.00434 | -4.45035 | 1.09885  |
| C | -1.68543 | -1.80500 | -2.91391 |
| C | -0.47210 | -1.66998 | -2.10994 |
| H | -3.73340 | -2.36717 | -3.02371 |
| H | -1.64868 | -1.48920 | -3.96007 |
| H | 0.46896  | -1.70072 | -2.67161 |
| H | 0.42987  | -2.66702 | -0.37808 |

Electronic energy (a.u.) at  $\omega$ B97X-D/def2-SVP: -1544.1055477

Number of imaginary frequencies: 0

**Compound 8'**

|    |          |          |          |
|----|----------|----------|----------|
| Re | 0.24648  | -0.46037 | -0.53124 |
| N  | 0.30458  | 0.52639  | -2.46986 |
| C  | -0.58720 | 0.62238  | -3.45298 |

|   |          |          |          |
|---|----------|----------|----------|
| C | -0.10351 | 1.46737  | -4.46343 |
| C | 1.13424  | 1.87952  | -4.00193 |
| N | 1.35514  | 1.29981  | -2.80520 |
| N | 2.50666  | -0.71177 | -0.81056 |
| C | 3.38243  | -1.68943 | -0.57308 |
| C | 4.66336  | -1.31385 | -1.00289 |
| C | 4.48554  | -0.03954 | -1.51835 |
| N | 3.18837  | 0.28990  | -1.38841 |
| N | 0.81922  | 1.53964  | 0.09205  |
| C | 0.39152  | 2.30944  | 1.09246  |
| C | 1.12777  | 3.50221  | 1.12746  |
| C | 2.01500  | 3.38828  | 0.06814  |
| N | 1.80980  | 2.20079  | -0.52965 |
| B | 2.47465  | 1.59886  | -1.79088 |
| N | 0.46401  | -0.85756 | 1.59841  |
| C | -0.53079 | -1.15104 | 2.49906  |
| C | 0.00532  | -1.19851 | 3.75700  |
| N | 1.34605  | -0.92826 | 3.61438  |
| C | 1.57558  | -0.72817 | 2.29797  |
| C | 2.32691  | -0.85611 | 4.67503  |
| C | -1.57993 | -0.16712 | -0.34982 |
| O | -2.72810 | 0.02535  | -0.22481 |
| H | -1.53150 | 0.08924  | -3.37590 |
| H | -0.59333 | 1.74379  | -5.39233 |
| H | 1.87217  | 2.55133  | -4.43318 |
| H | 3.05763  | -2.61917 | -0.11104 |
| H | 5.58202  | -1.89088 | -0.95309 |
| H | 5.18966  | 0.65491  | -1.97001 |
| H | -0.42688 | 1.96910  | 1.72342  |
| H | 1.01569  | 4.33613  | 1.81401  |
| H | 2.77146  | 4.07207  | -0.30894 |
| H | 3.27680  | 2.38030  | -2.25841 |
| H | -1.55700 | -1.29905 | 2.17314  |
| H | -0.44508 | -1.39398 | 4.72601  |
| H | 2.55126  | -0.48001 | 1.88528  |
| H | 3.30675  | -0.62243 | 4.24143  |
| H | 2.39543  | -1.81695 | 5.20393  |
| H | 2.06236  | -0.06670 | 5.39233  |
| C | -4.61915 | -3.94814 | -0.74784 |
| C | -3.47231 | -3.85059 | -0.02510 |
| C | -2.25940 | -3.33487 | -0.61074 |
| C | -2.29107 | -2.92170 | -2.00454 |
| C | -3.53108 | -3.05624 | -2.72778 |
| C | -4.64943 | -3.54322 | -2.12803 |
| H | -5.52960 | -4.33613 | -0.28519 |
| H | -3.44927 | -4.16014 | 1.02363  |

|   |          |          |          |
|---|----------|----------|----------|
| C | -1.06805 | -3.27943 | 0.08222  |
| C | -1.13151 | -2.47082 | -2.60161 |
| H | -3.55355 | -2.74800 | -3.77681 |
| H | -5.58202 | -3.63036 | -2.69013 |
| C | 0.08001  | -2.26633 | -1.86690 |
| C | 0.11831  | -2.70187 | -0.47730 |
| H | -1.13016 | -2.28339 | -3.67896 |
| H | 1.00817  | -2.26521 | -2.44758 |
| H | -1.02050 | -3.70668 | 1.08827  |
| H | 1.06120  | -3.05870 | -0.05064 |

Electronic energy (a.u.) at  $\omega$ B97X-D/def2-SVP: -1544.0756089  
 Number of imaginary frequencies: 0

### Compound 9

|    |          |          |          |
|----|----------|----------|----------|
| Cr | 1.56318  | 0.61752  | 0.34702  |
| C  | 2.98298  | -0.09222 | -0.49629 |
| C  | 2.28708  | 0.58791  | 1.99863  |
| C  | 2.17938  | 2.24506  | -0.10307 |
| C  | 0.10081  | -0.45367 | -0.75867 |
| C  | -0.35123 | 0.85772  | -0.54119 |
| C  | -0.53699 | 1.20648  | 0.86504  |
| C  | -1.20957 | 0.16276  | 1.68008  |
| C  | -0.77658 | -1.09509 | 1.47127  |
| C  | 0.30281  | -1.23258 | 0.46026  |
| H  | 0.28465  | -0.83691 | -1.77131 |
| H  | -0.53643 | 1.54706  | -1.37580 |
| H  | -0.78418 | 2.25348  | 1.08410  |
| H  | -2.07803 | 0.39057  | 2.32010  |
| H  | -1.26483 | -1.97199 | 1.92773  |
| H  | 0.75747  | -2.22468 | 0.34073  |
| O  | 2.75461  | 0.56500  | 3.08166  |
| O  | 3.92151  | -0.54564 | -1.06482 |
| O  | 2.59533  | 3.31244  | -0.41502 |

Electronic energy (a.u.) at  $\omega$ B97X-D/def2-SVP: -1615.8901156  
 Number of imaginary frequencies: 0

### Compound 10

|    |          |          |          |
|----|----------|----------|----------|
| Mn | 1.52787  | 0.06150  | 0.14358  |
| C  | 2.66268  | -1.16737 | -0.47380 |
| C  | 1.88452  | -0.03865 | 1.88261  |
| C  | 2.62784  | 1.38613  | -0.31959 |
| C  | -0.06139 | -0.59572 | -1.00478 |
| C  | -0.08053 | 0.80868  | -0.92000 |
| C  | -0.20217 | 1.31957  | 0.43290  |

|   |          |          |          |
|---|----------|----------|----------|
| C | -1.19353 | 0.62631  | 1.29760  |
| C | -1.17530 | -0.71168 | 1.21684  |
| C | -0.16690 | -1.26874 | 0.27666  |
| H | 0.07002  | -1.11563 | -1.95825 |
| H | 0.03515  | 1.44286  | -1.80380 |
| H | -0.09412 | 2.40164  | 0.56101  |
| H | -1.92666 | 1.18813  | 1.88619  |
| H | -1.89194 | -1.35991 | 1.73237  |
| H | -0.02930 | -2.35502 | 0.27387  |
| O | 2.07542  | -0.10495 | 3.02326  |
| O | 3.37741  | -1.99226 | -0.87397 |
| O | 3.31921  | 2.27231  | -0.61642 |

Electronic energy (a.u.) at  $\omega$ B97X-D/def2-SVP: -1722.5514265  
 Number of imaginary frequencies: 0

### Compound 11

|    |          |          |          |
|----|----------|----------|----------|
| Fe | 1.49448  | 0.06145  | 0.13723  |
| C  | 2.63276  | -1.18250 | -0.47895 |
| C  | 1.78383  | -0.04104 | 1.90479  |
| C  | 2.59756  | 1.40070  | -0.32370 |
| C  | -0.05694 | -0.59510 | -1.02471 |
| C  | -0.07612 | 0.81092  | -0.93959 |
| C  | -0.20206 | 1.32644  | 0.39709  |
| C  | -1.14306 | 0.62545  | 1.30494  |
| C  | -1.12483 | -0.71070 | 1.22407  |
| C  | -0.16661 | -1.27127 | 0.23987  |
| H  | 0.11107  | -1.11294 | -1.97105 |
| H  | 0.07622  | 1.44347  | -1.81631 |
| H  | -0.07618 | 2.40407  | 0.53002  |
| H  | -1.81640 | 1.19086  | 1.95154  |
| H  | -1.78148 | -1.36804 | 1.79667  |
| H  | -0.01127 | -2.35324 | 0.24211  |
| O  | 1.94765  | -0.10665 | 3.03183  |
| O  | 3.31423  | -2.01888 | -0.85435 |
| O  | 3.25543  | 2.29419  | -0.59523 |

Electronic energy (a.u.) at  $\omega$ B97X-D/def2-SVP: -1835.215043  
 Number of imaginary frequencies: 0

### Compound 12

|   |          |          |          |
|---|----------|----------|----------|
| C | -1.49931 | -1.21825 | 0.34471  |
| H | -1.36930 | -2.24368 | 0.70084  |
| C | -1.33739 | -0.98455 | -1.06084 |
| H | -1.15140 | -1.78537 | -1.77925 |
| C | -1.27684 | 0.38164  | -1.42664 |

|    |          |          |          |
|----|----------|----------|----------|
| H  | -1.04129 | 0.69891  | -2.44442 |
| C  | -1.38780 | 1.29769  | -0.32895 |
| H  | -1.16574 | 2.34933  | -0.52895 |
| C  | -2.31105 | 0.98005  | 0.77595  |
| H  | -2.91620 | 1.75921  | 1.24482  |
| C  | -2.36853 | -0.31687 | 1.12320  |
| H  | -3.02543 | -0.70531 | 1.90471  |
| C  | 1.80526  | -1.21596 | 0.27339  |
| C  | 2.14941  | -0.32957 | -0.77663 |
| C  | 1.90291  | 0.98732  | -0.31654 |
| C  | 1.50221  | 0.92257  | 1.06397  |
| C  | 1.44189  | -0.43846 | 1.42839  |
| H  | 2.02382  | 1.90096  | -0.89646 |
| H  | 2.46111  | -0.61213 | -1.78034 |
| H  | 1.83747  | -2.30347 | 0.22928  |
| H  | 1.14766  | -0.83486 | 2.39800  |
| H  | 1.26322  | 1.77249  | 1.69988  |
| Co | 0.12331  | -0.06160 | -0.11119 |

Electronic energy (a.u.) at  $\omega$ B97X-D/def2-SVP: -1807.9559646

Number of imaginary frequencies: 0

### Compound 13

|    |          |          |          |
|----|----------|----------|----------|
| C  | -1.59248 | -1.29897 | 0.01604  |
| H  | -1.43163 | -2.37787 | 0.09305  |
| C  | -1.46471 | -0.71153 | -1.29482 |
| H  | -1.29523 | -1.29396 | -2.20244 |
| C  | -1.46471 | 0.71147  | -1.29485 |
| H  | -1.29523 | 1.29385  | -2.20251 |
| C  | -1.59248 | 1.29898  | 0.01597  |
| H  | -1.43163 | 2.37788  | 0.09293  |
| C  | -2.53154 | 0.66999  | 0.97632  |
| H  | -3.19848 | 1.28080  | 1.58839  |
| C  | -2.53154 | -0.66994 | 0.97635  |
| H  | -3.19848 | -1.28072 | 1.58845  |
| C  | 1.82083  | -1.14292 | 0.69771  |
| C  | 2.28378  | -0.70406 | -0.58906 |
| C  | 2.28377  | 0.70409  | -0.58905 |
| C  | 1.82082  | 1.14294  | 0.69772  |
| C  | 1.60564  | 0.00001  | 1.52478  |
| H  | 2.56240  | 1.35105  | -1.41866 |
| H  | 2.56242  | -1.35101 | -1.41867 |
| H  | 1.72756  | -2.18094 | 1.01367  |
| H  | 1.31795  | 0.00000  | 2.57344  |
| H  | 1.72753  | 2.18096  | 1.01368  |
| Rh | 0.12345  | -0.00000 | -0.12152 |

Electronic energy (a.u.) at  $\omega$ B97X-D/def2-SVP: -535.906971

Number of imaginary frequencies: 0

**Compound 14**

|    |          |          |          |
|----|----------|----------|----------|
| Ir | 0.14100  | -0.00000 | -0.09377 |
| C  | -1.57706 | -1.27561 | 0.06326  |
| H  | -1.41119 | -2.35376 | 0.14925  |
| C  | -1.45889 | -0.71261 | -1.27718 |
| H  | -1.31653 | -1.30221 | -2.18496 |
| C  | -1.45889 | 0.71255  | -1.27722 |
| H  | -1.31653 | 1.30211  | -2.18503 |
| C  | -1.57706 | 1.27561  | 0.06320  |
| H  | -1.41119 | 2.35378  | 0.14914  |
| C  | -2.59983 | 0.66820  | 0.96167  |
| H  | -3.32214 | 1.28848  | 1.49651  |
| C  | -2.59983 | -0.66815 | 0.96171  |
| H  | -3.32214 | -1.28840 | 1.49658  |
| C  | 1.86796  | -1.14917 | 0.69123  |
| C  | 2.29081  | -0.70854 | -0.60368 |
| C  | 2.29079  | 0.70857  | -0.60368 |
| C  | 1.86794  | 1.14918  | 0.69124  |
| C  | 1.65266  | 0.00000  | 1.52113  |
| H  | 2.55018  | 1.35231  | -1.44172 |
| H  | 2.55020  | -1.35227 | -1.44173 |
| H  | 1.78419  | -2.18636 | 1.01124  |
| H  | 1.39939  | -0.00000 | 2.57845  |
| H  | 1.78416  | 2.18637  | 1.01126  |

Electronic energy (a.u.) at  $\omega$ B97X-D/def2-SVP: -529.73578

Number of imaginary frequencies: 0

**Compound 15**

|    |          |          |          |
|----|----------|----------|----------|
| Cr | -0.15945 | 0.23817  | -0.10247 |
| C  | 1.10974  | 1.49621  | 0.34549  |
| C  | 0.93382  | -0.34628 | -1.46528 |
| C  | 0.65778  | -0.95827 | 1.03546  |
| O  | 1.87927  | 2.30290  | 0.62795  |
| O  | 1.59179  | -0.71160 | -2.33494 |
| O  | 1.14083  | -1.71295 | 1.75644  |
| C  | -2.02654 | -0.84633 | -0.57364 |
| C  | -1.78072 | 0.12412  | -1.57023 |
| C  | -2.04072 | -0.45138 | 0.78252  |
| H  | -2.14493 | -1.89512 | -0.84327 |
| C  | -1.59865 | 1.48266  | -1.22863 |
| H  | -1.71115 | -0.18242 | -2.61489 |



|   |          |          |          |
|---|----------|----------|----------|
| C | -1.86022 | 0.90208  | 1.14423  |
| H | -2.17242 | -1.20397 | 1.56123  |
| C | -1.61615 | 1.85784  | 0.13303  |
| H | -1.38820 | 2.22151  | -2.00094 |
| H | -1.85064 | 1.19530  | 2.19333  |
| H | -1.41859 | 2.89476  | 0.40849  |

Electronic energy (a.u.) at  $\omega$ B97X-D/def2-SVP: -1616.0214893

Number of imaginary frequencies: 0

### Compound 16

|    |          |          |          |
|----|----------|----------|----------|
| C  | -2.29661 | -2.06822 | 0.63628  |
| C  | -1.51364 | 0.42918  | 0.69372  |
| C  | -4.02942 | -0.15478 | 0.71270  |
| O  | -2.10608 | -2.98336 | -0.03309 |
| O  | -0.82614 | 1.09904  | 0.06089  |
| O  | -4.94263 | 0.14611  | 0.07799  |
| Cr | -2.59829 | -0.62713 | 1.74796  |
| C  | 0.73733  | -2.45664 | 3.50710  |
| C  | -0.59473 | -2.76549 | 3.47207  |
| C  | -1.58334 | -1.73437 | 3.48276  |
| C  | -1.15612 | -0.36965 | 3.51413  |
| C  | 0.24394  | -0.08655 | 3.53364  |
| C  | 1.16182  | -1.10068 | 3.53825  |
| H  | -3.31567 | -3.05949 | 3.32325  |
| H  | 1.48239  | -3.25447 | 3.50546  |
| H  | -0.92605 | -3.80566 | 3.44244  |
| C  | -2.99130 | -2.02077 | 3.39606  |
| C  | -2.14847 | 0.67150  | 3.45804  |
| H  | 0.56499  | 0.95710  | 3.55187  |
| H  | 2.22868  | -0.87055 | 3.56021  |
| C  | -3.51199 | 0.36438  | 3.48344  |
| C  | -3.93684 | -0.99273 | 3.45223  |
| H  | -1.82199 | 1.71180  | 3.43311  |
| H  | -4.25127 | 1.16520  | 3.46014  |
| H  | -5.00032 | -1.22759 | 3.40509  |

Electronic energy (a.u.) at  $\omega$ B97X-D/def2-SVP: -1769.4986647

Number of imaginary frequencies: 0

### Compound 17

|   |          |          |         |
|---|----------|----------|---------|
| C | -3.41314 | -1.87613 | 0.88043 |
| C | -1.11197 | -0.67899 | 0.88158 |
| C | -3.25714 | 0.71701  | 0.66064 |
| O | -3.89446 | -2.75847 | 0.31632 |

|    |          |          |          |
|----|----------|----------|----------|
| O  | -0.13023 | -0.77068 | 0.28655  |
| O  | -3.64690 | 1.51214  | -0.07763 |
| Cr | -2.65634 | -0.52150 | 1.86231  |
| C  | -1.76384 | -1.45472 | 3.75512  |
| C  | -3.14932 | -1.77530 | 3.71326  |
| C  | -4.14733 | -0.79027 | 3.48353  |
| C  | -3.72892 | 0.55262  | 3.43256  |
| C  | -2.35359 | 0.90499  | 3.50966  |
| C  | -1.36783 | -0.09430 | 3.58889  |
| C  | -1.05695 | -2.69705 | 3.93627  |
| C  | -2.00177 | -3.67846 | 3.99983  |
| H  | -5.20018 | -1.05436 | 3.39246  |
| H  | -4.47248 | 1.33575  | 3.28152  |
| H  | -2.06145 | 1.95015  | 3.41153  |
| H  | -0.31085 | 0.17268  | 3.57597  |
| H  | 0.01875  | -2.82861 | 4.01068  |
| H  | -4.12098 | -3.65346 | 3.80195  |
| N  | -3.26053 | -3.13075 | 3.87428  |
| H  | -1.87860 | -4.75250 | 4.11820  |

Electronic energy (a.u.) at  $\omega$ B97X-D/def2-SVP: -1747.4575184

Number of imaginary frequencies: 0

## 5. Optimized Cartesian coordinates for $\sigma$ -complexes, transition state structures, and products

### Benzene + cyclopentadiene (reactants - exo)

|   |          |          |          |
|---|----------|----------|----------|
| C | -2.08692 | -0.57576 | 0.77283  |
| C | -1.80046 | 0.58228  | -0.13369 |
| C | -1.36671 | 1.66054  | 0.81190  |
| H | -1.06918 | 2.66222  | 0.50096  |
| H | -1.14557 | 1.74114  | 2.97778  |
| H | -2.42653 | -1.55243 | 0.42733  |
| H | -1.97643 | -0.83873 | 2.93271  |
| H | -2.69139 | 0.87940  | -0.71680 |
| H | -1.01530 | 0.34235  | -0.87360 |
| C | -1.40584 | 1.18749  | 2.07429  |
| C | -1.85558 | -0.20898 | 2.04990  |
| C | 1.62489  | 0.24810  | -2.12208 |
| C | 1.87259  | 0.87825  | -0.90264 |
| C | 1.68924  | 0.18277  | 0.29301  |
| C | 1.26184  | -1.14417 | 0.26905  |
| C | 1.01754  | -1.77640 | -0.95057 |
| C | 1.19691  | -1.08063 | -2.14608 |
| H | 1.76589  | 0.79350  | -3.05806 |
| H | 2.20384  | 1.91900  | -0.88296 |
| H | 1.86774  | 0.68058  | 1.24790  |
| H | 1.10629  | -1.68352 | 1.20521  |
| H | 0.67911  | -2.81487 | -0.96845 |
| H | 1.00305  | -1.57487 | -3.10083 |

Electronic energy (a.u.) at  $\omega$ B97X-D/def2-SVP: -425.9068602

Gibbs free energy correction at  $\omega$ B97X-D/def2-SVP(a.u.): 0.156211

Electronic energy (a.u.) at  $\omega$ B97X-D/def2-TZVPP: -426.3613515

Electronic energy (a.u.) at DLPNO-CCSD(T)/def2-TZVPP: -425.5501098

Number of imaginary frequencies: 0

### Benzene + cyclopentadiene (reactants - endo)

|   |          |          |          |
|---|----------|----------|----------|
| C | 1.36554  | 0.89796  | 1.10686  |
| C | 2.45123  | 0.10948  | 0.43760  |
| C | 2.20815  | -1.29053 | 0.91824  |
| H | 2.81547  | -2.15033 | 0.63416  |
| H | 0.72277  | -2.16733 | 2.24680  |
| H | 1.21780  | 1.96982  | 0.97628  |
| H | -0.25501 | 0.35226  | 2.45287  |
| H | 3.45894  | 0.47218  | 0.71089  |
| H | 2.38586  | 0.18276  | -0.66297 |

|   |          |          |          |
|---|----------|----------|----------|
| C | 1.14127  | -1.29513 | 1.74213  |
| C | 0.61494  | 0.06987  | 1.85915  |
| C | -2.22318 | 1.12105  | -0.42814 |
| C | -1.26352 | 1.59513  | -1.32131 |
| C | -0.36177 | 0.70837  | -1.91071 |
| C | -0.41896 | -0.65094 | -1.60630 |
| C | -1.37712 | -1.12419 | -0.71093 |
| C | -2.27958 | -0.23904 | -0.12299 |
| H | -2.92970 | 1.81452  | 0.03380  |
| H | -1.21742 | 2.66020  | -1.56000 |
| H | 0.38995  | 1.08055  | -2.61103 |
| H | 0.29188  | -1.34509 | -2.06016 |
| H | -1.41415 | -2.18756 | -0.46499 |
| H | -3.02964 | -0.61033 | 0.57922  |

Electronic energy (a.u.) at  $\omega$ B97X-D/def2-SVP: -425.9054269

Gibbs free energy correction (a.u.) at  $\omega$ B97X-D/def2-SVP: 0.154081

Electronic energy (a.u.) at  $\omega$ B97X-D/def2-TZVPP: -426.3598221

Electronic energy (a.u.) at DLPNO-CCSD(T)/def2-TZVPP: -425.5488272

Number of imaginary frequencies: 0

**Benzene + cyclopentadiene (Transition state - exo)**

|   |          |          |          |
|---|----------|----------|----------|
| C | -2.07147 | -1.63688 | 0.71075  |
| C | -2.07881 | -0.41670 | -0.16713 |
| C | -1.37026 | 0.54276  | 0.74770  |
| H | -1.14781 | 1.57283  | 0.46092  |
| H | -1.52392 | 0.74895  | 2.96070  |
| H | -2.48901 | -2.59385 | 0.39034  |
| H | -2.33866 | -1.78250 | 2.91783  |
| H | -3.12474 | -0.07817 | -0.29004 |
| H | -1.64058 | -0.54077 | -1.16525 |
| C | -1.71317 | 0.15839  | 2.06303  |
| C | -2.13907 | -1.16522 | 2.04060  |
| C | 0.96488  | -0.61383 | -1.86005 |
| C | 0.99264  | 0.07824  | -0.68621 |
| C | 0.45517  | -0.48133 | 0.53131  |
| C | 0.01037  | -1.86317 | 0.50799  |
| C | 0.13277  | -2.59364 | -0.73131 |
| C | 0.52536  | -1.97970 | -1.88310 |
| H | 1.33979  | -0.15527 | -2.77803 |
| H | 1.41066  | 1.08794  | -0.65396 |
| H | 0.87542  | -0.09685 | 1.46085  |
| H | 0.11815  | -2.44884 | 1.42113  |
| H | -0.11699 | -3.65801 | -0.73412 |
| H | 0.57152  | -2.54248 | -2.81834 |

Electronic energy (a.u.) at  $\omega$ B97X-D/def2-SVP: -425.8451167  
Gibbs free energy correction(a.u.) at  $\omega$ B97X-D/def2-SVP: 0.164652  
Electronic energy (a.u.) at  $\omega$ B97X-D/def2-TZVPP: -426.2951466  
Electronic energy (a.u.) at DLPNO-CCSD(T)/def2-TZVPP: -425.4910287  
Number of imaginary frequencies: 1

**Benzene + cyclopentadiene (Transition state - endo)**

|   |          |          |          |
|---|----------|----------|----------|
| C | 0.90266  | 1.08139  | 0.81537  |
| C | 1.78108  | -0.05945 | 0.37061  |
| C | 0.88513  | -1.21247 | 0.74321  |
| H | 1.15706  | -2.25415 | 0.55791  |
| H | -0.43524 | -1.43584 | 2.51965  |
| H | 1.19036  | 2.12840  | 0.69555  |
| H | -0.41504 | 1.21286  | 2.60289  |
| H | 2.67383  | -0.08678 | 1.02249  |
| H | 2.12124  | -0.02923 | -0.67276 |
| C | 0.16582  | -0.78999 | 1.87925  |
| C | 0.17643  | 0.59941  | 1.92292  |
| C | -2.74826 | 0.70653  | -0.01806 |
| C | -1.65638 | 1.39855  | -0.43929 |
| C | -0.43082 | 0.71678  | -0.77912 |
| C | -0.44151 | -0.72875 | -0.82449 |
| C | -1.67727 | -1.41232 | -0.52782 |
| C | -2.75897 | -0.73206 | -0.06343 |
| H | -3.65346 | 1.23743  | 0.28630  |
| H | -1.67760 | 2.49053  | -0.48707 |
| H | 0.24065  | 1.24026  | -1.46421 |
| H | 0.22245  | -1.21802 | -1.54146 |
| H | -1.71465 | -2.49869 | -0.64424 |
| H | -3.67212 | -1.26756 | 0.20726  |

Electronic energy (a.u.) at  $\omega$ B97X-D/def2-SVP: -425.8425095  
Gibbs free energy correction (a.u.) at  $\omega$ B97X-D/def2-SVP: 0.163643  
Electronic energy (a.u.) at  $\omega$ B97X-D/def2-TZVPP: -426.2924147  
Electronic energy (a.u.) at DLPNO-CCSD(T)/def2-TZVPP: -425.4883001  
Number of imaginary frequencies: 1

**Benzene + cyclopentadiene (Product - exo)**

|   |          |          |          |
|---|----------|----------|----------|
| C | -1.27627 | -0.77623 | 0.56301  |
| C | -1.54747 | 0.50143  | -0.24821 |
| C | -0.59084 | 1.35672  | 0.59878  |
| H | -0.52052 | 2.42548  | 0.35635  |
| H | -0.97720 | 1.66259  | 2.86724  |
| H | -1.83918 | -1.67801 | 0.28753  |
| H | -1.79061 | -0.86864 | 2.82479  |

|   |          |          |          |
|---|----------|----------|----------|
| H | -2.59233 | 0.83604  | -0.17892 |
| H | -1.24792 | 0.42289  | -1.30446 |
| C | -1.06867 | 1.01322  | 1.99502  |
| C | -1.47825 | -0.26134 | 1.97365  |
| C | 1.68487  | 0.26125  | -1.92452 |
| C | 1.48020  | 1.03665  | -0.85187 |
| C | 0.76017  | 0.57319  | 0.38364  |
| C | 0.28032  | -0.92002 | 0.35859  |
| C | 0.60773  | -1.67828 | -0.89743 |
| C | 1.23618  | -1.13499 | -1.94795 |
| H | 2.20784  | 0.65774  | -2.79826 |
| H | 1.83685  | 2.07158  | -0.84862 |
| H | 1.41789  | 0.75837  | 1.24749  |
| H | 0.69867  | -1.47977 | 1.20993  |
| H | 0.29484  | -2.72680 | -0.92913 |
| H | 1.43888  | -1.73508 | -2.83842 |

Electronic energy (a.u.) at  $\omega$ B97X-D/def2-SVP: -425.8942482

Gibbs free energy correction (a.u.) at  $\omega$ B97X-D/def2-SVP: 0.168771

Electronic energy (a.u.) at  $\omega$ B97X-D/def2-TZVPP: -426.3417532

Electronic energy (a.u.) at DLPNO-CCSD(T)/def2-TZVPP: -425.5365039

Number of imaginary frequencies: 0

### **Benzene + cyclopentadiene (Product - endo)**

|   |          |          |          |
|---|----------|----------|----------|
| C | 1.27084  | 1.10293  | 0.31834  |
| C | 2.28721  | -0.01860 | 0.04894  |
| C | 1.25412  | -1.13955 | 0.24794  |
| H | 1.61195  | -2.17528 | 0.17709  |
| H | 0.18994  | -1.39987 | 2.29662  |
| H | 1.64409  | 2.13562  | 0.31243  |
| H | 0.20970  | 1.25006  | 2.37982  |
| H | 3.09466  | -0.04802 | 0.79417  |
| H | 2.71650  | 0.01004  | -0.96521 |
| C | 0.65216  | -0.72386 | 1.57669  |
| C | 0.66213  | 0.61372  | 1.61868  |
| C | -2.23899 | 0.76332  | -0.39335 |
| C | -1.11061 | 1.45937  | -0.58222 |
| C | 0.22119  | 0.80766  | -0.81614 |
| C | 0.20952  | -0.75810 | -0.86529 |
| C | -1.13197 | -1.40328 | -0.67209 |
| C | -2.24993 | -0.70371 | -0.43940 |
| H | -3.18268 | 1.28494  | -0.21507 |
| H | -1.12970 | 2.55368  | -0.55857 |
| H | 0.63723  | 1.20528  | -1.75736 |
| H | 0.62002  | -1.10206 | -1.82980 |

|   |          |          |          |
|---|----------|----------|----------|
| H | -1.16737 | -2.49651 | -0.71712 |
| H | -3.20137 | -1.22136 | -0.29375 |

Electronic energy (a.u.) at  $\omega$ B97X-D/def2-SVP: -425.8943196

Gibbs free energy correction (a.u.) at  $\omega$ B97X-D/def2-SVP: 0.168798

Electronic energy (a.u.) at  $\omega$ B97X-D/def2-TZVPP: -426.3411221

Electronic energy (a.u.) at DLPNO-CCSD(T)/def2-TZVPP: -425.5361987

Number of imaginary frequencies: 0

**p-nitro-aniline + cyclopentadiene (reactants - exo)**

|   |          |          |          |
|---|----------|----------|----------|
| C | -0.91218 | 1.54839  | 1.66976  |
| C | 0.02082  | 1.57734  | 2.64356  |
| C | 1.22529  | 2.24326  | 2.13566  |
| C | 1.01935  | 2.61523  | 0.85526  |
| H | -0.37075 | 1.55438  | -0.43529 |
| H | -0.08758 | 1.16839  | 3.64916  |
| H | 2.13668  | 2.40440  | 2.71400  |
| C | -0.36725 | 2.22033  | 0.44607  |
| H | -0.97362 | 3.10019  | 0.16196  |
| C | 1.86324  | -0.20553 | -1.18697 |
| C | 0.90860  | -0.32907 | -2.21853 |
| C | -0.34234 | -0.86733 | -1.96375 |
| C | -0.65754 | -1.28631 | -0.67277 |
| C | 0.27330  | -1.19108 | 0.36135  |
| C | 1.52473  | -0.66196 | 0.10374  |
| H | 1.15502  | 0.01514  | -3.22552 |
| H | -1.09039 | -0.96041 | -2.75069 |
| H | 2.24751  | -0.56549 | 0.91582  |
| N | -1.99183 | -1.80491 | -0.39161 |
| O | -2.26566 | -2.06485 | 0.76305  |
| O | -2.75583 | -1.94024 | -1.32568 |
| N | 3.07460  | 0.38164  | -1.42249 |
| H | 3.79658  | 0.32087  | -0.72010 |
| H | 3.38309  | 0.52001  | -2.37330 |
| H | -1.90571 | 1.10407  | 1.73454  |
| H | 1.72793  | 3.12442  | 0.20172  |
| H | -0.00514 | -1.52115 | 1.36095  |

Electronic energy (a.u.) at  $\omega$ B97xd/def2-SVP (a.u.) : -685.4982238

Gibbs free energy correction (a.u.) at  $\omega$ B97X-D/def2-SVP: 0.171609

Electronic energy (a.u.) at  $\omega$ B97X-D/def2-TZVPP: -686.2571581

Electronic energy (a.u.) at DLPNO-CCSD(T)/def2-TZVPP: -685.0657224

Number of imaginary frequencies: 0

**p-nitro-aniline + cyclopentadiene (reactants - endo)**

|   |          |          |          |
|---|----------|----------|----------|
| C | 0.65672  | 2.19520  | 2.23219  |
| C | 1.10793  | 2.61041  | 1.03093  |
| C | 0.05758  | 2.41254  | 0.02628  |
| C | -1.02801 | 1.87970  | 0.62337  |
| H | -0.84872 | 0.63601  | 2.39468  |
| H | 2.09468  | 3.02724  | 0.82267  |
| H | 0.15773  | 2.65320  | -1.03298 |
| C | -0.74744 | 1.69262  | 2.08402  |
| H | -1.45703 | 2.25813  | 2.71528  |
| C | 1.78648  | -0.28088 | -1.60085 |
| C | 0.52283  | -0.58350 | -2.15109 |
| C | -0.49689 | -1.06831 | -1.35284 |
| C | -0.26951 | -1.25750 | 0.00955  |
| C | 0.97473  | -0.98721 | 0.57488  |
| C | 1.99470  | -0.50638 | -0.22532 |
| H | 0.34631  | -0.42107 | -3.21681 |
| H | -1.47999 | -1.29367 | -1.76487 |
| H | 2.96497  | -0.27433 | 0.21871  |
| N | -1.36067 | -1.71429 | 0.85880  |
| O | -1.15569 | -1.79024 | 2.05665  |
| O | -2.41926 | -1.98493 | 0.33056  |
| N | 2.77801  | 0.25019  | -2.37971 |
| H | 3.72207  | 0.27071  | -2.02277 |
| H | 2.68705  | 0.20931  | -3.38427 |
| H | 1.20316  | 2.21465  | 3.17551  |
| H | -1.96872 | 1.60868  | 0.14317  |
| H | 1.12339  | -1.14193 | 1.64288  |

Electronic energy (a.u.) at  $\omega$ B97xd/def2-SVP: -685.4990062

Gibbs free energy (a.u.) correction at  $\omega$ B97X-D/def2-SVP: 0.172197

Electronic energy (a.u.) at  $\omega$ B97X-D/def2-TZVPP: -686.2570728

Electronic energy (a.u.) at DLPNO-CCSD(T)/def2-TZVPP: -685.0662158

Number of imaginary frequencies: 0

**p-nitro-aniline + cyclopentadiene (Transition state - exo)**

|   |         |         |          |
|---|---------|---------|----------|
| C | 0.68358 | 3.40874 | 0.78520  |
| C | 1.43526 | 3.65589 | 1.95631  |
| C | 2.64391 | 4.24691 | 1.59804  |
| C | 2.66876 | 4.39794 | 0.19989  |
| H | 1.09397 | 4.02580 | -1.30905 |
| H | 1.17266 | 3.29851 | 2.95285  |
| H | 3.48714 | 4.42391 | 2.26730  |
| C | 1.24599 | 4.32917 | -0.26586 |
| H | 0.78723 | 5.32685 | -0.13261 |



|   |          |         |          |
|---|----------|---------|----------|
| C | 3.30189  | 2.38438 | -1.70704 |
| C | 2.38335  | 2.07437 | -2.70052 |
| C | 1.13192  | 1.52183 | -2.35829 |
| C | 0.79222  | 1.32256 | -1.04615 |
| C | 1.63490  | 1.75802 | 0.04524  |
| C | 2.92983  | 2.27999 | -0.31814 |
| H | 2.65054  | 2.19930 | -3.75168 |
| H | 0.42704  | 1.21708 | -3.13217 |
| H | 3.75260  | 2.13818 | 0.38365  |
| N | -0.46599 | 0.68625 | -0.72748 |
| O | -0.76549 | 0.59463 | 0.45307  |
| O | -1.16284 | 0.27555 | -1.63662 |
| N | 4.55421  | 2.85009 | -2.00703 |
| H | 5.24996  | 2.85828 | -1.27446 |
| H | 4.90889  | 2.71088 | -2.94277 |
| H | -0.36275 | 3.09988 | 0.81324  |
| H | 3.45661  | 4.91176 | -0.35479 |
| H | 1.55151  | 1.16938 | 0.95698  |

Electronic energy (a.u.) at  $\omega$ B97xd/def2-SVP: -685.4452332

Gibbs free energy correction(a.u.) at  $\omega$ B97X-D/def2-SVP: 0.179279

Electronic energy (a.u.) at  $\omega$ B97X-D/def2-TZVPP: -686.199347

Electronic energy (a.u.) at DLPNO-CCSD(T)/def2-TZVPP: -685.0140307

Number of imaginary frequencies: 1

**p-nitro-aniline + cyclopentadiene (Transition state - endo)**

|   |          |         |          |
|---|----------|---------|----------|
| C | 2.75524  | 4.40308 | 0.32725  |
| C | 1.83044  | 4.80752 | -0.64495 |
| C | 0.59836  | 4.22909 | -0.35183 |
| C | 0.72957  | 3.42809 | 0.80599  |
| H | 2.45770  | 3.23663 | 2.19085  |
| H | 2.07343  | 5.35279 | -1.55711 |
| H | -0.28226 | 4.26070 | -0.99407 |
| C | 1.95979  | 3.94319 | 1.51445  |
| H | 1.66763  | 4.83169 | 2.10427  |
| C | 3.35082  | 2.31516 | -1.62196 |
| C | 2.44094  | 1.96728 | -2.60760 |
| C | 1.19445  | 1.39907 | -2.25931 |
| C | 0.84540  | 1.23814 | -0.94805 |
| C | 1.65798  | 1.77351 | 0.12262  |
| C | 2.96399  | 2.25567 | -0.23690 |
| H | 2.71228  | 2.06480 | -3.66074 |
| H | 0.50685  | 1.05149 | -3.03099 |
| H | 3.77290  | 2.15523 | 0.49065  |
| N | -0.41182 | 0.62008 | -0.60985 |

|   |          |         |          |
|---|----------|---------|----------|
| O | -0.72266 | 0.58816 | 0.57204  |
| O | -1.10188 | 0.16289 | -1.50265 |
| N | 4.59740  | 2.79118 | -1.92842 |
| H | 5.28580  | 2.84221 | -1.19102 |
| H | 4.96411  | 2.62107 | -2.85431 |
| H | 3.77996  | 4.77475 | 0.39003  |
| H | -0.12842 | 3.01380 | 1.33910  |
| H | 1.55263  | 1.26382 | 1.08150  |

Electronic energy (a.u.) at  $\omega$ B97xd/def2-SVP: -685.4439155

Gibbs free energy correction (a.u.) at  $\omega$ B97X-D/def2-SVP : 0.178712

Electronic energy (a.u.) at  $\omega$ B97X-D/def2-TZVPP: -686.1982654

Electronic energy (a.u.) at DLPNO-CCSD(T)/def2-TZVPP: -685.0124854

Number of imaginary frequencies: 1

**p-nitro-aniline + cyclopentadiene (Product - exo)**

|   |          |          |          |
|---|----------|----------|----------|
| C | -0.75113 | 0.93692  | 1.21391  |
| C | -0.03517 | 1.26925  | 2.50556  |
| C | 1.16823  | 1.75775  | 2.18194  |
| C | 1.25997  | 1.75795  | 0.66944  |
| H | -0.42323 | 1.86629  | -0.77506 |
| H | -0.40907 | 1.03607  | 3.50333  |
| H | 1.98605  | 2.00916  | 2.85916  |
| C | -0.20266 | 2.03438  | 0.29055  |
| H | -0.53119 | 3.04137  | 0.58313  |
| C | 1.77603  | 0.12610  | -1.22235 |
| C | 0.94590  | -0.40846 | -2.16442 |
| C | -0.32024 | -0.96472 | -1.78781 |
| C | -0.75894 | -0.95667 | -0.51172 |
| C | -0.02015 | -0.33294 | 0.63096  |
| C | 1.38221  | 0.24452  | 0.23152  |
| H | 1.26333  | -0.46818 | -3.20715 |
| H | -0.94773 | -1.44401 | -2.54069 |
| H | 2.18004  | -0.24169 | 0.81585  |
| N | -2.00451 | -1.62314 | -0.19607 |
| O | -2.32044 | -1.67856 | 0.98231  |
| O | -2.66947 | -2.09785 | -1.09787 |
| N | 3.00697  | 0.61791  | -1.51959 |
| H | 3.64481  | 0.87421  | -0.78091 |
| H | 3.39364  | 0.49789  | -2.44459 |
| H | -1.83678 | 0.81086  | 1.28010  |
| H | 2.02579  | 2.40849  | 0.22780  |
| H | 0.07832  | -1.08264 | 1.42734  |

Electronic energy (a.u.) at  $\omega$ B97xd/def2-SVP: -685.4955309

Gibbs free energy correction (a.u.) at  $\omega$ B97X-D/def2-SVP: 0.183783

Electronic energy (a.u.) at  $\omega$ B97X-D/def2-TZVPP: -686.2465297  
Electronic energy (a.u.) at DLPNO-CCSD(T)/def2-TZVPP: -685.0588441  
Number of imaginary frequencies: 0

**p-nitro-aniline + cyclopentadiene (Product - endo)**

|   |          |          |          |
|---|----------|----------|----------|
| C | 1.35069  | 1.70060  | 0.86976  |
| C | 0.33936  | 2.36546  | -0.04443 |
| C | -0.86594 | 1.88471  | 0.28378  |
| C | -0.67099 | 0.90083  | 1.42014  |
| H | 0.97945  | 0.89058  | 2.90402  |
| H | 0.58665  | 3.01448  | -0.88492 |
| H | -1.80898 | 2.06774  | -0.23206 |
| C | 0.51696  | 1.54620  | 2.14943  |
| H | 0.26240  | 2.51359  | 2.60400  |
| C | 1.86176  | 0.05116  | -1.02461 |
| C | 1.04508  | -0.50932 | -1.96207 |
| C | -0.23295 | -1.04437 | -1.59248 |
| C | -0.69765 | -1.00359 | -0.32625 |
| C | 0.03542  | -0.36492 | 0.81045  |
| C | 1.44381  | 0.19411  | 0.41713  |
| H | 1.37296  | -0.58932 | -3.00024 |
| H | -0.85449 | -1.52964 | -2.34664 |
| H | 2.21921  | -0.30088 | 1.02687  |
| N | -1.96058 | -1.63673 | -0.02099 |
| O | -2.29760 | -1.66223 | 1.15305  |
| O | -2.62134 | -2.11481 | -0.92440 |
| N | 3.08982  | 0.55397  | -1.31462 |
| H | 3.71409  | 0.83310  | -0.57295 |
| H | 3.48859  | 0.42772  | -2.23364 |
| H | 2.32521  | 2.19841  | 0.96243  |
| H | -1.55708 | 0.64363  | 2.00915  |
| H | 0.14000  | -1.10424 | 1.61844  |

Electronic energy (a.u.) at  $\omega$ B97xd/def2-SVP: -685.49683  
Gibbs free energy correction (a.u.) at  $\omega$ B97X-D/def2-SVP: 0.183756  
Electronic energy (a.u.) at  $\omega$ B97X-D/def2-TZVPP: -686.2473162  
Electronic energy (a.u.) at DLPNO-CCSD(T)/def2-TZVPP: -685.0600698  
Number of imaginary frequencies: 0

**1 + NMN (reactants - exo)**

|   |             |             |             |
|---|-------------|-------------|-------------|
| W | 0.76533400  | -0.15043400 | -0.30291900 |
| P | 0.88541800  | -2.63526800 | 0.05764900  |
| O | -0.03415900 | -0.66515200 | -3.10106800 |
| N | 1.56634700  | 0.18171600  | 1.85616100  |
| N | 2.70241300  | 0.87252500  | 2.04900400  |
| N | 2.95211100  | -0.27454000 | -0.80651300 |

|   |             |             |             |
|---|-------------|-------------|-------------|
| N | 3.89224400  | 0.41211000  | -0.13539800 |
| N | 1.42442000  | 2.00121500  | -0.51661800 |
| N | 2.52918700  | 2.46280900  | 0.09922100  |
| N | 0.27670900  | -0.43313400 | -1.97292300 |
| C | -1.27176000 | -0.57437700 | 0.59631800  |
| C | -1.10922800 | 0.85781000  | 0.33493700  |
| C | -1.97157900 | 1.46591300  | -0.66696400 |
| C | -2.78201800 | 0.72178900  | -1.46575300 |
| C | -2.93237800 | -0.68800400 | -1.22288600 |
| C | -2.27748200 | -1.27955900 | -0.18951200 |
| C | 2.98546700  | 0.94472100  | 3.36042300  |
| C | 1.99368100  | 0.27358000  | 4.05920700  |
| C | 1.12530200  | -0.18386600 | 3.06132100  |
| C | 5.09573800  | 0.21298000  | -0.70219700 |
| C | 4.93538600  | -0.63936500 | -1.78387700 |
| C | 3.56011000  | -0.90387100 | -1.81167100 |
| C | 2.73906700  | 3.74853000  | -0.24210800 |
| C | 1.73558300  | 4.13904300  | -1.11255300 |
| C | 0.93734500  | 2.99515000  | -1.25538500 |
| C | 0.17377200  | -3.57129000 | -1.34058000 |
| C | 0.07877500  | -3.39900000 | 1.52063600  |
| C | 2.57343200  | -3.34327900 | 0.23145000  |
| B | 3.46695000  | 1.50870300  | 0.87021400  |
| H | -1.18719100 | -0.91325700 | 1.63564900  |
| H | 4.43931600  | 2.10402000  | 1.28236700  |
| H | -0.84021300 | 1.50190100  | 1.18170300  |
| H | -1.97306500 | 2.55498700  | -0.76211200 |
| H | -3.39174800 | 1.20531500  | -2.23160100 |
| H | -3.65265200 | -1.26157200 | -1.81043900 |
| H | -2.52519800 | -2.31271900 | 0.07348400  |
| H | 3.87094100  | 1.47250700  | 3.70581200  |
| H | 1.90851700  | 0.13961500  | 5.13332700  |
| H | 0.20154000  | -0.74890600 | 3.16054900  |
| H | 5.98045100  | 0.70512900  | -0.30576800 |
| H | 5.69972100  | -1.00394700 | -2.46345400 |
| H | 2.97573000  | -1.49855100 | -2.51146700 |
| H | 3.59300700  | 4.29180100  | 0.15499900  |
| H | 1.60091400  | 5.10902200  | -1.58158100 |
| H | 0.04623100  | 2.83398700  | -1.85704300 |
| H | -0.87984600 | -3.28145700 | -1.45627600 |
| H | 0.68855900  | -3.27811700 | -2.26625600 |
| H | 0.25438200  | -4.65794000 | -1.19149300 |
| H | 0.51991200  | -2.98482900 | 2.43852400  |
| H | -0.99868900 | -3.19114600 | 1.52144600  |
| H | 0.23108100  | -4.48838000 | 1.51690600  |
| H | 3.09860900  | -2.81751000 | 1.04275600  |

|   |             |             |             |
|---|-------------|-------------|-------------|
| H | 3.14854800  | -3.19509900 | -0.69092900 |
| H | 2.53099900  | -4.41853200 | 0.45961000  |
| C | -5.30572000 | -0.63907200 | 0.87855100  |
| C | -4.35258600 | 0.06658100  | 1.79718300  |
| H | -3.81216800 | -0.45915800 | 2.58142500  |
| C | -4.31312100 | 1.35812600  | 1.46510800  |
| H | -3.73149900 | 2.16550300  | 1.90508200  |
| C | -5.24225000 | 1.58321500  | 0.30751000  |
| N | -5.79266700 | 0.33880000  | 0.01514900  |
| O | -5.50071600 | 2.61104500  | -0.26298800 |
| C | -6.68982800 | 0.08867700  | -1.08254800 |
| H | -7.51617300 | 0.81242500  | -1.07256500 |
| H | -6.16470600 | 0.16814800  | -2.04694500 |
| H | -7.08397800 | -0.92905200 | -0.96916400 |
| O | -5.62158400 | -1.80134600 | 0.87497900  |

Electronic energy (a.u.) at  $\omega$ B97xd/def2-SVP: -1989.952497

Gibbs free energy correction (a.u.) at  $\omega$ B97X-D/def2-SVP: 0.458152

Electronic energy (a.u.) at  $\omega$ B97X-D/def2-TZVPP: -1989.95249741

Electronic energy (a.u.) at DLPNO-CCSD(T)/def2-TZVPP: -1988.332061

Number of imaginary frequencies: 0

### **1 + NMN (reactants - endo)**

|   |             |             |             |
|---|-------------|-------------|-------------|
| W | -0.68132000 | 0.40294700  | -0.37541300 |
| P | -1.19305200 | 2.35877900  | 1.11615400  |
| O | -1.23496200 | 2.10356200  | -2.72930600 |
| N | -0.40255400 | -0.92425400 | 1.52199500  |
| N | -1.18566900 | -2.00439100 | 1.69450600  |
| N | -2.84624100 | -0.14379000 | -0.13532900 |
| N | -3.24441400 | -1.31533300 | 0.38789600  |
| N | -0.85826400 | -1.63247300 | -1.34313300 |
| N | -1.48110400 | -2.65143900 | -0.72167800 |
| N | -0.99668700 | 1.40046800  | -1.79436200 |
| C | 1.37969500  | 1.22390000  | 0.03767100  |
| C | 1.45937900  | 0.01301600  | -0.78538300 |
| C | 2.00826100  | 0.13338000  | -2.12656200 |
| C | 2.30194300  | 1.34148000  | -2.67506900 |
| C | 2.20050400  | 2.53917800  | -1.88118300 |
| C | 1.82814000  | 2.46794600  | -0.57747900 |
| C | -0.86019900 | -2.63606100 | 2.83516900  |
| C | 0.17921500  | -1.94351100 | 3.43588500  |
| C | 0.43059400  | -0.87633100 | 2.56475400  |
| C | -4.58547100 | -1.40572800 | 0.33817800  |
| C | -5.08218600 | -0.24611200 | -0.23723200 |
| C | -3.93902700 | 0.50898600  | -0.52955100 |

|   |             |             |             |
|---|-------------|-------------|-------------|
| C | -1.49788400 | -3.73348600 | -1.52290700 |
| C | -0.86410400 | -3.40800300 | -2.71034600 |
| C | -0.48505800 | -2.06847400 | -2.54376400 |
| C | -1.33154800 | 3.92692900  | 0.18828800  |
| C | -0.05421800 | 2.78044100  | 2.49375300  |
| C | -2.77970200 | 2.27350300  | 2.04149000  |
| B | -2.20750100 | -2.43887600 | 0.62526200  |
| H | 1.61390100  | 1.13994200  | 1.10220000  |
| H | -2.76372000 | -3.45777200 | 0.97570200  |
| H | 1.66574300  | -0.93760700 | -0.28115700 |
| H | 2.21121700  | -0.78387500 | -2.68550900 |
| H | 2.67968200  | 1.40622000  | -3.69779800 |
| H | 2.49737000  | 3.49639100  | -2.31573600 |
| H | 1.87613600  | 3.36900900  | 0.04318800  |
| H | -1.38830100 | -3.53746600 | 3.13620200  |
| H | 0.68892200  | -2.17600000 | 4.36601100  |
| H | 1.19977700  | -0.10962000 | 2.64130000  |
| H | -5.09205200 | -2.29662800 | 0.70114200  |
| H | -6.11948700 | 0.00934300  | -0.43142400 |
| H | -3.84486500 | 1.47772300  | -1.01689400 |
| H | -1.96547700 | -4.65736900 | -1.19150600 |
| H | -0.70062400 | -4.04485200 | -3.57439800 |
| H | 0.02872900  | -1.39609900 | -3.22634100 |
| H | -0.38323300 | 4.11141500  | -0.33502500 |
| H | -2.10578100 | 3.81631000  | -0.58389400 |
| H | -1.57375300 | 4.77457700  | 0.84600500  |
| H | 0.01855800  | 1.92460100  | 3.17977100  |
| H | 0.95157000  | 3.00598500  | 2.11766700  |
| H | -0.43232700 | 3.65057500  | 3.05036100  |
| H | -2.80860500 | 1.33361400  | 2.61258800  |
| H | -3.62948600 | 2.27092700  | 1.34766700  |
| H | -2.88204500 | 3.12388400  | 2.73172700  |
| C | 4.55406900  | -1.14454600 | -0.44868800 |
| C | 4.92769600  | 0.28437800  | -0.71553100 |
| H | 5.34382500  | 0.60568000  | -1.66753200 |
| C | 4.64348200  | 1.00586700  | 0.36984900  |
| H | 4.76323800  | 2.07389600  | 0.53659500  |
| C | 4.04887800  | 0.09776200  | 1.40503300  |
| N | 4.06283400  | -1.17626600 | 0.85730200  |
| O | 3.62033700  | 0.38763000  | 2.49691300  |
| C | 3.49876100  | -2.34763700 | 1.47884400  |
| H | 3.49238000  | -2.19578200 | 2.56535100  |
| H | 2.46426900  | -2.52334700 | 1.14185300  |
| H | 4.10766600  | -3.22441400 | 1.22370600  |
| O | 4.64151200  | -2.09663500 | -1.17780400 |

Electronic energy (a.u.) at  $\omega$ B97xd/def2-SVP: -1989.959408  
Gibbs free energy correction (a.u.) at  $\omega$ B97X-D/def2-SVP: 0.460797  
Electronic energy (a.u.) at  $\omega$ B97X-D/def2-TZVPP: -1989.95940825  
Electronic energy (a.u.) at DLPNO-CCSD(T)/def2-TZVPP: -1988.337154  
Number of imaginary frequencies: 0

**1 + NMN (Transition state - exo)**

|   |             |             |             |
|---|-------------|-------------|-------------|
| W | -0.69876400 | 0.13741100  | -0.26401200 |
| P | -0.80937000 | 2.63556000  | 0.03166800  |
| O | 0.15021400  | 0.63434700  | -3.04887100 |
| N | -1.65897800 | -0.13647400 | 1.83847900  |
| N | -2.82203700 | -0.79934200 | 1.96115000  |
| N | -2.84546300 | 0.27138900  | -0.92748100 |
| N | -3.84504900 | -0.38485100 | -0.31498500 |
| N | -1.36630300 | -2.01209900 | -0.45469700 |
| N | -2.52587100 | -2.44195400 | 0.07672300  |
| N | -0.15032000 | 0.39928600  | -1.91761100 |
| C | 1.24072600  | 0.56993800  | 0.77423400  |
| C | 1.10419400  | -0.86379600 | 0.49731200  |
| C | 2.14617800  | -1.42598800 | -0.36710000 |
| C | 2.74198100  | -0.62803600 | -1.36078000 |
| C | 2.86951600  | 0.72478500  | -1.10502200 |
| C | 2.40582200  | 1.19880400  | 0.13629200  |
| C | -3.20306900 | -0.83450800 | 3.24889400  |
| C | -2.25170500 | -0.16732600 | 4.00509700  |
| C | -1.30147200 | 0.24815100  | 3.06573400  |
| C | -4.99460500 | -0.19542100 | -0.98670100 |
| C | -4.73560600 | 0.61959500  | -2.07828800 |
| C | -3.36003400 | 0.87124000  | -2.00059000 |
| C | -2.70141200 | -3.74642100 | -0.20453300 |
| C | -1.61715100 | -4.18354200 | -0.94740200 |
| C | -0.80764800 | -3.04711500 | -1.07804400 |
| C | 0.10680300  | 3.52428700  | -1.27507500 |
| C | -0.17684000 | 3.39866400  | 1.57604700  |
| C | -2.48278900 | 3.39213400  | -0.03769600 |
| B | -3.50922700 | -1.45723100 | 0.74689200  |
| H | 1.10114800  | 0.88510100  | 1.81522800  |
| H | -4.51544300 | -2.03186500 | 1.10242800  |
| H | 0.81344500  | -1.50909700 | 1.33635700  |
| H | 2.20189100  | -2.51303400 | -0.46901100 |
| H | 3.25836500  | -1.09093100 | -2.20359200 |
| H | 3.49309300  | 1.35822100  | -1.73872700 |
| H | 2.66953600  | 2.22049400  | 0.42726800  |
| H | -4.12269200 | -1.33664800 | 3.53878900  |
| H | -2.24306100 | -0.01032200 | 5.07940100  |
| H | -0.37603200 | 0.79653200  | 3.22361600  |

|   |             |             |             |
|---|-------------|-------------|-------------|
| H | -5.91446900 | -0.66761000 | -0.65046700 |
| H | -5.43693900 | 0.96760400  | -2.83057200 |
| H | -2.71134200 | 1.43179700  | -2.67161500 |
| H | -3.58910100 | -4.27029800 | 0.14127100  |
| H | -1.43733000 | -5.17928400 | -1.34113300 |
| H | 0.14202400  | -2.92101800 | -1.59204900 |
| H | 1.17228200  | 3.26894700  | -1.19730000 |
| H | -0.23645700 | 3.17102700  | -2.25774100 |
| H | -0.02331700 | 4.61331000  | -1.19499900 |
| H | -0.75117600 | 3.02150300  | 2.43414900  |
| H | 0.88218500  | 3.14986200  | 1.72121900  |
| H | -0.28305600 | 4.49254700  | 1.53285900  |
| H | -3.13544100 | 2.89117900  | 0.69244800  |
| H | -2.92367000 | 3.25394400  | -1.03270600 |
| H | -2.43848000 | 4.46783500  | 0.18785100  |
| C | 5.12244000  | 0.65555000  | 0.73594200  |
| C | 3.88592400  | 0.16360400  | 1.40254500  |
| H | 3.51636800  | 0.67246300  | 2.29057900  |
| C | 3.76960900  | -1.20210800 | 1.14034600  |
| H | 3.28595100  | -1.93505100 | 1.78232900  |
| C | 4.92739700  | -1.60474200 | 0.29719300  |
| N | 5.63138800  | -0.43010900 | 0.02266500  |
| O | 5.23941600  | -2.69890200 | -0.10856200 |
| C | 6.77980500  | -0.36640000 | -0.84235500 |
| H | 7.43013900  | -1.23278700 | -0.66101800 |
| H | 6.48166500  | -0.37018100 | -1.90256400 |
| H | 7.31834700  | 0.56465300  | -0.62434100 |
| O | 5.61496900  | 1.75910300  | 0.76036400  |

Electronic energy (a.u.) at  $\omega$ B97xd/def2-SVP: -1989.925831

Gibbs free energy correction (a.u.) at  $\omega$ B97X-D/def2-SVP: 0.464007

Electronic energy (a.u.) at  $\omega$ B97X-D/def2-TZVPP: -1989.92583080

Electronic energy (a.u.) at DLPNO-CCSD(T)/def2-TZVPP: -1988.306531

Number of imaginary frequencies: 1

### 1 + NMN (Transition state - endo)

|   |             |             |             |
|---|-------------|-------------|-------------|
| W | -0.59576100 | 0.34357500  | -0.37793000 |
| P | -0.66975900 | 2.48947400  | 0.94064100  |
| O | -0.89737200 | 1.97522300  | -2.82293200 |
| N | -0.62679800 | -0.84370200 | 1.62595000  |
| N | -1.60314800 | -1.73905600 | 1.85563900  |
| N | -2.83011200 | 0.27600800  | -0.13512800 |
| N | -3.46766400 | -0.74461400 | 0.46313300  |
| N | -1.18468200 | -1.68067200 | -1.18554400 |
| N | -2.01433200 | -2.49661700 | -0.50966800 |
| N | -0.73917800 | 1.28788900  | -1.85846000 |



|   |             |             |             |
|---|-------------|-------------|-------------|
| C | 1.55727100  | 0.73110000  | 0.04697500  |
| C | 1.40024000  | -0.50564400 | -0.73202500 |
| C | 2.08171800  | -0.50771100 | -2.02357300 |
| C | 2.24191500  | 0.69755200  | -2.73745900 |
| C | 2.39120800  | 1.85898000  | -2.00780500 |
| C | 2.38980900  | 1.74891100  | -0.60120600 |
| C | -1.42751600 | -2.32058500 | 3.05373700  |
| C | -0.28959300 | -1.78489600 | 3.63713600  |
| C | 0.17473400  | -0.86146100 | 2.69379000  |
| C | -4.79752600 | -0.56203400 | 0.38151400  |
| C | -5.03710500 | 0.62550700  | -0.29323800 |
| C | -3.75966600 | 1.10462000  | -0.60949000 |
| C | -2.21876500 | -3.62536100 | -1.21346900 |
| C | -1.49673500 | -3.54231700 | -2.39261800 |
| C | -0.86507000 | -2.29349300 | -2.32301500 |
| C | -0.31421900 | 3.94850300  | -0.10043700 |
| C | 0.44422900  | 2.70627100  | 2.38333600  |
| C | -2.28017300 | 2.92275800  | 1.71364300  |
| B | -2.68889800 | -2.03760200 | 0.80145800  |
| H | 1.77192900  | 0.62406200  | 1.11331200  |
| H | -3.44399200 | -2.89044100 | 1.21584900  |
| H | 1.44849300  | -1.45993200 | -0.19297500 |
| H | 2.15126900  | -1.45992200 | -2.55598200 |
| H | 2.42953000  | 0.68307700  | -3.81304600 |
| H | 2.70435500  | 2.78702700  | -2.49098300 |
| H | 2.67987900  | 2.61773100  | -0.00272800 |
| H | -2.12259400 | -3.07836300 | 3.40663200  |
| H | 0.14444100  | -2.02859600 | 4.60207900  |
| H | 1.05297500  | -0.22147000 | 2.74058600  |
| H | -5.48184900 | -1.29882000 | 0.79502300  |
| H | -5.99691700 | 1.07165900  | -0.53534700 |
| H | -3.46175900 | 1.98805100  | -1.17144200 |
| H | -2.86664000 | -4.40736100 | -0.82529800 |
| H | -1.43424100 | -4.27818700 | -3.18845700 |
| H | -0.20207100 | -1.80477600 | -3.03257300 |
| H | 0.71779600  | 3.88223300  | -0.46896800 |
| H | -0.97217500 | 3.92657300  | -0.98088100 |
| H | -0.45216100 | 4.88718700  | 0.45569700  |
| H | 0.16424600  | 1.98582200  | 3.16531100  |
| H | 1.49452700  | 2.53350800  | 2.11304700  |
| H | 0.34145400  | 3.72278500  | 2.79077900  |
| H | -2.63202800 | 2.07438600  | 2.31876700  |
| H | -3.03322600 | 3.12144000  | 0.94089300  |
| H | -2.18180400 | 3.81279800  | 2.35260200  |
| C | 4.07588700  | -1.62748900 | -0.32302400 |
| C | 4.20657800  | -0.47183700 | -1.24657600 |

|   |            |             |             |
|---|------------|-------------|-------------|
| H | 4.64947200 | -0.62121700 | -2.22820700 |
| C | 4.31020700 | 0.68774000  | -0.47054600 |
| H | 4.88704600 | 1.57203700  | -0.73215900 |
| C | 4.21782900 | 0.28228700  | 0.96204000  |
| N | 4.03700300 | -1.09680600 | 0.97035200  |
| O | 4.23494700 | 0.97904800  | 1.95254100  |
| C | 3.75641800 | -1.87989900 | 2.14390000  |
| H | 3.91565600 | -1.23897100 | 3.02065200  |
| H | 2.71683900 | -2.24545400 | 2.13909500  |
| H | 4.42702000 | -2.74885300 | 2.19162300  |
| O | 3.98667700 | -2.80585300 | -0.57041500 |

Electronic energy (a.u.) at  $\omega$ B97xd/def2-SVP: -1989.928305

Gibbs free energy correction (a.u.) at  $\omega$ B97X-D/def2-SVP: 0.465971

Electronic energy (a.u.) at  $\omega$ B97X-D/def2-TZVPP: -1989.92830522

Electronic energy (a.u.) at DLPNO-CCSD(T)/def2-TZVPP: -1988.307725

Number of imaginary frequencies: 01

**1 + NMN (Product - exo)**

|   |             |             |             |
|---|-------------|-------------|-------------|
| W | 0.67289700  | -0.12552400 | -0.24484800 |
| P | 0.74588900  | -2.62317800 | 0.04959500  |
| O | -0.04768300 | -0.66693400 | -3.05644000 |
| N | 1.68833400  | 0.12963600  | 1.83840300  |
| N | 2.86716100  | 0.76843300  | 1.93932000  |
| N | 2.81966800  | -0.28461500 | -0.94512200 |
| N | 3.84273800  | 0.35568300  | -0.35605900 |
| N | 1.37173000  | 2.01597600  | -0.42084100 |
| N | 2.55351200  | 2.42560400  | 0.07537500  |
| N | 0.16379100  | -0.40154300 | -1.90775400 |
| C | -1.22907200 | -0.53944700 | 0.83052700  |
| C | -1.09615900 | 0.87779900  | 0.53467000  |
| C | -2.32117700 | 1.41312400  | -0.22911300 |
| C | -2.59794300 | 0.55581000  | -1.43536400 |
| C | -2.72229300 | -0.74654400 | -1.16745400 |
| C | -2.55948600 | -1.09721100 | 0.28810000  |
| C | 3.27537900  | 0.79043900  | 3.21894900  |
| C | 2.32683600  | 0.13917100  | 3.99225600  |
| C | 1.34859100  | -0.25224600 | 3.07135800  |
| C | 4.97149400  | 0.15813600  | -1.05989900 |
| C | 4.67324500  | -0.64685600 | -2.14898000 |
| C | 3.29704300  | -0.88277600 | -2.03587500 |
| C | 2.72104300  | 3.73831100  | -0.16804700 |
| C | 1.60758600  | 4.20260200  | -0.84930300 |
| C | 0.78904200  | 3.07315200  | -0.98183200 |
| C | -0.27360000 | -3.49556200 | -1.19158600 |
| C | 0.19508400  | -3.36571400 | 1.63335100  |

|   |             |             |             |
|---|-------------|-------------|-------------|
| C | 2.38889500  | -3.42757400 | -0.13479300 |
| B | 3.54107300  | 1.42485100  | 0.71618600  |
| H | -1.08326300 | -0.84163000 | 1.87643700  |
| H | 4.55986400  | 1.98675100  | 1.05665600  |
| H | -0.80472700 | 1.53756700  | 1.36499300  |
| H | -2.23981600 | 2.47992200  | -0.47528200 |
| H | -2.64902500 | 0.97107400  | -2.44311600 |
| H | -2.88900000 | -1.50557600 | -1.93363700 |
| H | -2.68952800 | -2.17168700 | 0.48094300  |
| H | 4.21050600  | 1.27336900  | 3.49139900  |
| H | 2.33738100  | -0.02213200 | 5.06592200  |
| H | 0.41504900  | -0.78149500 | 3.24484700  |
| H | 5.90551300  | 0.61777100  | -0.74589700 |
| H | 5.34978800  | -0.99801000 | -2.92224800 |
| H | 2.62116800  | -1.42467200 | -2.69581200 |
| H | 3.62323700  | 4.24888000  | 0.15962500  |
| H | 1.41439400  | 5.21156900  | -1.20077200 |
| H | -0.18549200 | 2.96733300  | -1.45142100 |
| H | -1.33364000 | -3.30088600 | -0.98288900 |
| H | -0.05290600 | -3.08500800 | -2.18755000 |
| H | -0.08990100 | -4.57972000 | -1.17540100 |
| H | 0.83845000  | -3.01105000 | 2.45105200  |
| H | -0.84216400 | -3.07594000 | 1.84561300  |
| H | 0.25815700  | -4.46263800 | 1.58275200  |
| H | 3.10908000  | -2.94236000 | 0.54020400  |
| H | 2.75671500  | -3.30744600 | -1.16152900 |
| H | 2.33081700  | -4.50065800 | 0.10041300  |
| C | -5.05797200 | -0.66798000 | 0.63008700  |
| C | -3.65205900 | -0.30149600 | 1.06722600  |
| H | -3.56050300 | -0.52270600 | 2.14145300  |
| C | -3.51221400 | 1.19854300  | 0.75647000  |
| H | -3.34258100 | 1.80461900  | 1.65890300  |
| C | -4.84867000 | 1.59927500  | 0.16042400  |
| N | -5.66927700 | 0.47852000  | 0.13989200  |
| O | -5.17914200 | 2.68479400  | -0.24549600 |
| C | -7.00201300 | 0.49901300  | -0.41289200 |
| H | -7.58997600 | 1.30330400  | 0.04956700  |
| H | -6.96667300 | 0.67367400  | -1.49807800 |
| H | -7.46403000 | -0.47506600 | -0.21155500 |
| O | -5.57668600 | -1.75544400 | 0.67895000  |

Electronic energy (a.u.) at  $\omega$ B97xd/def2-SVP: -1989.998050

Gibbs free energy correction (a.u.) at  $\omega$ B97X-D/def2-SVP: 0.471110

Electronic energy (a.u.) at  $\omega$ B97X-D/def2-TZVPP: -1989.99804967

Electronic energy (a.u.) at DLPNO-CCSD(T)/def2-TZVPP: -1988.36969

Number of imaginary frequencies: 0

**1 + NMN (Product - endo)**

|   |             |             |             |
|---|-------------|-------------|-------------|
| W | -0.59661800 | 0.30806800  | -0.35422400 |
| P | -0.65119500 | 2.47917000  | 0.91798700  |
| O | -1.01527200 | 1.92071400  | -2.79340800 |
| N | -0.69294400 | -0.84667100 | 1.67172400  |
| N | -1.70842300 | -1.69448600 | 1.91290900  |
| N | -2.84819400 | 0.28685800  | -0.14730600 |
| N | -3.52642900 | -0.70060700 | 0.45961700  |
| N | -1.20964700 | -1.73189900 | -1.10391200 |
| N | -2.08426100 | -2.50514600 | -0.43509500 |
| N | -0.77356100 | 1.23553200  | -1.84050300 |
| C | 1.53652800  | 0.68230100  | 0.09630100  |
| C | 1.38128100  | -0.55282300 | -0.65527300 |
| C | 2.27071500  | -0.56561400 | -1.91084700 |
| C | 2.03157700  | 0.68109700  | -2.72218100 |
| C | 2.17539900  | 1.81819400  | -2.03748700 |
| C | 2.54247500  | 1.62656600  | -0.58880200 |
| C | -1.56692700 | -2.25542300 | 3.12536900  |
| C | -0.41176000 | -1.75574800 | 3.70650000  |
| C | 0.09997300  | -0.87660600 | 2.74540200  |
| C | -4.84880800 | -0.49047400 | 0.33418100  |
| C | -5.04013300 | 0.68318600  | -0.37930600 |
| C | -3.74278900 | 1.12334600  | -0.67175000 |
| C | -2.26671200 | -3.66392100 | -1.09414000 |
| C | -1.48300500 | -3.64562300 | -2.23649200 |
| C | -0.83735000 | -2.40304400 | -2.19128600 |
| C | -0.21852000 | 3.90808500  | -0.13726400 |
| C | 0.42921100  | 2.69380800  | 2.38465800  |
| C | -2.27129900 | 2.98028900  | 1.62879400  |
| B | -2.78215300 | -1.99724200 | 0.84663400  |
| H | 1.75737100  | 0.59225300  | 1.16585700  |
| H | -3.56102900 | -2.82558600 | 1.26721700  |
| H | 1.43545400  | -1.49773600 | -0.09555100 |
| H | 2.15950500  | -1.49045300 | -2.49219500 |
| H | 1.71162300  | 0.64247000  | -3.76484900 |
| H | 1.98552900  | 2.80500800  | -2.46338600 |
| H | 2.66747400  | 2.57417400  | -0.04617300 |
| H | -2.29545800 | -2.97619500 | 3.48818500  |
| H | 0.00368100  | -1.99626200 | 4.68038900  |
| H | 1.00584600  | -0.27600800 | 2.78066700  |
| H | -5.56202500 | -1.19971700 | 0.74711300  |
| H | -5.98165800 | 1.14450600  | -0.66157700 |
| H | -3.40632000 | 1.97941900  | -1.25461800 |
| H | -2.94301800 | -4.41991700 | -0.70293100 |
| H | -1.38915800 | -4.41938400 | -2.99229700 |

|   |             |             |             |
|---|-------------|-------------|-------------|
| H | -0.12589000 | -1.95882700 | -2.88254000 |
| H | 0.84730400  | 3.85272300  | -0.39329400 |
| H | -0.78746500 | 3.84345200  | -1.07608900 |
| H | -0.42444200 | 4.86182100  | 0.37017400  |
| H | 0.13851900  | 1.97019400  | 3.15970200  |
| H | 1.48301400  | 2.52516100  | 2.12528600  |
| H | 0.31753600  | 3.70963900  | 2.79142700  |
| H | -2.66720000 | 2.16050200  | 2.24593600  |
| H | -2.99319600 | 3.17644200  | 0.82604200  |
| H | -2.16778000 | 3.88598700  | 2.24461800  |
| C | 4.08786100  | -1.56249700 | -0.41379200 |
| C | 3.74072300  | -0.45417200 | -1.38915100 |
| H | 4.43835400  | -0.51119900 | -2.23719800 |
| C | 3.89338500  | 0.84683600  | -0.58018200 |
| H | 4.69971900  | 1.49016300  | -0.96223100 |
| C | 4.26466400  | 0.39856200  | 0.82175200  |
| N | 4.37449100  | -0.98381400 | 0.81883000  |
| O | 4.41464200  | 1.09424800  | 1.79762600  |
| C | 4.65567800  | -1.76550100 | 1.99821400  |
| H | 5.02059300  | -1.08527100 | 2.77732400  |
| H | 3.74559300  | -2.27421100 | 2.35129300  |
| H | 5.41152300  | -2.52804000 | 1.76893400  |
| O | 4.10740900  | -2.74955700 | -0.61782000 |

Electronic energy (a.u.) at  $\omega$ B97xd/def2-SVP: -1990.000837

Gibbs free energy correction (a.u.) at  $\omega$ B97X-D/def2-SVP: 0.470851

Electronic energy (a.u.) at  $\omega$ B97X-D/def2-TZVPP: -1990.00083665

Electronic energy (a.u.) at DLPNO-CCSD(T)/def2-TZVPP: -1988.37176

Number of imaginary frequencies: 0

### 2 + NMN (reactants - exo)

|    |          |          |          |
|----|----------|----------|----------|
| Re | 0.05467  | 0.75126  | 0.14064  |
| C  | -0.23039 | -1.43496 | 0.27720  |
| C  | -0.30543 | -1.03288 | -1.11920 |
| C  | -1.57433 | -1.21229 | -1.80225 |
| C  | -2.70186 | -1.59288 | -1.13880 |
| C  | -2.63253 | -1.96515 | 0.24474  |
| C  | -1.43725 | -1.95373 | 0.89758  |
| N  | 0.12567  | 1.69394  | -1.82217 |
| C  | -0.78129 | 1.81544  | -2.78835 |
| C  | -0.26722 | 2.59022  | -3.83850 |
| C  | 1.00648  | 2.93302  | -3.41948 |
| N  | 1.21749  | 2.38119  | -2.20829 |
| N  | 2.28076  | 0.33726  | -0.20411 |
| C  | 3.09056  | -0.69614 | 0.03029  |
| C  | 4.38227  | -0.42240 | -0.44198 |

|   |          |          |          |
|---|----------|----------|----------|
| C | 4.28159  | 0.85128  | -0.97933 |
| N | 3.01562  | 1.27628  | -0.82089 |
| N | 0.78453  | 2.74102  | 0.68728  |
| C | 0.43872  | 3.56940  | 1.67187  |
| C | 1.26176  | 4.70424  | 1.65453  |
| C | 2.11240  | 4.49345  | 0.57977  |
| N | 1.80618  | 3.30747  | 0.02451  |
| B | 2.38742  | 2.62458  | -1.23682 |
| N | 0.33293  | 0.42398  | 2.27739  |
| C | -0.63897 | 0.22019  | 3.22595  |
| C | -0.05370 | 0.17490  | 4.46143  |
| N | 1.29393  | 0.35622  | 4.25563  |
| C | 1.47934  | 0.50310  | 2.92603  |
| C | 2.32172  | 0.39474  | 5.27319  |
| C | -1.73946 | 1.17190  | 0.37554  |
| O | -2.86672 | 1.44414  | 0.53483  |
| H | 0.69981  | -1.87270 | 0.65770  |
| H | 0.58778  | -1.14395 | -1.74523 |
| H | -1.61215 | -1.05684 | -2.88368 |
| H | -3.64678 | -1.69172 | -1.67751 |
| H | -3.52772 | -2.33418 | 0.75043  |
| H | -1.37102 | -2.35914 | 1.91101  |
| H | -1.75573 | 1.34743  | -2.67351 |
| H | -0.75973 | 2.86562  | -4.76622 |
| H | 1.77730  | 3.53728  | -3.89122 |
| H | 2.71269  | -1.58973 | 0.52228  |
| H | 5.25859  | -1.06274 | -0.40437 |
| H | 5.02050  | 1.48399  | -1.46484 |
| H | -0.38651 | 3.30933  | 2.33159  |
| H | 1.22816  | 5.56395  | 2.31715  |
| H | 2.90716  | 5.10831  | 0.16462  |
| H | 3.22914  | 3.33193  | -1.74981 |
| H | -1.68495 | 0.12465  | 2.94706  |
| H | -0.47338 | 0.03301  | 5.45324  |
| H | 2.45009  | 0.67586  | 2.46604  |
| H | 3.29530  | 0.55093  | 4.79322  |
| H | 2.34996  | -0.55294 | 5.82865  |
| H | 2.13856  | 1.22018  | 5.97506  |
| C | -2.26504 | -4.46455 | -2.36116 |
| C | -0.83806 | -4.29193 | -1.92984 |
| C | -0.73563 | -4.63802 | -0.64541 |
| C | -2.08888 | -5.05687 | -0.15039 |
| H | -0.06941 | -3.93142 | -2.61016 |
| H | 0.13997  | -4.63565 | 0.00006  |
| N | -2.94848 | -4.91976 | -1.23545 |
| C | -4.36828 | -5.14956 | -1.18007 |

|   |          |          |          |
|---|----------|----------|----------|
| H | -4.57712 | -6.08702 | -0.64744 |
| H | -4.88311 | -4.32664 | -0.65989 |
| H | -4.74253 | -5.21149 | -2.20972 |
| O | -2.40142 | -5.45547 | 0.94225  |
| O | -2.74863 | -4.28137 | -3.44816 |

Electronic energy (a.u.) at  $\omega$ B97xd/def2-SVP: -1788.9469493

Gibbs free energy correction (a.u.) at  $\omega$ B97X-D/def2-SVP: 0.445979

Electronic energy (a.u.) at  $\omega$ B97X-D/def2-TZVPP: -1790.8162856

Electronic energy (a.u.) at DLPNO-CCSD(T)/def2-TZVPP: -1787.548257

Number of imaginary frequencies: 0

**2 + NMN (reactants - endo)**

|    |          |          |          |
|----|----------|----------|----------|
| Re | 0.31335  | 0.03508  | -0.73915 |
| C  | -1.56106 | 0.87498  | 0.06008  |
| C  | -1.62028 | -0.57762 | 0.14104  |
| C  | -2.63439 | -1.25735 | -0.64386 |
| C  | -3.41757 | -0.59028 | -1.53639 |
| C  | -3.33297 | 0.83931  | -1.64710 |
| C  | -2.48568 | 1.53814  | -0.84412 |
| N  | 0.63393  | -2.11839 | -0.67152 |
| C  | 0.00281  | -3.13605 | -1.25208 |
| C  | 0.65088  | -4.34228 | -0.94840 |
| C  | 1.72152  | -3.96577 | -0.15608 |
| N  | 1.68696  | -2.62742 | -0.00423 |
| N  | 1.07321  | -0.00560 | 1.42644  |
| C  | 0.69486  | 0.57392  | 2.56792  |
| C  | 1.48426  | 0.11155  | 3.63162  |
| C  | 2.35727  | -0.78868 | 3.04202  |
| N  | 2.08666  | -0.83587 | 1.72542  |
| N  | 2.44517  | -0.04980 | -1.22187 |
| C  | 3.16874  | 0.58298  | -2.14444 |
| C  | 4.52426  | 0.25688  | -1.99686 |
| C  | 4.54924  | -0.62505 | -0.92698 |
| N  | 3.29062  | -0.78415 | -0.48079 |
| B  | 2.74514  | -1.70695 | 0.63470  |
| N  | 0.71561  | 2.17385  | -0.83696 |
| C  | 0.29463  | 3.06375  | -1.79403 |
| C  | 0.84530  | 4.28931  | -1.53604 |
| N  | 1.61246  | 4.13562  | -0.40506 |
| C  | 1.50458  | 2.84572  | -0.02054 |
| C  | 2.39216  | 5.16199  | 0.25202  |
| C  | -0.25930 | -0.00928 | -2.50463 |
| O  | -0.61672 | -0.02807 | -3.61998 |
| H  | -1.30269 | 1.45739  | 0.94967  |

|   |          |          |          |
|---|----------|----------|----------|
| H | -1.35471 | -1.06542 | 1.08493  |
| H | -2.78317 | -2.32819 | -0.48229 |
| H | -4.15214 | -1.13268 | -2.13616 |
| H | -3.99327 | 1.36380  | -2.34165 |
| H | -2.49443 | 2.63211  | -0.86166 |
| H | -0.87689 | -2.94576 | -1.86177 |
| H | 0.37869  | -5.34373 | -1.26787 |
| H | 2.51171  | -4.55216 | 0.30603  |
| H | -0.14158 | 1.27029  | 2.59947  |
| H | 1.41668  | 0.39035  | 4.67901  |
| H | 3.14976  | -1.40120 | 3.46509  |
| H | 2.67587  | 1.22971  | -2.86730 |
| H | 5.36275  | 0.59915  | -2.59609 |
| H | 5.37238  | -1.15840 | -0.45793 |
| H | 3.64531  | -2.36295 | 1.11626  |
| H | -0.37079 | 2.75298  | -2.59516 |
| H | 0.76053  | 5.24142  | -2.05201 |
| H | 2.01177  | 2.42784  | 0.84647  |
| H | 2.89516  | 4.72627  | 1.12361  |
| H | 1.74311  | 5.98061  | 0.59265  |
| H | 3.15398  | 5.56346  | -0.43057 |
| C | -3.20188 | 0.71189  | 2.83461  |
| C | -4.30553 | 0.93893  | 1.84425  |
| C | -4.83120 | -0.24247 | 1.51711  |
| C | -4.11497 | -1.31370 | 2.28607  |
| H | -4.55924 | 1.93011  | 1.47564  |
| H | -5.62901 | -0.47178 | 0.81457  |
| N | -3.16730 | -0.65370 | 3.07063  |
| C | -2.19850 | -1.31591 | 3.90718  |
| H | -2.51318 | -2.36082 | 4.02012  |
| H | -1.19514 | -1.28656 | 3.45462  |
| H | -2.15339 | -0.83094 | 4.89176  |
| O | -4.29380 | -2.50278 | 2.26365  |
| O | -2.46696 | 1.52689  | 3.33910  |

Electronic energy (a.u.) at  $\omega$ B97xd/def2-SVP: -1788.9535865

Gibbs free energy correction (a.u.) at  $\omega$ B97X-D/def2-SVP: 0.447891

Electronic energy (a.u.) at  $\omega$ B97X-D/def2-TZVPP: -1790.8220136

Electronic energy (a.u.) at DLPNO-CCSD(T)/def2-TZVPP: -1787.548257

Number of imaginary frequencies: 0

**2 + NMN (Transition state - exo)**



|    |          |          |          |
|----|----------|----------|----------|
| Re | -0.05722 | 0.99541  | -0.44944 |
| C  | -0.26114 | -1.17135 | -0.31055 |
| C  | -0.34891 | -0.76828 | -1.70516 |
| C  | -1.60444 | -1.13148 | -2.36961 |
| C  | -2.80521 | -1.18405 | -1.63333 |
| C  | -2.72501 | -1.55243 | -0.30552 |
| C  | -1.44888 | -1.85703 | 0.21026  |
| N  | 0.01107  | 1.93762  | -2.41222 |
| C  | -0.87270 | 1.99281  | -3.40564 |
| C  | -0.36482 | 2.76406  | -4.46057 |
| C  | 0.88100  | 3.17301  | -4.01676 |
| N  | 1.08222  | 2.66156  | -2.78688 |
| N  | 2.18380  | 0.65305  | -0.77542 |
| C  | 3.02568  | -0.35013 | -0.52309 |
| C  | 4.31616  | -0.02926 | -0.96739 |
| C  | 4.18091  | 1.24004  | -1.50730 |
| N  | 2.89730  | 1.61917  | -1.37668 |
| N  | 0.60918  | 3.01740  | 0.10100  |
| C  | 0.21969  | 3.83916  | 1.07475  |
| C  | 1.00105  | 5.00275  | 1.06034  |
| C  | 1.87303  | 4.81589  | -0.00208 |
| N  | 1.61801  | 3.61594  | -0.55229 |
| B  | 2.23376  | 2.94674  | -1.80414 |
| N  | 0.23207  | 0.68484  | 1.68858  |
| C  | -0.72079 | 0.37705  | 2.62792  |
| C  | -0.13502 | 0.34880  | 3.86341  |
| N  | 1.19318  | 0.64638  | 3.66639  |
| C  | 1.36752  | 0.84162  | 2.34201  |
| C  | 2.21359  | 0.74247  | 4.68814  |
| C  | -1.85143 | 1.41212  | -0.20477 |
| O  | -2.96450 | 1.72390  | -0.02348 |
| H  | 0.67678  | -1.61146 | 0.04904  |
| H  | 0.54217  | -0.88626 | -2.33399 |
| H  | -1.66564 | -1.01244 | -3.45473 |
| H  | -3.76862 | -1.12357 | -2.14317 |
| H  | -3.62330 | -1.79100 | 0.26729  |
| H  | -1.38622 | -2.30875 | 1.20430  |
| H  | -1.82715 | 1.48173  | -3.30726 |
| H  | -0.84276 | 2.99382  | -5.40807 |
| H  | 1.63813  | 3.79740  | -4.48436 |
| H  | 2.67091  | -1.25736 | -0.03913 |
| H  | 5.21373  | -0.63801 | -0.91161 |
| H  | 4.90675  | 1.89890  | -1.97752 |
| H  | -0.60514 | 3.55422  | 1.72475  |
| H  | 0.92751  | 5.86506  | 1.71628  |
| H  | 2.64983  | 5.45703  | -0.41151 |

|   |          |          |          |
|---|----------|----------|----------|
| H | 3.05825  | 3.67743  | -2.31155 |
| H | -1.75552 | 0.20458  | 2.34476  |
| H | -0.54261 | 0.14691  | 4.84982  |
| H | 2.32172  | 1.10252  | 1.88906  |
| H | 3.17239  | 0.98590  | 4.21490  |
| H | 2.31538  | -0.21282 | 5.22129  |
| H | 1.96444  | 1.53431  | 5.40807  |
| C | -2.48546 | -3.80421 | -2.85785 |
| C | -1.18891 | -3.30439 | -2.32532 |
| C | -1.10691 | -3.67422 | -0.98010 |
| C | -2.34910 | -4.41839 | -0.63442 |
| H | -0.34548 | -3.17372 | -2.99989 |
| H | -0.18755 | -3.88609 | -0.43815 |
| N | -3.15705 | -4.36829 | -1.76947 |
| C | -4.49471 | -4.89508 | -1.82831 |
| H | -4.53653 | -5.86506 | -1.31444 |
| H | -5.21373 | -4.21392 | -1.34664 |
| H | -4.76563 | -5.01385 | -2.88520 |
| O | -2.65530 | -4.96061 | 0.40146  |
| O | -2.92349 | -3.75038 | -3.98234 |

Electronic energy (a.u.) at  $\omega$ B97xd/def2-SVP: -1788.9186223

Gibbs free energy correction (a.u.) at  $\omega$ B97X-D/def2-SVP : 0.451132

Electronic energy (a.u.) at  $\omega$ B97X-D/def2-TZVPP: -1790.7843588

Electronic energy (a.u.) at DLPNO-CCSD(T)/def2-TZVPP: -1787.516145

Number of imaginary frequencies: 1

### 2 + NMN (Transition state - endo)

|    |          |          |          |
|----|----------|----------|----------|
| Re | 0.69115  | -0.06714 | -0.40776 |
| C  | -1.10461 | 0.68183  | 0.56661  |
| C  | -1.16068 | -0.77325 | 0.51444  |
| C  | -2.31352 | -1.31262 | -0.20594 |
| C  | -2.86641 | -0.59573 | -1.29150 |
| C  | -2.80819 | 0.77983  | -1.24478 |
| C  | -2.20187 | 1.36809  | -0.11295 |
| N  | 1.04311  | -2.21508 | -0.47428 |
| C  | 0.37332  | -3.21106 | -1.04865 |
| C  | 1.03441  | -4.42745 | -0.82772 |
| C  | 2.15193  | -4.07995 | -0.08824 |
| N  | 2.13116  | -2.74796 | 0.11112  |
| N  | 1.57662  | -0.20014 | 1.70322  |
| C  | 1.28360  | 0.35259  | 2.88176  |
| C  | 2.13677  | -0.14250 | 3.87820  |
| C  | 2.96015  | -1.03273 | 3.20694  |
| N  | 2.60168  | -1.04296 | 1.91102  |
| N  | 2.80442  | -0.09857 | -1.00048 |

|   |          |          |          |
|---|----------|----------|----------|
| C | 3.47398  | 0.58875  | -1.92477 |
| C | 4.83714  | 0.26802  | -1.86584 |
| C | 4.92405  | -0.66939 | -0.84723 |
| N | 3.69226  | -0.86362 | -0.34462 |
| B | 3.21160  | -1.85201 | 0.74521  |
| N | 1.06469  | 2.08033  | -0.40045 |
| C | 0.50410  | 3.03005  | -1.21788 |
| C | 1.04599  | 4.24988  | -0.91974 |
| N | 1.95035  | 4.03168  | 0.09296  |
| C | 1.92793  | 2.71126  | 0.37222  |
| C | 2.76824  | 5.03129  | 0.74574  |
| C | 0.07463  | -0.01159 | -2.15869 |
| O | -0.26882 | 0.03823  | -3.27704 |
| H | -0.81474 | 1.17362  | 1.49923  |
| H | -0.87988 | -1.34604 | 1.40592  |
| H | -2.49381 | -2.38839 | -0.13129 |
| H | -3.47405 | -1.10774 | -2.04081 |
| H | -3.36973 | 1.39046  | -1.95522 |
| H | -2.28189 | 2.44879  | 0.03326  |
| H | -0.54339 | -2.99980 | -1.59335 |
| H | 0.73940  | -5.41711 | -1.16301 |
| H | 2.96491  | -4.68358 | 0.30725  |
| H | 0.47442  | 1.07481  | 2.97063  |
| H | 2.14547  | 0.10801  | 4.93486  |
| H | 3.77450  | -1.66048 | 3.56022  |
| H | 2.93919  | 1.26784  | -2.58561 |
| H | 5.64080  | 0.64928  | -2.48876 |
| H | 5.77442  | -1.21943 | -0.45175 |
| H | 4.14023  | -2.52115 | 1.14673  |
| H | -0.24370 | 2.76262  | -1.95939 |
| H | 0.86933  | 5.23832  | -1.33401 |
| H | 2.54869  | 2.24256  | 1.13282  |
| H | 3.39772  | 4.54247  | 1.49891  |
| H | 2.13693  | 5.77928  | 1.24504  |
| H | 3.41759  | 5.53342  | 0.01540  |
| C | -3.10704 | 1.05574  | 2.58550  |
| C | -3.79338 | 0.73830  | 1.30062  |
| C | -3.89180 | -0.65554 | 1.20572  |
| C | -3.30282 | -1.23760 | 2.44280  |
| H | -4.50862 | 1.45068  | 0.89606  |
| H | -4.68574 | -1.19777 | 0.69745  |
| N | -2.80155 | -0.16614 | 3.18242  |
| C | -2.02605 | -0.32147 | 4.38374  |
| H | -2.56531 | -0.94528 | 5.11030  |
| H | -1.05590 | -0.79758 | 4.17050  |
| H | -1.86040 | 0.67854  | 4.80510  |

|   |          |          |         |
|---|----------|----------|---------|
| O | -3.22200 | -2.39295 | 2.78401 |
| O | -2.81708 | 2.13510  | 3.04930 |

Electronic energy (a.u.) at  $\omega$ B97xd/def2-SVP: -1788.9200786

Gibbs free energy correction (a.u.) at  $\omega$ B97X-D/def2-SVP: 0.452815

Electronic energy (a.u.) at  $\omega$ B97X-D/def2-TZVPP: -1790.785063

Electronic energy (a.u.) at DLPNO-CCSD(T)/def2-TZVPP: -1787.516363

Number of imaginary frequencies: 1

**2 + NMN (Product - exo)**

|    |          |          |          |
|----|----------|----------|----------|
| Re | 0.08314  | 0.63133  | 0.11835  |
| C  | -0.11016 | -1.51493 | 0.25738  |
| C  | -0.19383 | -1.11479 | -1.12436 |
| C  | -1.46617 | -1.66453 | -1.79593 |
| C  | -2.68759 | -1.32690 | -0.98618 |
| C  | -2.61419 | -1.69090 | 0.29722  |
| C  | -1.32445 | -2.36466 | 0.67778  |
| N  | 0.16572  | 1.57216  | -1.84574 |
| C  | -0.69963 | 1.59407  | -2.85619 |
| C  | -0.18372 | 2.35211  | -3.91677 |
| C  | 1.04859  | 2.78612  | -3.45914 |
| N  | 1.23391  | 2.30188  | -2.21581 |
| N  | 2.32766  | 0.30024  | -0.20233 |
| C  | 3.17083  | -0.69808 | 0.06159  |
| C  | 4.46602  | -0.36966 | -0.36404 |
| C  | 4.33155  | 0.89891  | -0.90566 |
| N  | 3.04399  | 1.27114  | -0.79302 |
| N  | 0.75075  | 2.67295  | 0.66650  |
| C  | 0.35123  | 3.49965  | 1.63160  |
| C  | 1.12695  | 4.66725  | 1.61367  |
| C  | 2.00587  | 4.47731  | 0.55744  |
| N  | 1.75984  | 3.27191  | 0.01507  |
| B  | 2.38078  | 2.59600  | -1.22989 |
| N  | 0.39449  | 0.33290  | 2.25544  |
| C  | -0.53006 | -0.05221 | 3.19388  |
| C  | 0.06556  | -0.07074 | 4.42467  |
| N  | 1.37173  | 0.31162  | 4.22534  |
| C  | 1.52315  | 0.54466  | 2.90406  |
| C  | 2.39286  | 0.44750  | 5.24150  |
| C  | -1.69448 | 1.10194  | 0.38448  |
| O  | -2.77550 | 1.50074  | 0.59686  |
| H  | 0.82010  | -1.97079 | 0.62413  |
| H  | 0.69210  | -1.24254 | -1.76219 |
| H  | -1.55590 | -1.36745 | -2.84887 |
| H  | -3.54298 | -0.80261 | -1.41603 |

|   |          |          |          |
|---|----------|----------|----------|
| H | -3.40458 | -1.49637 | 1.02449  |
| H | -1.29408 | -2.65828 | 1.73561  |
| H | -1.64691 | 1.06909  | -2.76594 |
| H | -0.64729 | 2.55628  | -4.87716 |
| H | 1.80673  | 3.40982  | -3.92599 |
| H | 2.81148  | -1.60707 | 0.53855  |
| H | 5.36614  | -0.97347 | -0.29618 |
| H | 5.06013  | 1.56171  | -1.36607 |
| H | -0.47744 | 3.21587  | 2.27732  |
| H | 1.04523  | 5.53395  | 2.26288  |
| H | 2.78153  | 5.11952  | 0.14743  |
| H | 3.20637  | 3.32462  | -1.73897 |
| H | -1.55415 | -0.28126 | 2.91351  |
| H | -0.32113 | -0.31869 | 5.40896  |
| H | 2.45676  | 0.87018  | 2.45008  |
| H | 3.33120  | 0.75839  | 4.76670  |
| H | 2.55685  | -0.51097 | 5.75311  |
| H | 2.10285  | 1.20735  | 5.98040  |
| C | -2.48077 | -3.97359 | -2.26172 |
| C | -1.29081 | -3.21541 | -1.70433 |
| C | -1.20698 | -3.63419 | -0.22569 |
| C | -2.35465 | -4.60560 | -0.02696 |
| H | -0.39921 | -3.50710 | -2.27925 |
| H | -0.26925 | -4.15817 | 0.01333  |
| N | -3.01738 | -4.74739 | -1.23777 |
| C | -4.19523 | -5.56605 | -1.39140 |
| H | -4.00161 | -6.58013 | -1.01630 |
| H | -5.03780 | -5.14109 | -0.82644 |
| H | -4.44621 | -5.59551 | -2.45869 |
| O | -2.67524 | -5.17051 | 0.98922  |
| O | -2.91668 | -3.93145 | -3.38465 |

Electronic energy (a.u.) at  $\omega$ B97xd/def2-SVP: -1788.9871695

Gibbs free energy correction (a.u.) at  $\omega$ B97X-D/def2-SVP: 0.456956

Electronic energy (a.u.) at  $\omega$ B97X-D/def2-TZVPP: -1790.8486142

Electronic energy (a.u.) at DLPNO-CCSD(T)/def2-TZVPP: -1787.575836

Number of imaginary frequencies: 0

### 2 + NMN (Product - endo)

|    |          |          |          |
|----|----------|----------|----------|
| Re | 0.28581  | -0.04782 | -0.65188 |
| C  | -1.45773 | 0.67900  | 0.38297  |
| C  | -1.49172 | -0.76148 | 0.34751  |
| C  | -2.82402 | -1.27977 | -0.22361 |
| C  | -3.12804 | -0.62394 | -1.54375 |
| C  | -3.09601 | 0.71096  | -1.51411 |

|   |          |          |          |
|---|----------|----------|----------|
| C | -2.75602 | 1.29389  | -0.16880 |
| N | 0.65982  | -2.19225 | -0.74707 |
| C | -0.04462 | -3.19345 | -1.26808 |
| C | 0.63063  | -4.40750 | -1.08007 |
| C | 1.79200  | -4.05318 | -0.41499 |
| N | 1.78253  | -2.71953 | -0.22631 |
| N | 1.26623  | -0.21140 | 1.41735  |
| C | 1.00564  | 0.30494  | 2.61926  |
| C | 1.91320  | -0.18609 | 3.56866  |
| C | 2.73209  | -1.03807 | 2.84454  |
| N | 2.32128  | -1.02998 | 1.56397  |
| N | 2.38898  | -0.06188 | -1.34446 |
| C | 3.00745  | 0.63421  | -2.29690 |
| C | 4.37447  | 0.32329  | -2.30619 |
| C | 4.51747  | -0.61852 | -1.29794 |
| N | 3.31267  | -0.82297 | -0.73706 |
| B | 2.88702  | -1.82179 | 0.36422  |
| N | 0.67333  | 2.09759  | -0.62698 |
| C | 0.05403  | 3.07074  | -1.37026 |
| C | 0.61278  | 4.28262  | -1.07150 |
| N | 1.58749  | 4.03535  | -0.13334 |
| C | 1.58759  | 2.70613  | 0.10291  |
| C | 2.44902  | 5.01607  | 0.49098  |
| C | -0.35050 | 0.02632  | -2.39450 |
| O | -0.65347 | 0.08926  | -3.52533 |
| H | -1.15281 | 1.19321  | 1.30272  |
| H | -1.18029 | -1.32478 | 1.23779  |
| H | -2.86251 | -2.37633 | -0.26268 |
| H | -3.31227 | -1.20240 | -2.45098 |
| H | -3.25290 | 1.33650  | -2.39492 |
| H | -2.72949 | 2.39183  | -0.16626 |
| H | -0.99547 | -2.98721 | -1.75221 |
| H | 0.31589  | -5.40008 | -1.38756 |
| H | 2.62812  | -4.65311 | -0.06480 |
| H | 0.17777  | 0.99790  | 2.75401  |
| H | 1.95904  | 0.04086  | 4.62969  |
| H | 3.57550  | -1.65213 | 3.15052  |
| H | 2.43593  | 1.31113  | -2.92872 |
| H | 5.14410  | 0.71307  | -2.96578 |
| H | 5.38960  | -1.16499 | -0.94739 |
| H | 3.83603  | -2.48910 | 0.71888  |
| H | -0.74241 | 2.82455  | -2.06665 |
| H | 0.40388  | 5.28336  | -1.43842 |
| H | 2.26044  | 2.21521  | 0.80281  |
| H | 3.12676  | 4.50607  | 1.18601  |
| H | 1.85400  | 5.74947  | 1.05263  |

|   |          |          |          |
|---|----------|----------|----------|
| H | 3.04893  | 5.53913  | -0.26653 |
| C | -3.55598 | 1.12729  | 2.25231  |
| C | -3.86899 | 0.78604  | 0.80599  |
| C | -3.92045 | -0.75303 | 0.76174  |
| C | -3.66676 | -1.19483 | 2.19042  |
| H | -4.83258 | 1.24887  | 0.54649  |
| H | -4.90473 | -1.13563 | 0.45504  |
| N | -3.46684 | -0.05954 | 2.96727  |
| C | -3.11667 | -0.12593 | 4.36457  |
| H | -3.80530 | -0.79903 | 4.89235  |
| H | -2.09291 | -0.51116 | 4.48813  |
| H | -3.18044 | 0.88825  | 4.77745  |
| O | -3.62387 | -2.31920 | 2.62175  |
| O | -3.38957 | 2.22340  | 2.72952  |

Electronic energy (a.u.) at  $\omega$ B97xd/def2-SVP: -1788.9890515

Gibbs free energy correction (a.u.) at  $\omega$ B97X-D/def2-SVP: 0.456631

Electronic energy (a.u.) at  $\omega$ B97X-D/def2-TZVPP: -1790.8497391

Electronic energy (a.u.) at DLPNO-CCSD(T)/def2-TZVPP: -1787.577057

Number of imaginary frequencies: 0

### 3 + NMN (reactants - endo)

|    |          |          |          |
|----|----------|----------|----------|
| Os | -1.39933 | -0.58486 | 0.11246  |
| N  | -1.84104 | 1.56298  | -0.02566 |
| H  | -2.27349 | 1.97494  | 0.80620  |
| H  | -0.99373 | 2.12330  | -0.17403 |
| N  | -3.55490 | -1.04612 | 0.27330  |
| H  | -4.06960 | -0.39656 | 0.87541  |
| H  | -4.06321 | -1.01077 | -0.61489 |
| N  | -1.64661 | -0.80750 | -2.06081 |
| H  | -1.50495 | 0.05685  | -2.59230 |
| H  | -0.95066 | -1.45295 | -2.44726 |
| N  | -1.45261 | -0.49526 | 2.30681  |
| H  | -0.71543 | -1.07571 | 2.71977  |
| H  | -1.27901 | 0.43596  | 2.69737  |
| N  | -0.93457 | -2.71161 | 0.23316  |
| H  | 0.02123  | -2.87715 | -0.10503 |
| H  | -0.94350 | -3.11101 | 1.17541  |
| C  | 0.71970  | 0.07335  | 0.68079  |
| C  | 1.52839  | -0.85761 | 1.42889  |
| C  | 2.18038  | -1.88355 | 0.80222  |
| C  | 2.12930  | -2.00644 | -0.62206 |
| C  | 1.42756  | -1.09762 | -1.36769 |
| C  | 0.66685  | -0.05063 | -0.73288 |
| H  | 0.56058  | 1.04770  | 1.15360  |

|   |          |          |          |
|---|----------|----------|----------|
| H | 2.80917  | -2.56737 | 1.37645  |
| H | 2.72340  | -2.77896 | -1.11545 |
| H | 0.46216  | 0.82673  | -1.35440 |
| H | -2.46350 | 1.83120  | -0.79315 |
| H | -2.54853 | -1.16895 | -2.38365 |
| H | -3.76506 | -1.97559 | 0.65006  |
| H | -2.32045 | -0.80996 | 2.74963  |
| H | -1.52746 | -3.33580 | -0.32061 |
| C | 3.02299  | 2.23661  | 0.82290  |
| C | 4.15171  | 1.34174  | 0.39950  |
| C | 4.11297  | 1.20812  | -0.92862 |
| C | 2.95674  | 2.00774  | -1.45588 |
| H | 4.84427  | 0.90199  | 1.11568  |
| O | 2.62707  | 2.48357  | 1.93228  |
| O | 2.49585  | 2.03194  | -2.56728 |
| H | 4.76572  | 0.63073  | -1.58169 |
| N | 2.41374  | 2.66862  | -0.35460 |
| C | 1.29865  | 3.57498  | -0.41347 |
| H | 0.66699  | 3.31235  | -1.27676 |
| H | 0.74336  | 3.51914  | 0.53571  |
| H | 1.62393  | 4.61724  | -0.54716 |
| H | 1.68438  | -0.68388 | 2.49715  |
| H | 1.50377  | -1.11049 | -2.45834 |

Electronic energy (a.u.) at  $\omega$ B97xd/def2-SVP: -1003.1912797

Gibbs free energy correction (a.u.) at  $\omega$ B97X-D/def2-SVP: 0.344602

Electronic energy (a.u.) at  $\omega$ B97X-D/def2-TZVPP: -1004.224452

Electronic energy (a.u.) at DLPNO-CCSD(T)/def2-TZVPP: -1002.641361

Number of imaginary frequencies: 0

### 3 + NMN (Transition state - endo)

|    |          |          |          |
|----|----------|----------|----------|
| Os | 0.08219  | 0.39474  | -0.09964 |
| N  | -0.52830 | 2.50625  | -0.22301 |
| H  | -0.82028 | 2.92216  | 0.66620  |
| H  | 0.22900  | 3.11673  | -0.55010 |
| N  | -2.04592 | -0.23984 | 0.06826  |
| H  | -2.55306 | 0.23056  | 0.82363  |
| H  | -2.60843 | -0.03788 | -0.76335 |
| N  | -0.18722 | 0.15432  | -2.26807 |
| H  | -0.17347 | 1.03197  | -2.79613 |
| H  | 0.57888  | -0.39149 | -2.67446 |
| N  | 0.05038  | 0.44647  | 2.09564  |
| H  | 0.85255  | -0.06116 | 2.48204  |
| H  | 0.13375  | 1.38312  | 2.50225  |
| N  | 0.63347  | -1.70522 | 0.01591  |



|   |          |          |          |
|---|----------|----------|----------|
| H | 1.65834  | -1.78216 | -0.03207 |
| H | 0.36803  | -2.19212 | 0.87645  |
| C | 2.08038  | 1.26784  | 0.44386  |
| C | 3.13614  | 0.52178  | 1.12257  |
| C | 3.57207  | -0.71438 | 0.58136  |
| C | 3.52313  | -0.85975 | -0.79011 |
| C | 3.03792  | 0.23798  | -1.54604 |
| C | 2.02714  | 1.11618  | -0.96417 |
| H | 1.83793  | 2.23207  | 0.90344  |
| H | 4.11632  | -1.42892 | 1.20363  |
| H | 4.02976  | -1.69118 | -1.28632 |
| H | 1.74610  | 1.96358  | -1.59914 |
| H | -1.30609 | 2.69990  | -0.86018 |
| H | -1.04169 | -0.32231 | -2.57011 |
| H | -2.18952 | -1.23983 | 0.23967  |
| H | -0.77049 | 0.03371  | 2.54772  |
| H | 0.28144  | -2.30066 | -0.73871 |
| C | 4.26149  | 3.09457  | 0.62538  |
| C | 4.77536  | 1.72144  | 0.28704  |
| C | 4.72091  | 1.58008  | -1.09985 |
| C | 4.16742  | 2.85868  | -1.66776 |
| H | 5.51291  | 1.25445  | 0.93805  |
| O | 4.09106  | 3.57942  | 1.71216  |
| O | 3.90575  | 3.10916  | -2.81422 |
| H | 5.41067  | 0.98787  | -1.69939 |
| N | 3.91774  | 3.69444  | -0.58212 |
| C | 3.34207  | 5.01615  | -0.68727 |
| H | 3.41997  | 5.34362  | -1.73114 |
| H | 2.28262  | 5.02024  | -0.38141 |
| H | 3.88736  | 5.71095  | -0.03607 |
| H | 3.31170  | 0.73534  | 2.18073  |
| H | 3.13420  | 0.22272  | -2.63530 |

Electronic energy (a.u.) at  $\omega$ B97xd/def2-SVP: -1003.1468246

Gibbs free energy correction (a.u.) at  $\omega$ B97X-D/def2-SVP: 0.347517

Electronic energy (a.u.) at  $\omega$ B97X-D/def2-TZVPP: -1004.175393

Electronic energy (a.u.) at DLPNO-CCSD(T)/def2-TZVPP:

Number of imaginary frequencies: 1

### 3 + NMN (Product - endo)

|    |          |          |          |
|----|----------|----------|----------|
| Os | -1.34672 | -0.63707 | 0.10958  |
| N  | -2.05893 | 1.44314  | 0.01154  |
| H  | -2.31876 | 1.85057  | 0.91455  |
| H  | -1.34621 | 2.08280  | -0.35795 |
| N  | -3.46853 | -1.38218 | 0.28749  |
| H  | -3.98718 | -0.94514 | 1.05492  |

|   |          |          |          |
|---|----------|----------|----------|
| H | -4.04734 | -1.18773 | -0.53459 |
| N | -1.64790 | -0.86766 | -2.05500 |
| H | -1.68336 | 0.01848  | -2.56731 |
| H | -0.86685 | -1.37059 | -2.48579 |
| N | -1.38412 | -0.62295 | 2.30447  |
| H | -0.57660 | -1.12219 | 2.68851  |
| H | -1.31526 | 0.31057  | 2.72043  |
| N | -0.76757 | -2.73208 | 0.19984  |
| H | 0.25947  | -2.77408 | 0.19675  |
| H | -1.06411 | -3.24516 | 1.03465  |
| C | 0.53744  | 0.34719  | 0.64730  |
| C | 1.81069  | -0.24331 | 1.26837  |
| C | 2.07663  | -1.64933 | 0.79472  |
| C | 2.04339  | -1.79762 | -0.53654 |
| C | 1.73830  | -0.53177 | -1.29561 |
| C | 0.49468  | 0.18631  | -0.75054 |
| H | 0.25801  | 1.30315  | 1.10853  |
| H | 2.36383  | -2.44268 | 1.48994  |
| H | 2.30197  | -2.72536 | -1.05421 |
| H | 0.18464  | 1.01736  | -1.39785 |
| H | -2.87844 | 1.59827  | -0.58228 |
| H | -2.48663 | -1.37772 | -2.34643 |
| H | -3.57149 | -2.38989 | 0.44219  |
| H | -2.20055 | -1.05348 | 2.74803  |
| H | -1.07174 | -3.31303 | -0.58622 |
| C | 2.75804  | 2.10996  | 0.84752  |
| C | 2.94934  | 0.61580  | 0.61280  |
| C | 2.90308  | 0.44803  | -0.91168 |
| C | 2.68067  | 1.85497  | -1.45561 |
| H | 3.91364  | 0.31849  | 1.04812  |
| O | 2.60179  | 2.65360  | 1.90777  |
| O | 2.44914  | 2.14688  | -2.59820 |
| H | 3.84390  | 0.06269  | -1.32920 |
| N | 2.71495  | 2.74099  | -0.38704 |
| C | 2.57703  | 4.17838  | -0.53029 |
| H | 2.38904  | 4.39761  | -1.58790 |
| H | 1.74856  | 4.54199  | 0.09245  |
| H | 3.49857  | 4.68128  | -0.20830 |
| H | 1.84421  | -0.13027 | 2.35942  |
| H | 1.70976  | -0.66600 | -2.38422 |

Electronic energy (a.u.) at  $\omega$ B97xd/def2-SVP: -1003.2124487

Gibbs free energy correction (a.u.) at  $\omega$ B97X-D/def2-SVP: 0.353316

Electronic energy (a.u.) at  $\omega$ B97X-D/def2-TZVPP: -1004.237046

Electronic energy (a.u.) at DLPNO-CCSD(T)/def2-TZVPP: -1002.662696

Number of imaginary frequencies: 0

**Benzene + NMN (reactants)**

|   |          |          |          |
|---|----------|----------|----------|
| C | 1.60041  | 0.26362  | -0.91957 |
| C | 1.38243  | -1.07396 | -1.24939 |
| C | 0.48773  | -1.40228 | -2.26932 |
| C | -0.18453 | -0.39399 | -2.96018 |
| C | 0.02776  | 0.94269  | -2.62324 |
| C | 0.91888  | 1.27241  | -1.60085 |
| H | 2.29993  | 0.52316  | -0.12154 |
| H | 1.90173  | -1.86451 | -0.70377 |
| H | 0.31793  | -2.45005 | -2.52735 |
| H | -0.87993 | -0.65158 | -3.76236 |
| H | -0.50193 | 1.73318  | -3.15982 |
| H | 1.07658  | 2.31781  | -1.32787 |
| C | -0.83125 | 1.14543  | 1.20077  |
| C | -1.78030 | 0.47086  | 0.25142  |
| C | -1.62235 | -0.84883 | 0.35604  |
| C | -0.55846 | -1.12351 | 1.38095  |
| H | -2.44860 | 1.03713  | -0.39413 |
| H | -2.12676 | -1.64884 | -0.18212 |
| N | -0.15154 | 0.11982  | 1.85319  |
| C | 0.90216  | 0.31553  | 2.81573  |
| H | 0.64581  | -0.14992 | 3.77790  |
| H | 1.84421  | -0.12355 | 2.45533  |
| H | 1.02916  | 1.39661  | 2.95406  |
| O | -0.11863 | -2.18365 | 1.74173  |
| O | -0.66587 | 2.32357  | 1.38014  |

Electronic energy (a.u.) at  $\omega$ B97X-D/def2-SVP: -630.3392824

Gibbs free energy correction (a.u.) at  $\omega$ B97X-D/def2-SVP: 0.157753

Electronic energy (a.u.) at  $\omega$ B97X-D/def2-TZVPP: -631.0299041

Electronic energy (a.u.) at DLPNO-CCSD(T)/def2-TZVPP: -629.9308415

Number of imaginary frequencies: 0

**Benzene + NMN (Transition state)**

|   |          |          |          |
|---|----------|----------|----------|
| C | -1.18025 | 0.60954  | 0.37378  |
| C | -1.23848 | -0.75107 | 0.35304  |
| C | -2.40562 | -1.34271 | -0.23347 |
| C | -3.01654 | -0.64796 | -1.33443 |
| C | -2.95853 | 0.70997  | -1.31365 |
| C | -2.29173 | 1.31617  | -0.19308 |
| H | -0.40656 | 1.15152  | 0.92041  |
| H | -0.51472 | -1.37363 | 0.88201  |
| H | -2.51533 | -2.42832 | -0.17348 |
| H | -3.60554 | -1.19584 | -2.07242 |

|   |          |          |          |
|---|----------|----------|----------|
| H | -3.49774 | 1.32836  | -2.03375 |
| H | -2.30903 | 2.40479  | -0.09942 |
| C | -3.07265 | 1.13133  | 2.51250  |
| C | -3.75636 | 0.72699  | 1.24385  |
| C | -3.81510 | -0.67742 | 1.22183  |
| C | -3.16900 | -1.17530 | 2.47725  |
| H | -4.52629 | 1.38307  | 0.84178  |
| H | -4.63758 | -1.25336 | 0.80142  |
| N | -2.68378 | -0.05078 | 3.14088  |
| C | -1.90279 | -0.10615 | 4.35079  |
| H | -2.29218 | -0.90055 | 5.00081  |
| H | -0.84449 | -0.31763 | 4.13261  |
| H | -1.97780 | 0.86697  | 4.85207  |
| O | -3.05090 | -2.30918 | 2.86838  |
| O | -2.86270 | 2.24026  | 2.93536  |

Electronic energy (a.u.) at  $\omega$ B97X-D/def2-SVP: -630.2863335

Gibbs free energy correction (a.u.) at  $\omega$ B97X-D/def2-SVP: 0.161982

Electronic energy (a.u.) at  $\omega$ B97X-D/def2-TZVPP: -630.9730492

Electronic energy (a.u.) at DLPNO-CCSD(T)/def2-TZVPP: -629.8809221

Number of imaginary frequencies: 1

#### **Benzene + NMN (Product)**

|   |          |          |          |
|---|----------|----------|----------|
| C | 1.52132  | 0.63835  | -1.16809 |
| C | 1.47783  | -0.69544 | -1.19173 |
| C | 0.09707  | -1.26025 | -1.47245 |
| C | -0.45154 | -0.60510 | -2.72818 |
| C | -0.40820 | 0.72829  | -2.70448 |
| C | 0.18051  | 1.30143  | -1.42704 |
| H | 2.41255  | 1.22598  | -0.94287 |
| H | 2.32872  | -1.34741 | -0.98864 |
| H | 0.07845  | -2.35557 | -1.50335 |
| H | -0.86053 | -1.19793 | -3.54791 |
| H | -0.77689 | 1.37519  | -3.50214 |
| H | 0.23314  | 2.39604  | -1.41907 |
| C | -0.25396 | 1.15316  | 1.09764  |
| C | -0.77075 | 0.79696  | -0.28654 |
| C | -0.82075 | -0.73579 | -0.31385 |
| C | -0.32933 | -1.17013 | 1.05695  |
| H | -1.76024 | 1.25871  | -0.41270 |
| H | -1.83821 | -1.12684 | -0.45542 |
| N | -0.05313 | -0.02989 | 1.79837  |
| C | 0.47363  | -0.08196 | 3.14200  |
| H | -0.16526 | -0.71514 | 3.77194  |
| H | 1.48979  | -0.50214 | 3.14187  |
| H | 0.49873  | 0.94241  | 3.53263  |

|   |          |          |         |
|---|----------|----------|---------|
| O | -0.18231 | -2.29499 | 1.46036 |
| O | -0.03909 | 2.25503  | 1.53261 |

Electronic energy (a.u.) at  $\omega$ B97X-D/def2-SVP: -630.3419725

Gibbs free energy correction (a.u.) at  $\omega$ B97X-D/def2-SVP: 0.167886

Electronic energy (a.u.) at  $\omega$ B97X-D/def2-TZVPP: -631.024834

Electronic energy (a.u.) at DLPNO-CCSD(T)/def2-TZVPP: -629.9312066

Number of imaginary frequencies: 0

**7' + NMN (reactants - exo)**

|   |          |          |          |
|---|----------|----------|----------|
| W | -0.46131 | -0.51424 | 0.77062  |
| P | 1.08063  | -2.47219 | 1.07331  |
| O | 1.41370  | 1.10216  | 2.38609  |
| N | -2.27991 | 0.81886  | 0.92373  |
| N | -3.51219 | 0.30687  | 1.10267  |
| N | -1.97625 | -1.88206 | -0.34537 |
| N | -3.23321 | -1.99806 | 0.11498  |
| N | -1.54285 | -1.25221 | 2.58698  |
| N | -2.85000 | -1.56573 | 2.57657  |
| N | 0.64861  | 0.47273  | 1.72254  |
| C | 2.14093  | -0.04590 | -1.11227 |
| H | 2.91680  | -0.79536 | -1.29953 |
| C | 0.75565  | -0.44106 | -1.16153 |
| H | 0.54663  | -1.31811 | -1.78390 |
| C | -0.24738 | 0.63318  | -1.13816 |
| C | 0.22482  | 1.99035  | -1.07723 |
| C | 3.92215  | 1.60256  | -0.64836 |
| H | 4.67223  | 0.80852  | -0.67951 |
| C | 1.99075  | 3.66053  | -0.62200 |
| H | 1.24524  | 4.45908  | -0.63097 |
| C | 2.53657  | 1.24307  | -0.82896 |
| C | 1.54186  | 2.30415  | -0.81569 |
| C | 4.28967  | 2.89373  | -0.44248 |
| C | 3.30532  | 3.94364  | -0.42885 |
| C | -4.40606 | 1.30483  | 1.24075  |
| H | -5.45845 | 1.08397  | 1.40117  |
| C | -3.73215 | 2.51093  | 1.14980  |
| H | -4.14646 | 3.51223  | 1.21860  |
| C | -2.39256 | 2.14452  | 0.95652  |
| H | -1.50567 | 2.76449  | 0.85066  |
| C | -3.94008 | -2.83057 | -0.66724 |
| H | -4.98352 | -3.04211 | -0.44733 |
| C | -3.11362 | -3.28079 | -1.68548 |
| H | -3.36126 | -3.96197 | -2.49392 |
| C | -1.89028 | -2.64937 | -1.43409 |
| H | -0.96018 | -2.70899 | -1.99412 |

|   |          |          |          |
|---|----------|----------|----------|
| C | -3.25206 | -1.88913 | 3.81893  |
| H | -4.28841 | -2.15561 | 4.01126  |
| C | -2.16510 | -1.78490 | 4.67299  |
| H | -2.13836 | -1.97035 | 5.74249  |
| C | -1.11620 | -1.36571 | 3.84469  |
| H | -0.08438 | -1.12217 | 4.09107  |
| C | 2.69406  | -1.97487 | 1.77244  |
| H | 3.35445  | -2.83892 | 1.93617  |
| H | 2.52479  | -1.44375 | 2.71962  |
| H | 3.17030  | -1.25909 | 1.08812  |
| C | 1.55624  | -3.51382 | -0.36431 |
| H | 2.05139  | -2.90930 | -1.13486 |
| H | 0.65546  | -3.97170 | -0.79757 |
| H | 2.24063  | -4.31466 | -0.04775 |
| C | 0.50566  | -3.78402 | 2.22607  |
| H | -0.48556 | -4.13525 | 1.90293  |
| H | 0.40411  | -3.38322 | 3.24220  |
| H | 1.20657  | -4.63165 | 2.24336  |
| B | -3.71573 | -1.20418 | 1.34595  |
| H | -4.88283 | -1.44956 | 1.56326  |
| H | -1.18262 | 0.47288  | -1.68779 |
| H | 5.34184  | 3.14702  | -0.29400 |
| H | 3.62680  | 4.97518  | -0.26888 |
| C | 3.21605  | 1.29454  | -3.94329 |
| C | 1.83507  | 0.71924  | -4.03739 |
| C | 0.95172  | 1.72238  | -4.02636 |
| C | 1.70162  | 3.01708  | -3.92896 |
| H | 1.65980  | -0.35145 | -4.11274 |
| O | 4.27168  | 0.71296  | -3.93284 |
| O | 1.26337  | 4.13886  | -3.90896 |
| H | -0.13352 | 1.68596  | -4.08850 |
| N | 3.04966  | 2.67397  | -3.87731 |
| C | 4.12904  | 3.62493  | -3.80497 |
| H | 4.98222  | 3.14468  | -3.31032 |
| H | 4.43393  | 3.96467  | -4.80722 |
| H | 3.79846  | 4.48925  | -3.21559 |
| H | -0.48755 | 2.80419  | -1.23808 |

Electronic energy (a.u.) at  $\omega$ B97xd/def2-SVP: -2143.4281691

Gibbs free energy correction (a.u.) at  $\omega$ B97X-D/def2-SVP: 0.503657

Electronic energy (a.u.) at  $\omega$ B97X-D/def2-TZVPP: -2145.4459093

Electronic energy (a.u.) at DLPNO-CCSD(T)/def2-TZVPP: -2141.679212

Number of imaginary frequencies: 0

**7' + NMN (reactants - endo)**

|   |          |          |         |
|---|----------|----------|---------|
| W | -0.02511 | -0.31985 | 0.85072 |
|---|----------|----------|---------|

|   |          |          |          |
|---|----------|----------|----------|
| P | 1.77312  | -2.04725 | 1.14767  |
| O | 1.47781  | 1.47615  | 2.65599  |
| N | -2.04260 | 0.69303  | 0.93179  |
| N | -3.18101 | -0.02186 | 1.00469  |
| N | -1.22983 | -1.82006 | -0.46466 |
| N | -2.47088 | -2.17704 | -0.08897 |
| N | -1.07905 | -1.33193 | 2.54509  |
| N | -2.31036 | -1.85597 | 2.42035  |
| N | 0.85795  | 0.77223  | 1.91840  |
| C | 2.56468  | 0.63745  | -0.86409 |
| H | 3.45685  | 0.01511  | -0.99301 |
| C | 1.26766  | 0.01921  | -0.97860 |
| H | 1.24516  | -0.86610 | -1.61803 |
| C | 0.10043  | 0.91856  | -0.99771 |
| C | 0.33551  | 2.33313  | -0.92259 |
| C | 4.04019  | 2.57398  | -0.44405 |
| H | 4.91036  | 1.91199  | -0.41480 |
| C | 1.79848  | 4.28371  | -0.51849 |
| H | 0.92896  | 4.94580  | -0.54916 |
| C | 2.73542  | 1.98065  | -0.62044 |
| C | 1.57922  | 2.86432  | -0.65763 |
| C | 4.19208  | 3.91695  | -0.31180 |
| C | 3.04738  | 4.79105  | -0.35056 |
| C | -4.23626 | 0.80871  | 1.10407  |
| H | -5.24547 | 0.41119  | 1.17828  |
| C | -3.76884 | 2.11223  | 1.09710  |
| H | -4.34870 | 3.02790  | 1.16200  |
| C | -2.37703 | 1.97979  | 0.99192  |
| H | -1.60115 | 2.74105  | 0.96455  |
| C | -3.00720 | -3.01354 | -0.99353 |
| H | -4.01289 | -3.40311 | -0.85626 |
| C | -2.08131 | -3.21398 | -2.00536 |
| H | -2.18432 | -3.82819 | -2.89476 |
| C | -0.98113 | -2.43633 | -1.62380 |
| H | -0.04741 | -2.27770 | -2.16121 |
| C | -2.72976 | -2.32430 | 3.60968  |
| H | -3.71604 | -2.77069 | 3.70972  |
| C | -1.73262 | -2.09940 | 4.54620  |
| H | -1.74275 | -2.34951 | 5.60273  |
| C | -0.71967 | -1.45763 | 3.82232  |
| H | 0.23911  | -1.06545 | 4.15643  |
| C | 3.26379  | -1.36373 | 1.95427  |
| H | 4.04309  | -2.12703 | 2.09475  |
| H | 2.97686  | -0.93479 | 2.92472  |
| H | 3.64936  | -0.53620 | 1.34295  |
| C | 2.44565  | -2.92726 | -0.31802 |

|   |          |          |          |
|---|----------|----------|----------|
| H | 2.89350  | -2.22350 | -1.03096 |
| H | 1.62954  | -3.46008 | -0.82676 |
| H | 3.20845  | -3.65736 | -0.00996 |
| C | 1.34750  | -3.48923 | 2.20582  |
| H | 0.42798  | -3.95568 | 1.82225  |
| H | 1.15546  | -3.16564 | 3.23627  |
| H | 2.15989  | -4.23089 | 2.20895  |
| B | -3.14589 | -1.55981 | 1.15239  |
| H | -4.26798 | -2.00247 | 1.27464  |
| H | -0.77645 | 0.61632  | -1.58065 |
| H | 5.18669  | 4.34672  | -0.17311 |
| H | 3.19401  | 5.86780  | -0.24080 |
| C | -0.04053 | 2.15111  | -4.09042 |
| C | 1.42544  | 2.38434  | -3.88077 |
| C | 2.05294  | 1.20556  | -3.91604 |
| C | 1.03035  | 0.12738  | -4.11356 |
| H | 1.83839  | 3.37899  | -3.72598 |
| O | -0.93598 | 2.95399  | -4.12570 |
| O | 1.19121  | -1.07061 | -4.13121 |
| H | 3.11206  | 0.98899  | -3.79960 |
| N | -0.19004 | 0.77066  | -4.24889 |
| C | -1.45719 | 0.09874  | -4.38281 |
| H | -1.42676 | -0.61216 | -5.21978 |
| H | -1.71639 | -0.45129 | -3.46440 |
| H | -2.22097 | 0.86321  | -4.57234 |
| H | -0.50014 | 3.01186  | -1.11386 |

Electronic energy (a.u.) at  $\omega$ B97xd/def2-SVP: -2143.4308494

Gibbs free energy correction (a.u.) at  $\omega$ B97X-D/def2-SVP: 0.504392

Electronic energy (a.u.) at  $\omega$ B97X-D/def2-TZVPP: -2145.4484644

Electronic energy (a.u.) at DLPNO-CCSD(T)/def2-TZVPP: -2141.680306

Number of imaginary frequencies: 0

**7' + NMN (Transition state - exo)**

|   |          |          |          |
|---|----------|----------|----------|
| W | -0.35026 | -0.62460 | 0.09698  |
| P | 1.22109  | -2.56508 | 0.41253  |
| O | 1.52475  | 0.99126  | 1.70965  |
| N | -2.17611 | 0.69205  | 0.26610  |
| N | -3.39487 | 0.17934  | 0.51761  |
| N | -1.89502 | -2.03892 | -0.91282 |
| N | -3.13106 | -2.15398 | -0.39718 |
| N | -1.36118 | -1.31100 | 1.97997  |
| N | -2.66448 | -1.63519 | 2.03287  |
| N | 0.76904  | 0.37536  | 1.02300  |
| C | 2.16870  | -0.20148 | -1.96805 |



|   |          |          |          |
|---|----------|----------|----------|
| H | 2.93970  | -0.94618 | -2.18950 |
| C | 0.78642  | -0.62790 | -1.85153 |
| H | 0.54116  | -1.49678 | -2.47298 |
| C | -0.20442 | 0.46256  | -1.82323 |
| C | 0.33133  | 1.80351  | -1.90442 |
| C | 3.94049  | 1.33406  | -1.11625 |
| H | 4.68240  | 0.53380  | -1.16652 |
| C | 2.04760  | 3.41027  | -1.07293 |
| H | 1.31619  | 4.22108  | -1.08529 |
| C | 2.58801  | 1.04158  | -1.44724 |
| C | 1.62473  | 2.09765  | -1.42324 |
| C | 4.30584  | 2.60039  | -0.73806 |
| C | 3.34997  | 3.65045  | -0.71891 |
| C | -4.29693 | 1.17367  | 0.61744  |
| H | -5.34112 | 0.95216  | 0.82390  |
| C | -3.64230 | 2.37897  | 0.42487  |
| H | -4.06771 | 3.37781  | 0.43990  |
| C | -2.30553 | 2.01569  | 0.21171  |
| H | -1.43232 | 2.63778  | 0.03086  |
| C | -3.85832 | -3.01963 | -1.12244 |
| H | -4.88935 | -3.23524 | -0.85340 |
| C | -3.06863 | -3.49393 | -2.15865 |
| H | -3.34057 | -4.20351 | -2.93414 |
| C | -1.84435 | -2.84085 | -1.97894 |
| H | -0.93777 | -2.90888 | -2.57522 |
| C | -3.01565 | -1.90791 | 3.30216  |
| H | -4.04150 | -2.17328 | 3.54582  |
| C | -1.89768 | -1.75897 | 4.10863  |
| H | -1.82848 | -1.89831 | 5.18318  |
| C | -0.88560 | -1.36624 | 3.22396  |
| H | 0.15116  | -1.09889 | 3.42066  |
| C | 2.87513  | -2.02367 | 0.96848  |
| H | 3.53349  | -2.87828 | 1.18179  |
| H | 2.76449  | -1.39583 | 1.86390  |
| H | 3.32300  | -1.39100 | 0.19049  |
| C | 1.59824  | -3.67701 | -0.99872 |
| H | 2.02719  | -3.10783 | -1.83327 |
| H | 0.67357  | -4.16448 | -1.33925 |
| H | 2.31467  | -4.45345 | -0.69280 |
| C | 0.73904  | -3.80829 | 1.67731  |
| H | -0.27499 | -4.17309 | 1.45683  |
| H | 0.72261  | -3.35179 | 2.67469  |
| H | 1.44006  | -4.65594 | 1.68394  |
| B | -3.57693 | -1.32354 | 0.82357  |
| H | -4.73335 | -1.56937 | 1.09057  |
| H | -1.14063 | 0.30252  | -2.37229 |

|   |          |          |          |
|---|----------|----------|----------|
| H | 5.34112  | 2.80955  | -0.45984 |
| H | 3.66018  | 4.65594  | -0.42698 |
| C | 3.30088  | 1.13370  | -4.27816 |
| C | 1.94193  | 0.53534  | -4.17821 |
| C | 1.02083  | 1.56449  | -4.16718 |
| C | 1.76047  | 2.85010  | -4.24470 |
| H | 1.76601  | -0.49701 | -4.47086 |
| O | 4.37504  | 0.58324  | -4.34964 |
| O | 1.32914  | 3.97863  | -4.28026 |
| H | -0.03255 | 1.50903  | -4.42938 |
| N | 3.11644  | 2.51326  | -4.24622 |
| C | 4.19181  | 3.46879  | -4.22834 |
| H | 4.89323  | 3.22926  | -3.41699 |
| H | 4.73891  | 3.46898  | -5.18318 |
| H | 3.75240  | 4.45961  | -4.05791 |
| H | -0.35223 | 2.63616  | -2.09073 |

Electronic energy (a.u.) at  $\omega$ B97xd/def2-SVP: -2143.4172243

Gibbs free energy correction (a.u.) at  $\omega$ B97X-D/def2-SVP: 0.506790

Electronic energy (a.u.) at  $\omega$ B97X-D/def2-TZVPP: -2145.4317916

Electronic energy (a.u.) at DLPNO-CCSD(T)/def2-TZVPP: -2141.669989

Number of imaginary frequencies: 1

**7' + NMN (Transition state - endo)**

|   |          |          |          |
|---|----------|----------|----------|
| W | -0.00949 | -0.97357 | 0.69536  |
| P | 1.81008  | -2.70696 | 0.87722  |
| O | 1.61811  | 0.76050  | 2.44986  |
| N | -2.00304 | 0.05852  | 0.91750  |
| N | -3.14085 | -0.63790 | 1.09396  |
| N | -1.31781 | -2.50466 | -0.46809 |
| N | -2.53901 | -2.82374 | -0.00486 |
| N | -0.93966 | -1.94960 | 2.48634  |
| N | -2.18442 | -2.45683 | 2.47302  |
| N | 0.95361  | 0.09808  | 1.71260  |
| C | 2.42993  | -0.08837 | -1.31432 |
| H | 3.28109  | -0.72517 | -1.57330 |
| C | 1.12195  | -0.69898 | -1.21709 |
| H | 0.99904  | -1.56497 | -1.87239 |
| C | -0.00967 | 0.25247  | -1.14289 |
| C | 0.34387  | 1.64826  | -1.15029 |
| C | 3.98470  | 1.62369  | -0.37125 |
| H | 4.82600  | 0.92947  | -0.45024 |
| C | 1.83450  | 3.41600  | -0.20858 |
| H | 0.99711  | 4.11679  | -0.15788 |
| C | 2.68450  | 1.17248  | -0.72071 |

|   |          |          |          |
|---|----------|----------|----------|
| C | 1.59174  | 2.08577  | -0.64204 |
| C | 4.18399  | 2.90671  | 0.07587  |
| C | 3.09642  | 3.81296  | 0.15935  |
| C | -4.17747 | 0.20894  | 1.23486  |
| H | -5.18367 | -0.17226 | 1.39044  |
| C | -3.69793 | 1.50552  | 1.14829  |
| H | -4.26256 | 2.43025  | 1.21781  |
| C | -2.31917 | 1.35104  | 0.95118  |
| H | -1.54030 | 2.10121  | 0.83841  |
| C | -3.13271 | -3.70342 | -0.82826 |
| H | -4.13249 | -4.07249 | -0.61351 |
| C | -2.26618 | -3.97541 | -1.87585 |
| H | -2.42605 | -4.63949 | -2.71983 |
| C | -1.13990 | -3.19278 | -1.59866 |
| H | -0.22049 | -3.09388 | -2.17132 |
| C | -2.51383 | -2.88807 | 3.70353  |
| H | -3.49531 | -3.31547 | 3.89361  |
| C | -1.44200 | -2.65605 | 4.55204  |
| H | -1.37145 | -2.87982 | 5.61215  |
| C | -0.48159 | -2.04808 | 3.73407  |
| H | 0.50364  | -1.65736 | 3.98216  |
| C | 3.38290  | -1.98817 | 1.46791  |
| H | 4.15085  | -2.76040 | 1.62056  |
| H | 3.19686  | -1.44608 | 2.40591  |
| H | 3.73633  | -1.24865 | 0.73757  |
| C | 2.30326  | -3.66898 | -0.60683 |
| H | 2.57536  | -3.01292 | -1.44431 |
| H | 1.46028  | -4.30107 | -0.92123 |
| H | 3.15818  | -4.31898 | -0.36923 |
| C | 1.51664  | -4.08152 | 2.06109  |
| H | 0.55317  | -4.55876 | 1.82929  |
| H | 1.46448  | -3.69781 | 3.08755  |
| H | 2.32007  | -4.83040 | 1.99995  |
| B | -3.11396 | -2.17196 | 1.26912  |
| H | -4.22803 | -2.59781 | 1.48473  |
| H | -0.92382 | 0.00553  | -1.69592 |
| H | 5.18367  | 3.23557  | 0.36790  |
| H | 3.26825  | 4.83040  | 0.51693  |
| C | -0.03550 | 1.12674  | -3.96704 |
| C | 1.18612  | 1.74253  | -3.39577 |
| C | 2.20460  | 0.80628  | -3.44476 |
| C | 1.65227  | -0.44457 | -4.03368 |
| H | 1.29297  | 2.82164  | -3.32633 |
| O | -1.13853 | 1.59320  | -4.12574 |
| O | 2.19910  | -1.50951 | -4.22135 |
| H | 3.27234  | 1.00855  | -3.46517 |

|   |          |          |          |
|---|----------|----------|----------|
| N | 0.30781  | -0.19134 | -4.28882 |
| C | -0.63991 | -1.17385 | -4.74091 |
| H | -0.07964 | -2.07618 | -5.01824 |
| H | -1.36599 | -1.42046 | -3.94938 |
| H | -1.19493 | -0.79931 | -5.61215 |
| H | -0.45000 | 2.38267  | -1.31039 |

Electronic energy (a.u.) at  $\omega$ B97xd/def2-SVP: -2143.4171354

Gibbs free energy correction (a.u.) at  $\omega$ B97X-D/def2-SVP: 0.507442

Electronic energy (a.u.) at  $\omega$ B97X-D/def2-TZVPP: -2145.4319943

Electronic energy (a.u.) at DLPNO-CCSD(T)/def2-TZVPP: -2141.668384

Number of imaginary frequencies: 1

**7' + NMN (Product - exo)**

|   |          |          |          |
|---|----------|----------|----------|
| W | -0.39962 | -0.44889 | 0.54676  |
| P | 1.14642  | -2.41153 | 0.86628  |
| O | 1.41739  | 1.05660  | 2.31642  |
| N | -2.22225 | 0.86494  | 0.73898  |
| N | -3.43466 | 0.36835  | 1.04411  |
| N | -1.98568 | -1.87734 | -0.37602 |
| N | -3.20495 | -1.98374 | 0.17955  |
| N | -1.37555 | -1.10025 | 2.48195  |
| N | -2.67714 | -1.41574 | 2.58470  |
| N | 0.71310  | 0.51822  | 1.51440  |
| C | 2.08391  | 0.02731  | -1.73484 |
| H | 2.86333  | -0.74910 | -1.73521 |
| C | 0.68633  | -0.51042 | -1.39197 |
| H | 0.45217  | -1.39113 | -2.00573 |
| C | -0.30268 | 0.55843  | -1.37912 |
| C | 0.31334  | 1.91709  | -1.72745 |
| C | 3.65134  | 1.35292  | -0.16038 |
| H | 4.41821  | 0.57479  | -0.19752 |
| C | 1.71881  | 3.37747  | -0.12512 |
| H | 0.97212  | 4.17574  | -0.13267 |
| C | 2.45864  | 1.19047  | -0.85437 |
| C | 1.49545  | 2.21095  | -0.84541 |
| C | 3.87178  | 2.52307  | 0.56891  |
| C | 2.90813  | 3.52806  | 0.59078  |
| C | -4.33455 | 1.36738  | 1.10471  |
| H | -5.37454 | 1.15881  | 1.34331  |
| C | -3.68416 | 2.55938  | 0.82963  |
| H | -4.10970 | 3.55770  | 0.79581  |
| C | -2.35248 | 2.18286  | 0.60838  |
| H | -1.48262 | 2.78970  | 0.36932  |
| C | -3.95628 | -2.85521 | -0.51382 |
| H | -4.97919 | -3.06467 | -0.21105 |

|   |          |          |          |
|---|----------|----------|----------|
| C | -3.20023 | -3.34216 | -1.56906 |
| H | -3.49796 | -4.05905 | -2.32822 |
| C | -1.96971 | -2.68920 | -1.43515 |
| H | -1.08213 | -2.75979 | -2.05913 |
| C | -2.99000 | -1.64925 | 3.87176  |
| H | -4.00913 | -1.90075 | 4.15524  |
| C | -1.84592 | -1.48380 | 4.63770  |
| H | -1.74347 | -1.59244 | 5.71317  |
| C | -0.86031 | -1.12119 | 3.71042  |
| H | 0.18153  | -0.84437 | 3.86590  |
| C | 2.82606  | -1.89195 | 1.36016  |
| H | 3.44216  | -2.74785 | 1.67205  |
| H | 2.75217  | -1.15409 | 2.17213  |
| H | 3.29856  | -1.38646 | 0.50838  |
| C | 1.46685  | -3.55276 | -0.53299 |
| H | 1.88852  | -2.99906 | -1.38185 |
| H | 0.52614  | -4.02586 | -0.84845 |
| H | 2.17444  | -4.33837 | -0.22984 |
| C | 0.67959  | -3.61781 | 2.17267  |
| H | -0.34819 | -3.96610 | 1.99295  |
| H | 0.70369  | -3.13772 | 3.15892  |
| H | 1.36357  | -4.47935 | 2.17696  |
| B | -3.61775 | -1.12593 | 1.39404  |
| H | -4.76932 | -1.35828 | 1.69321  |
| H | -1.24033 | 0.37632  | -1.92438 |
| H | 4.80434  | 2.65004  | 1.12285  |
| H | 3.08507  | 4.44011  | 1.16474  |
| C | 3.21953  | 1.27392  | -3.64677 |
| C | 1.93797  | 0.61348  | -3.17312 |
| C | 0.88722  | 1.74108  | -3.16848 |
| C | 1.63467  | 2.97524  | -3.64063 |
| H | 1.68546  | -0.19936 | -3.87016 |
| O | 4.30013  | 0.75793  | -3.78780 |
| O | 1.19248  | 4.08764  | -3.77779 |
| H | 0.05608  | 1.54988  | -3.86297 |
| N | 2.95681  | 2.61548  | -3.87831 |
| C | 3.98282  | 3.55679  | -4.25743 |
| H | 4.68744  | 3.70872  | -3.42688 |
| H | 4.53950  | 3.17819  | -5.12512 |
| H | 3.49282  | 4.50681  | -4.50241 |
| H | -0.41854 | 2.73618  | -1.72206 |

Electronic energy (a.u.) at  $\omega$ B97xd/def2-SVP: -2143.5081073

Gibbs free energy correction (a.u.) at  $\omega$ B97X-D/def2-SVP: 0.512227

Electronic energy (a.u.) at  $\omega$ B97X-D/def2-TZVPP: -2145.5161838

Electronic energy (a.u.) at DLPNO-CCSD(T)/def2-TZVPP: -2141.74774

Number of imaginary frequencies: 0

**7' + NMN (Product - endo)**

|   |          |          |          |
|---|----------|----------|----------|
| W | -0.05792 | -0.20039 | 0.64842  |
| P | 1.74314  | -1.95396 | 0.82891  |
| O | 1.58312  | 1.45917  | 2.45372  |
| N | -2.03902 | 0.83776  | 0.92753  |
| N | -3.16574 | 0.16388  | 1.22041  |
| N | -1.45193 | -1.77969 | -0.34095 |
| N | -2.63552 | -2.08197 | 0.21994  |
| N | -0.89879 | -1.08188 | 2.55332  |
| N | -2.14233 | -1.58076 | 2.64959  |
| N | 0.93544  | 0.86387  | 1.64331  |
| C | 2.27993  | 0.69469  | -1.66437 |
| H | 3.15212  | 0.02578  | -1.70069 |
| C | 0.98097  | -0.03907 | -1.29748 |
| H | 0.85869  | -0.93552 | -1.91656 |
| C | -0.14750 | 0.88068  | -1.23610 |
| C | 0.26211  | 2.31805  | -1.57154 |
| C | 3.66784  | 2.17065  | -0.05331 |
| H | 4.53065  | 1.50120  | -0.10903 |
| C | 1.47185  | 3.89858  | 0.07787  |
| H | 0.61450  | 4.57589  | 0.12363  |
| C | 2.50951  | 1.87899  | -0.76208 |
| C | 1.41239  | 2.75316  | -0.70499 |
| C | 3.72761  | 3.32483  | 0.73129  |
| C | 2.63292  | 4.18152  | 0.80141  |
| C | -4.19493 | 1.02363  | 1.33319  |
| H | -5.19243 | 0.66152  | 1.56949  |
| C | -3.72101 | 2.30563  | 1.10644  |
| H | -4.28256 | 3.23476  | 1.11923  |
| C | -2.35354 | 2.12878  | 0.85650  |
| H | -1.57993 | 2.85984  | 0.63495  |
| C | -3.28317 | -2.99253 | -0.52586 |
| H | -4.26447 | -3.35294 | -0.22746 |
| C | -2.49290 | -3.30221 | -1.62210 |
| H | -2.71092 | -3.99762 | -2.42694 |
| C | -1.35375 | -2.50637 | -1.45644 |
| H | -0.47876 | -2.41973 | -2.09649 |
| C | -2.39709 | -1.92778 | 3.92374  |
| H | -3.36646 | -2.33431 | 4.20171  |
| C | -1.27375 | -1.64819 | 4.68721  |
| H | -1.13847 | -1.80235 | 5.75347  |
| C | -0.36415 | -1.10031 | 3.77339  |
| H | 0.63233  | -0.69135 | 3.93413  |
| C | 3.36048  | -1.23654 | 1.28373  |

|   |          |          |          |
|---|----------|----------|----------|
| H | 4.08862  | -2.01506 | 1.55436  |
| H | 3.22139  | -0.53238 | 2.11689  |
| H | 3.73848  | -0.65971 | 0.43044  |
| C | 2.14287  | -2.99193 | -0.62974 |
| H | 2.42182  | -2.36896 | -1.49020 |
| H | 1.26413  | -3.59384 | -0.90222 |
| H | 2.97511  | -3.67117 | -0.39337 |
| C | 1.49835  | -3.25798 | 2.10155  |
| H | 0.51366  | -3.72617 | 1.95689  |
| H | 1.51712  | -2.81689 | 3.10602  |
| H | 2.28320  | -4.02584 | 2.03378  |
| B | -3.13624 | -1.35834 | 1.48768  |
| H | -4.23930 | -1.76238 | 1.78711  |
| H | -1.07035 | 0.58109  | -1.75344 |
| H | 4.63392  | 3.55085  | 1.29704  |
| H | 2.68061  | 5.07704  | 1.42458  |
| C | -0.16939 | 1.72808  | -4.01700 |
| C | 0.83683  | 2.27655  | -3.02370 |
| C | 2.02417  | 1.29329  | -3.08065 |
| C | 1.59846  | 0.21870  | -4.06440 |
| H | 1.11429  | 3.29300  | -3.33877 |
| O | -1.24880 | 2.17989  | -4.30245 |
| O | 2.20380  | -0.78346 | -4.35987 |
| H | 2.94341  | 1.76490  | -3.45852 |
| N | 0.34944  | 0.55821  | -4.56238 |
| C | -0.39380 | -0.26467 | -5.48535 |
| H | 0.28114  | -1.04213 | -5.86340 |
| H | -1.25144 | -0.73350 | -4.97959 |
| H | -0.77360 | 0.34826  | -6.31348 |
| H | -0.58356 | 3.01811  | -1.53033 |

Electronic energy (a.u.) at  $\omega$ B97xd/def2-SVP: -2143.5096698

Gibbs free energy correction (a.u.) at  $\omega$ B97X-D/def2-SVP: 0.512860

Electronic energy (a.u.) at  $\omega$ B97X-D/def2-TZVPP: -2145.5175244

Electronic energy (a.u.) at DLPNO-CCSD(T)/def2-TZVPP: -2141.748484

Number of imaginary frequencies: 0

#### 16 + NMN (reactants - exo)

|    |          |          |          |
|----|----------|----------|----------|
| C  | -1.02597 | -1.39163 | -2.47721 |
| C  | -1.13309 | 1.19470  | -2.87771 |
| C  | -3.25111 | -0.11175 | -2.18264 |
| O  | -0.67418 | -2.31043 | -3.07144 |
| O  | -0.84975 | 1.91668  | -3.72620 |
| O  | -4.31798 | -0.21969 | -2.60298 |
| Cr | -1.56966 | 0.06627  | -1.48433 |
| C  | 2.47692  | -0.25624 | -0.37190 |

|   |          |          |          |
|---|----------|----------|----------|
| C | 1.35105  | -0.97811 | -0.08639 |
| C | 0.08299  | -0.33281 | 0.04478  |
| C | 0.00390  | 1.08005  | -0.16207 |
| C | 1.19710  | 1.79657  | -0.48181 |
| C | 2.39970  | 1.14988  | -0.56645 |
| H | -1.06167 | -2.14410 | 0.47718  |
| H | 1.40175  | -2.05808 | 0.06911  |
| C | -1.11972 | -1.06427 | 0.34169  |
| C | -1.27999 | 1.72388  | -0.07956 |
| H | 1.13202  | 2.87525  | -0.63978 |
| C | -2.41564 | 1.00584  | 0.30949  |
| C | -2.33307 | -0.39762 | 0.52714  |
| H | -1.35130 | 2.79190  | -0.28867 |
| H | -3.37870 | 1.51103  | 0.38645  |
| H | -3.23125 | -0.96324 | 0.77465  |
| C | 2.88857  | 0.21890  | 2.89533  |
| C | 1.74418  | 1.19165  | 2.95724  |
| C | 0.61129  | 0.50455  | 3.10600  |
| C | 0.94231  | -0.96099 | 3.15590  |
| H | 1.89341  | 2.26607  | 2.86884  |
| O | 4.05722  | 0.44582  | 2.72742  |
| O | 0.18511  | -1.89292 | 3.24223  |
| H | -0.41412 | 0.86544  | 3.16704  |
| N | 2.32711  | -1.04416 | 3.05802  |
| C | 3.07149  | -2.27539 | 2.97693  |
| H | 2.37740  | -3.10024 | 3.18075  |
| H | 3.50774  | -2.40346 | 1.97457  |
| H | 3.88376  | -2.28440 | 3.71626  |
| H | 3.44486  | -0.75513 | -0.44622 |
| H | 3.30886  | 1.71126  | -0.78836 |

Electronic energy (a.u.) at  $\omega$ B97xd/def2-SVP: -2167.8390907

Gibbs free energy correction (a.u.) at  $\omega$ B97X-D/def2-SVP: 0.218294

Electronic energy (a.u.) at  $\omega$ B97X-D/def2-TZVPP: -2169.2313399

Electronic energy (a.u.) at DLPNO-CCSD(T)/def2-TZVPP: -2166.660066

Number of imaginary frequencies: 0

**16 + NMN (reactants - endo)**

|    |          |          |          |
|----|----------|----------|----------|
| C  | -0.49158 | -1.39577 | -2.74181 |
| C  | 0.24898  | 1.11012  | -2.90211 |
| C  | -2.25317 | 0.49430  | -2.71004 |
| O  | -0.31789 | -2.35274 | -3.35440 |
| O  | 0.89187  | 1.74083  | -3.61632 |
| O  | -3.20306 | 0.73630  | -3.31453 |
| Cr | -0.76142 | 0.11683  | -1.71966 |
| C  | 2.68390  | -1.53676 | -0.05890 |



|   |          |          |          |
|---|----------|----------|----------|
| C | 1.35759  | -1.86401 | 0.02754  |
| C | 0.35284  | -0.84819 | 0.02412  |
| C | 0.75747  | 0.52103  | -0.06356 |
| C | 2.15162  | 0.82298  | -0.14467 |
| C | 3.08548  | -0.17780 | -0.14606 |
| H | -1.36005 | -2.20562 | 0.07730  |
| H | 1.04178  | -2.90675 | 0.10038  |
| C | -1.05126 | -1.16081 | 0.04390  |
| C | -0.25196 | 1.54399  | -0.12880 |
| H | 2.45351  | 1.87059  | -0.20567 |
| C | -1.60600 | 1.21835  | -0.01822 |
| C | -2.00845 | -0.14348 | 0.06848  |
| H | 0.05567  | 2.58490  | -0.22857 |
| H | -2.35878 | 2.00585  | -0.05837 |
| H | -3.06863 | -0.39614 | 0.09444  |
| C | 0.09793  | -1.01032 | 3.27240  |
| C | 1.59797  | -0.96121 | 3.19373  |
| C | 1.97750  | 0.31464  | 3.11021  |
| C | 0.75004  | 1.18159  | 3.12863  |
| H | 2.20647  | -1.86317 | 3.20101  |
| O | -0.61530 | -1.97761 | 3.33205  |
| O | 0.68149  | 2.38009  | 3.04577  |
| H | 2.97874  | 0.73309  | 3.03107  |
| N | -0.33041 | 0.31313  | 3.24782  |
| C | -1.70526 | 0.72955  | 3.36675  |
| H | -1.83054 | 1.68378  | 2.84010  |
| H | -2.34818 | -0.03633 | 2.91539  |
| H | -1.99341 | 0.86218  | 4.42084  |
| H | 3.44020  | -2.32410 | -0.06086 |
| H | 4.14704  | 0.06784  | -0.21427 |

Electronic energy (a.u.) at  $\omega$ B97xd/def2-SVP: -2167.8416794

Gibbs free energy correction (a.u.) at  $\omega$ B97X-D/def2-SVP: 0.220489

Electronic energy (a.u.) at  $\omega$ B97X-D/def2-TZVPP: -2169.2335287

Electronic energy (a.u.) at DLPNO-CCSD(T)/def2-TZVPP: -2166.662883

Number of imaginary frequencies: 0

**16 + NMN (Transition state - exo)**

|    |          |          |          |
|----|----------|----------|----------|
| C  | -2.38032 | -2.31909 | 0.39019  |
| C  | -1.64495 | 0.16851  | 0.16928  |
| C  | -4.16401 | -0.45138 | 0.14504  |
| O  | -2.12562 | -3.30469 | -0.14380 |
| O  | -0.92429 | 0.75850  | -0.50450 |
| O  | -5.05145 | -0.25156 | -0.55933 |
| Cr | -2.76759 | -0.76163 | 1.29866  |

|   |          |          |         |
|---|----------|----------|---------|
| C | 0.51106  | -2.31125 | 2.79851 |
| C | -0.76200 | -2.57940 | 3.34540 |
| C | -1.82732 | -1.61567 | 3.13291 |
| C | -1.42950 | -0.26142 | 3.01263 |
| C | -0.00458 | -0.00120 | 3.11721 |
| C | 0.89760  | -0.99547 | 2.68211 |
| H | -3.51879 | -2.99787 | 3.14473 |
| H | -1.04645 | -3.61584 | 3.54156 |
| C | -3.21594 | -1.95128 | 3.09522 |
| C | -2.42048 | 0.75599  | 2.85443 |
| H | 0.32173  | 1.04140  | 3.12844 |
| C | -3.77998 | 0.41814  | 2.85346 |
| C | -4.17965 | -0.94174 | 2.97491 |
| H | -2.11118 | 1.79300  | 2.71861 |
| H | -4.53207 | 1.19362  | 2.70786 |
| H | -5.23648 | -1.20344 | 2.92176 |
| C | 1.47883  | -0.42844 | 5.49586 |
| C | 0.00176  | -0.49151 | 5.26409 |
| C | -0.39084 | -1.82597 | 5.38389 |
| C | 0.82841  | -2.63598 | 5.69319 |
| H | -0.61761 | 0.37039  | 5.50576 |
| O | 2.19867  | 0.53661  | 5.53098 |
| O | 0.91178  | -3.81605 | 5.91942 |
| H | -1.36411 | -2.16718 | 5.73203 |
| N | 1.90194  | -1.74666 | 5.65166 |
| C | 3.28095  | -2.13128 | 5.82599 |
| H | 3.29986  | -3.14934 | 6.23444 |
| H | 3.82134  | -2.11522 | 4.86746 |
| H | 3.77453  | -1.43598 | 6.51774 |
| H | 1.21530  | -3.12806 | 2.63324 |
| H | 1.92157  | -0.72399 | 2.42070 |

Electronic energy (a.u.) at  $\omega$ B97xd/def2-SVP: -2167.7989467

Gibbs free energy correctio (a.u.) at  $\omega$ B97X-D/def2-SVP: 0.224068

Electronic energy (a.u.) at  $\omega$ B97X-D/def2-TZVPP: -2169.1872972

Electronic energy (a.u.) at DLPNO-CCSD(T)/def2-TZVPP: -2166.621342

Number of imaginary frequencies: 1

**16 + NMN (Transition state - endo)**

|    |          |          |          |
|----|----------|----------|----------|
| C  | -0.63049 | -1.39486 | -3.02693 |
| C  | 0.10681  | 1.09440  | -3.20466 |
| C  | -2.40780 | 0.47017  | -3.32886 |
| O  | -0.35196 | -2.37698 | -3.55626 |
| O  | 0.85251  | 1.68956  | -3.84651 |
| O  | -3.26814 | 0.67231  | -4.06567 |
| Cr | -1.05561 | 0.15543  | -2.12623 |

|   |          |          |          |
|---|----------|----------|----------|
| C | 2.16278  | -1.40000 | -0.48539 |
| C | 0.86244  | -1.67091 | 0.00153  |
| C | -0.18865 | -0.70973 | -0.26111 |
| C | 0.21381  | 0.64680  | -0.35920 |
| C | 1.62747  | 0.90847  | -0.18748 |
| C | 2.55249  | -0.08650 | -0.58081 |
| H | -1.87929 | -2.09122 | -0.30593 |
| H | 0.55782  | -2.70480 | 0.18014  |
| C | -1.57503 | -1.04578 | -0.35351 |
| C | -0.77109 | 1.66599  | -0.54659 |
| H | 1.94007  | 1.95485  | -0.15718 |
| C | -2.12740 | 1.32646  | -0.60073 |
| C | -2.53102 | -0.03489 | -0.50581 |
| H | -0.45728 | 2.70480  | -0.64756 |
| H | -2.87397 | 2.10320  | -0.76617 |
| H | -3.58523 | -0.29600 | -0.59938 |
| C | -0.17229 | -0.98004 | 2.57984  |
| C | 1.23180  | -0.95728 | 2.05677  |
| C | 1.62563  | 0.38025  | 1.96415  |
| C | 0.47742  | 1.22667  | 2.41987  |
| H | 1.89083  | -1.79449 | 2.27573  |
| O | -0.87005 | -1.93158 | 2.82408  |
| O | 0.41844  | 2.42739  | 2.50333  |
| H | 2.63961  | 0.75107  | 2.09607  |
| N | -0.56547 | 0.34848  | 2.70810  |
| C | -1.89735 | 0.75770  | 3.07769  |
| H | -1.91225 | 1.85418  | 3.10603  |
| H | -2.62852 | 0.39514  | 2.34086  |
| H | -2.16421 | 0.35737  | 4.06567  |
| H | 2.87254  | -2.21622 | -0.63047 |
| H | 3.58523  | 0.18600  | -0.80479 |

Electronic energy (a.u.) at  $\omega$ B97xd/def2-SVP: -2167.8018975

Gibbs free energy correction (a.u.) at  $\omega$ B97X-D/def2-SVP: 0.225573

Electronic energy (a.u.) at  $\omega$ B97X-D/def2-TZVPP: -2169.1891944

Electronic energy (a.u.) at DLPNO-CCSD(T)/def2-TZVPP: -2166.624908

Number of imaginary frequencies: 1

**16 + NMN (Product - exo)**

|    |          |          |          |
|----|----------|----------|----------|
| C  | -1.10789 | -1.23550 | -2.28743 |
| C  | -0.37720 | 1.22694  | -2.51530 |
| C  | -2.89010 | 0.60241  | -2.73205 |
| O  | -0.79343 | -2.23015 | -2.77305 |
| O  | 0.40059  | 1.79437  | -3.14548 |
| O  | -3.72173 | 0.77755  | -3.50690 |
| Cr | -1.58881 | 0.33436  | -1.45587 |

|   |          |          |          |
|---|----------|----------|----------|
| C | 1.47434  | -1.15355 | -0.18360 |
| C | 0.34489  | -1.38141 | 0.79793  |
| C | -0.80783 | -0.45758 | 0.44841  |
| C | -0.40956 | 0.88704  | 0.32385  |
| C | 1.07533  | 1.08471  | 0.56986  |
| C | 1.85192  | 0.12107  | -0.30136 |
| H | -2.47932 | -1.85880 | 0.39024  |
| H | 0.03749  | -2.43110 | 0.87001  |
| C | -2.17642 | -0.81266 | 0.33049  |
| C | -1.37306 | 1.89930  | 0.07907  |
| H | 1.38793  | 2.12830  | 0.44835  |
| C | -2.73044 | 1.54938  | -0.02829 |
| C | -3.13289 | 0.19109  | 0.09790  |
| H | -1.05919 | 2.93538  | -0.05418 |
| H | -3.47261 | 2.31612  | -0.25077 |
| H | -4.18173 | -0.07748 | -0.02854 |
| C | 2.73776  | 0.63106  | 2.46112  |
| C | 1.27478  | 0.61534  | 2.04697  |
| C | 0.84033  | -0.85310 | 2.18269  |
| C | 2.08008  | -1.58961 | 2.66564  |
| H | 0.71891  | 1.28525  | 2.71882  |
| O | 3.48007  | 1.57767  | 2.47518  |
| O | 2.18363  | -2.76982 | 2.87431  |
| H | 0.04554  | -0.99270 | 2.92968  |
| N | 3.09927  | -0.65901 | 2.82025  |
| C | 4.44029  | -1.00578 | 3.23241  |
| H | 4.43576  | -2.05898 | 3.53749  |
| H | 5.14581  | -0.86373 | 2.40147  |
| H | 4.75307  | -0.36790 | 4.06969  |
| H | 1.92159  | -1.98278 | -0.73246 |
| H | 2.64817  | 0.47040  | -0.95929 |

Electronic energy (a.u.) at  $\omega$ B97xd/def2-SVP: -2167.8709638

Gibbs free energy correction (a.u.) at  $\omega$ B97X-D/def2-SVP: 0.230601

Electronic energy (a.u.) at  $\omega$ B97X-D/def2-TZVPP: -2169.2541557

Electronic energy (a.u.) at DLPNO-CCSD(T)/def2-TZVPP: -2166.68798

Number of imaginary frequencies: 0

**16 + NMN (Product - endo)**

|   |          |          |          |
|---|----------|----------|----------|
| C | -0.03732 | -1.51568 | -2.49884 |
| C | 0.69023  | 0.95091  | -2.67683 |
| C | -1.78169 | 0.29864  | -3.15178 |
| O | 0.33903  | -2.51254 | -2.93415 |
| O | 1.52811  | 1.51876  | -3.22489 |
| O | -2.52759 | 0.45639  | -4.01273 |

|    |          |          |          |
|----|----------|----------|----------|
| Cr | -0.61829 | 0.05721  | -1.74333 |
| C  | 2.31334  | -1.38685 | -0.10188 |
| C  | 1.07297  | -1.61283 | 0.73560  |
| C  | -0.03672 | -0.70815 | 0.23300  |
| C  | 0.36114  | 0.63924  | 0.13625  |
| C  | 1.80188  | 0.85718  | 0.55954  |
| C  | 2.69029  | -0.11026 | -0.19255 |
| H  | -1.68482 | -2.12328 | 0.04457  |
| H  | 0.75809  | -2.66150 | 0.78712  |
| C  | -1.38469 | -1.07649 | -0.01016 |
| C  | -0.58151 | 1.64214  | -0.20606 |
| H  | 2.10602  | 1.90571  | 0.46179  |
| C  | -1.91532 | 1.27706  | -0.45268 |
| C  | -2.31754 | -0.08413 | -0.35433 |
| H  | -0.26535 | 2.68125  | -0.30144 |
| H  | -2.63774 | 2.03502  | -0.75552 |
| H  | -3.34626 | -0.36302 | -0.58266 |
| C  | 0.18374  | -1.04983 | 3.06192  |
| C  | 1.40956  | -1.06551 | 2.16143  |
| C  | 1.84270  | 0.40637  | 2.05677  |
| C  | 0.83839  | 1.17496  | 2.90249  |
| H  | 2.17578  | -1.70510 | 2.62026  |
| O  | -0.49821 | -1.98901 | 3.38062  |
| O  | 0.79136  | 2.36663  | 3.06444  |
| H  | 2.84928  | 0.58575  | 2.45850  |
| N  | -0.05838 | 0.26204  | 3.44255  |
| C  | -1.19660 | 0.64191  | 4.24757  |
| H  | -1.10092 | 1.70851  | 4.48287  |
| H  | -2.13065 | 0.46687  | 3.69453  |
| H  | -1.21936 | 0.04818  | 5.17082  |
| H  | 2.82428  | -2.21688 | -0.59083 |
| H  | 3.54959  | 0.23983  | -0.76538 |

Electronic energy (a.u.) at  $\omega$ B97xd/def2-SVP: -2167.873368

Gibbs free energy correction (a.u.) at  $\omega$ B97X-D/def2-SVP: 0.229823

Electronic energy (a.u.) at  $\omega$ B97X-D/def2-TZVPP: -2169.2559308

Electronic energy (a.u.) at DLPNO-CCSD(T)/def2-TZVPP: -2166.687983

Number of imaginary frequencies: 0

**14 + bis(trifluoromethyl)tetrazine (reactants)**

|    |         |          |          |
|----|---------|----------|----------|
| Ir | 2.10642 | -0.03981 | -0.07269 |
| C  | 0.37974 | -1.24287 | 0.34946  |
| H  | 0.50483 | -2.32544 | 0.44113  |
| C  | 0.33566 | -0.71178 | -1.00909 |
| H  | 0.31452 | -1.32613 | -1.91026 |

|   |          |          |          |
|---|----------|----------|----------|
| C | 0.38815  | 0.71041  | -1.04799 |
| H | 0.41072  | 1.27401  | -1.98191 |
| C | 0.47489  | 1.31107  | 0.27832  |
| H | 0.68063  | 2.38440  | 0.30964  |
| C | -0.43303 | 0.76543  | 1.32539  |
| C | -0.48367 | -0.57389 | 1.36261  |
| C | 3.87952  | -1.23572 | 0.50644  |
| C | 4.12223  | -0.86145 | -0.85420 |
| C | 4.17798  | 0.55366  | -0.91389 |
| C | 3.96849  | 1.05863  | 0.40931  |
| C | 3.83349  | -0.04957 | 1.30953  |
| H | 4.33526  | 1.15472  | -1.80716 |
| H | 4.22923  | -1.54604 | -1.69315 |
| H | 3.80132  | -2.25604 | 0.87794  |
| H | 3.73961  | -0.00049 | 2.39157  |
| H | 3.97244  | 2.10938  | 0.69408  |
| H | -1.01384 | 1.42405  | 1.97479  |
| H | -1.11292 | -1.15202 | 2.04233  |
| C | -3.11192 | -1.20824 | -0.15672 |
| C | -3.18574 | 1.28648  | 0.02223  |
| N | -3.79005 | 0.59772  | 0.98829  |
| N | -3.74830 | -0.69900 | 0.89614  |
| N | -2.74889 | 0.78010  | -1.12423 |
| N | -2.71189 | -0.52009 | -1.21856 |
| C | -2.95928 | -2.72470 | -0.19328 |
| C | -3.12432 | 2.80136  | 0.18078  |
| F | -2.56546 | -3.17604 | 0.99213  |
| F | -2.06777 | -3.09057 | -1.10076 |
| F | -4.12372 | -3.29389 | -0.49099 |
| F | -4.24152 | 3.35442  | -0.28366 |
| F | -2.99425 | 3.13171  | 1.45888  |
| F | -2.09766 | 3.30041  | -0.49162 |

Electronic energy (a.u.) at  $\omega$ B97X-D/def2-SVP: -1499.1260436

Gibbs free energy correction (a.u.) at  $\omega$ B97X-D/def2-SVP: 0.195593

Electronic energy (a.u.) at  $\omega$ B97X-D/def2-TZVPP: -1500.7401911

Electronic energy (a.u.) at DLPNO-CCSD(T)/def2-TZVPP: -1498.24023

Number of imaginary frequencies: 0

**14 + bis(trifluoromethyl)tetrazine (Transition state)**

|    |         |          |          |
|----|---------|----------|----------|
| Ir | 1.81212 | -0.06173 | -0.26200 |
| C  | 0.07709 | -1.33014 | -0.15922 |
| H  | 0.21304 | -2.41165 | -0.09839 |
| C  | 0.20523 | -0.73112 | -1.47444 |
| H  | 0.32052 | -1.30434 | -2.39492 |
| C  | 0.22224 | 0.68982  | -1.44847 |

|   |          |          |          |
|---|----------|----------|----------|
| H | 0.35163  | 1.29336  | -2.34744 |
| C | 0.10791  | 1.24327  | -0.11218 |
| H | 0.26968  | 2.31827  | -0.01194 |
| C | -0.89936 | 0.64412  | 0.80063  |
| C | -0.91595 | -0.74081 | 0.77531  |
| C | 3.53074  | -1.24565 | 0.47529  |
| C | 3.92024  | -0.78650 | -0.82304 |
| C | 3.93723  | 0.63259  | -0.79688 |
| C | 3.55828  | 1.05277  | 0.51767  |
| C | 3.34777  | -0.10946 | 1.33066  |
| H | 4.18356  | 1.28905  | -1.62891 |
| H | 4.15115  | -1.41755 | -1.67881 |
| H | 3.44000  | -2.28773 | 0.77706  |
| H | 3.12613  | -0.12643 | 2.39492  |
| H | 3.49235  | 2.08490  | 0.85768  |
| H | -1.24633 | 1.20399  | 1.66785  |
| H | -1.27659 | -1.32351 | 1.62165  |
| C | -2.97032 | -1.23148 | -0.11063 |
| C | -2.94105 | 1.21585  | -0.06590 |
| N | -3.71786 | 0.62151  | 0.88333  |
| N | -3.73311 | -0.65381 | 0.86002  |
| N | -2.82231 | 0.65284  | -1.29488 |
| N | -2.83762 | -0.62694 | -1.31827 |
| C | -2.97592 | -2.75151 | -0.12222 |
| C | -2.91028 | 2.73500  | -0.02194 |
| F | -2.64317 | -3.23889 | 1.07410  |
| F | -2.11418 | -3.22827 | -1.01559 |
| F | -4.18356 | -3.21577 | -0.42820 |
| F | -4.10634 | 3.23889  | -0.31019 |
| F | -2.56645 | 3.17023  | 1.19123  |
| F | -2.03701 | 3.22333  | -0.89770 |

Electronic energy (a.u.) at  $\omega$ B97X-D/def2-SVP: -1500.7211488

Gibbs free energy correction (a.u.) at  $\omega$ B97X-D/def2-SVP: 0.199907

Electronic energy (a.u.) at  $\omega$ B97X-D/def2-TZVPP: -1500.7211488

Electronic energy (a.u.) at DLPNO-CCSD(T)/def2-TZVPP: -1498.226893

Number of imaginary frequencies: 1

**14 + bis(trifluoromethyl)tetrazine (Product)**

|    |         |          |          |
|----|---------|----------|----------|
| Ir | 1.87868 | -0.02030 | -0.14276 |
| C  | 0.17301 | -1.28094 | -0.24233 |
| H  | 0.33641 | -2.35931 | -0.16857 |
| C  | 0.42329 | -0.69003 | -1.53613 |
| H  | 0.66271 | -1.26135 | -2.43411 |
| C  | 0.44074 | 0.73612  | -1.50962 |
| H  | 0.69447 | 1.33440  | -2.38586 |

|   |          |          |          |
|---|----------|----------|----------|
| C | 0.20439  | 1.28449  | -0.19464 |
| H | 0.39408  | 2.35506  | -0.08093 |
| C | -0.94268 | 0.76544  | 0.65749  |
| C | -0.96141 | -0.76602 | 0.62903  |
| C | 3.50101  | -1.21017 | 0.79690  |
| C | 4.02341  | -0.75305 | -0.45105 |
| C | 4.04087  | 0.67054  | -0.42471 |
| C | 3.52926  | 1.09387  | 0.83952  |
| C | 3.21547  | -0.06929 | 1.61856  |
| H | 4.38326  | 1.32350  | -1.22493 |
| H | 4.35005  | -1.38417 | -1.27502 |
| H | 3.37699  | -2.25098 | 1.09064  |
| H | 2.87462  | -0.08421 | 2.65106  |
| H | 3.43067  | 2.12583  | 1.17161  |
| H | -0.81499 | 1.13191  | 1.68425  |
| H | -0.84319 | -1.17339 | 1.64140  |
| C | -2.39740 | -1.17843 | 0.16883  |
| C | -2.36794 | 1.22967  | 0.21359  |
| N | -3.29837 | 0.63334  | 1.18763  |
| N | -3.31341 | -0.59613 | 1.16477  |
| N | -2.63969 | 0.66941  | -1.11006 |
| N | -2.65476 | -0.56290 | -1.13297 |
| C | -2.65323 | -2.68158 | 0.08377  |
| C | -2.58689 | 2.74074  | 0.18456  |
| F | -2.29055 | -3.27769 | 1.22116  |
| F | -1.95464 | -3.23269 | -0.90726 |
| F | -3.93745 | -2.93474 | -0.12887 |
| F | -3.86444 | 3.03295  | -0.01795 |
| F | -2.21026 | 3.28513  | 1.34315  |
| F | -1.87459 | 3.31105  | -0.78563 |

Electronic energy (a.u.) at  $\omega$ B97X-D/def2-SVP: -1499.1815294

Gibbs free energy correction (a.u.) at  $\omega$ B97X-D/def2-SVP: 0.203996

Electronic energy (a.u.) at  $\omega$ B97X-D/def2-TZVPP: -1500.7898469

Electronic energy (a.u.) at DLPNO-CCSD(T)/def2-TZVPP: -1498.29743

Number of imaginary frequencies: 0

**14 + Cyclopentadiene (reactants - exo)**

|    |          |          |          |
|----|----------|----------|----------|
| Ir | 1.02740  | 0.03170  | -0.07531 |
| C  | -0.91976 | -0.73118 | 0.40283  |
| H  | -1.01100 | -1.78504 | 0.68148  |
| C  | -0.79489 | -0.45536 | -1.02344 |
| H  | -0.87956 | -1.20952 | -1.80839 |
| C  | -0.46031 | 0.90390  | -1.29524 |
| H  | -0.26604 | 1.27295  | -2.30429 |
| C  | -0.31897 | 1.70108  | -0.08078 |



|   |          |          |          |
|---|----------|----------|----------|
| H | 0.10402  | 2.70213  | -0.20877 |
| C | -1.36838 | 1.52971  | 0.96398  |
| C | -1.68293 | 0.25562  | 1.21679  |
| C | 2.49963  | -1.36370 | 0.82546  |
| C | 2.89981  | -1.26258 | -0.54534 |
| C | 3.23200  | 0.09050  | -0.80383 |
| C | 3.04046  | 0.83059  | 0.40694  |
| C | 2.63496  | -0.07584 | 1.44093  |
| H | 3.56040  | 0.50204  | -1.75609 |
| H | 2.92465  | -2.08003 | -1.26309 |
| H | 2.20256  | -2.27997 | 1.33273  |
| H | 2.48288  | 0.16185  | 2.49090  |
| H | 3.23238  | 1.89436  | 0.53622  |
| H | -1.87895 | 2.39028  | 1.40142  |
| H | -2.49188 | -0.06293 | 1.87665  |
| C | -4.24897 | -1.08619 | -0.71847 |
| C | -4.36040 | 0.38946  | -0.95234 |
| C | -5.13560 | 0.86937  | 0.23695  |
| C | -5.41966 | -0.17943 | 1.03548  |
| C | -4.86549 | -1.40092 | 0.43878  |
| H | -5.40774 | 1.91082  | 0.40980  |
| H | -5.96874 | -0.14152 | 1.97753  |
| H | -3.73720 | -1.77509 | -1.39064 |
| H | -4.94568 | -2.39772 | 0.87513  |
| H | -4.86705 | 0.62494  | -1.90578 |
| H | -3.36393 | 0.86529  | -1.00010 |

Electronic energy (a.u.) at  $\omega$ B97X-D/def2-SVP: -723.6418022

Gibbs free energy correction (a.u.) at  $\omega$ B97X-D/def2-SVP: 0.234013

Electronic energy (a.u.) at  $\omega$ B97X-D/def2-TZVPP: -724.3260204

Electronic energy (a.u.) at DLPNO-CCSD(T)/def2-TZVPP: -722.7949832

Number of imaginary frequencies: 0

**14 + Cyclopentadiene (reactants - endo)**

|    |          |          |          |
|----|----------|----------|----------|
| Ir | 0.98141  | -0.07821 | 0.05344  |
| C  | -0.69687 | -1.36828 | 0.41708  |
| H  | -0.50777 | -2.43947 | 0.53508  |
| C  | -0.70499 | -0.86460 | -0.94976 |
| H  | -0.63434 | -1.49280 | -1.83981 |
| C  | -0.72887 | 0.55769  | -1.01226 |
| H  | -0.67791 | 1.10688  | -1.95446 |
| C  | -0.73850 | 1.18082  | 0.30457  |
| H  | -0.58634 | 2.26407  | 0.32572  |
| C  | -1.66217 | 0.60276  | 1.32011  |
| C  | -1.64209 | -0.73223 | 1.37752  |
| C  | 2.79597  | -1.16096 | 0.73699  |

|   |          |          |          |
|---|----------|----------|----------|
| C | 3.09259  | -0.78176 | -0.61150 |
| C | 3.06359  | 0.63346  | -0.68245 |
| C | 2.75086  | 1.13383  | 0.62190  |
| C | 2.63476  | 0.02630  | 1.52445  |
| H | 3.23366  | 1.23696  | -1.57176 |
| H | 3.28771  | -1.46399 | -1.43642 |
| H | 2.76164  | -2.18139 | 1.11483  |
| H | 2.47778  | 0.07696  | 2.59907  |
| H | 2.67651  | 2.18481  | 0.89593  |
| H | -2.33986 | 1.23984  | 1.89163  |
| H | -2.30006 | -1.33701 | 2.00518  |
| C | -4.68173 | 1.32424  | -0.18090 |
| C | -5.07578 | 0.01251  | 0.42918  |
| C | -4.56740 | -0.99346 | -0.55928 |
| H | -4.66852 | -2.07252 | -0.44191 |
| H | -3.51731 | -0.81327 | -2.45774 |
| H | -4.88709 | 2.29567  | 0.26953  |
| H | -3.64688 | 1.85750  | -2.02056 |
| H | -6.16912 | -0.06446 | 0.57291  |
| H | -4.62028 | -0.12868 | 1.42514  |
| C | -3.98136 | -0.34823 | -1.58708 |
| C | -4.05076 | 1.09748  | -1.35025 |

Electronic energy (a.u.) at  $\omega$ B97X-D/def2-SVP: -723.6414312

Gibbs free energy correction (a.u.) at  $\omega$ B97X-D/def2-SVP: 0.232666

Electronic energy (a.u.) at  $\omega$ B97X-D/def2-TZVPP: -724.3253272

Electronic energy (a.u.) at DLPNO-CCSD(T)/def2-TZVPP: -722.7945917

Number of imaginary frequencies: 0

#### 14 + Cyclopentadiene (Transition state - exo)

|    |          |          |          |
|----|----------|----------|----------|
| Ir | 0.90102  | -0.01339 | -0.16316 |
| C  | -0.86594 | -1.26380 | -0.13087 |
| H  | -0.72295 | -2.34588 | -0.05302 |
| C  | -0.63875 | -0.68810 | -1.43776 |
| H  | -0.44568 | -1.26919 | -2.34173 |
| C  | -0.61173 | 0.74172  | -1.42488 |
| H  | -0.39666 | 1.33137  | -2.31826 |
| C  | -0.81764 | 1.30171  | -0.10771 |
| H  | -0.63399 | 2.37603  | -0.01019 |
| C  | -1.85042 | 0.72516  | 0.80627  |
| C  | -1.87644 | -0.66540 | 0.79388  |
| C  | 2.56403  | -1.20038 | 0.71614  |
| C  | 3.08673  | -0.75751 | -0.54242 |
| C  | 3.11250  | 0.65697  | -0.52914 |
| C  | 2.60599  | 1.09508  | 0.73767  |
| C  | 2.32234  | -0.05546 | 1.54373  |

|   |          |          |          |
|---|----------|----------|----------|
| H | 3.43751  | 1.30308  | -1.34214 |
| H | 3.38827  | -1.39977 | -1.36743 |
| H | 2.44494  | -2.23875 | 1.02101  |
| H | 2.00823  | -0.05954 | 2.58463  |
| H | 2.52464  | 2.13130  | 1.06167  |
| H | -2.09535 | 1.29427  | 1.69969  |
| H | -2.14259 | -1.24078 | 1.67715  |
| C | -3.95802 | -1.07663 | -0.06971 |
| C | -3.80729 | 0.08208  | -1.00821 |
| C | -3.91483 | 1.22937  | -0.04992 |
| C | -4.68445 | 0.78371  | 1.02607  |
| C | -4.71078 | -0.62100 | 1.01399  |
| H | -3.81041 | 2.27397  | -0.34955 |
| H | -5.08324 | 1.41503  | 1.82165  |
| H | -3.89294 | -2.11909 | -0.38741 |
| H | -5.13328 | -1.25050 | 1.79869  |
| H | -4.70216 | 0.10444  | -1.66269 |
| H | -2.92976 | 0.07125  | -1.66015 |

Electronic energy (a.u.) at  $\omega$ B97X-D/def2-SVP: -723.601218

Gibbs free energy correction (a.u.) at  $\omega$ B97X-D/def2-SVP: 0.240555

Electronic energy (a.u.) at  $\omega$ B97X-D/def2-TZVPP: -724.2805582

Electronic energy (a.u.) at DLPNO-CCSD(T)/def2-TZVPP: -722.7538649

Number of imaginary frequencies: 1

#### 14 + Cyclopentadiene (Transition state - endo)

|    |          |          |          |
|----|----------|----------|----------|
| Ir | 0.88960  | -0.00941 | -0.08577 |
| C  | -0.86402 | -1.26474 | -0.08288 |
| H  | -0.71896 | -2.34803 | -0.02886 |
| C  | -0.65012 | -0.65757 | -1.37781 |
| H  | -0.45890 | -1.21472 | -2.29704 |
| C  | -0.62858 | 0.76839  | -1.33108 |
| H  | -0.41961 | 1.37847  | -2.21204 |
| C  | -0.82535 | 1.29567  | 0.00099  |
| H  | -0.64768 | 2.36821  | 0.12567  |
| C  | -1.87789 | 0.69575  | 0.87330  |
| C  | -1.89882 | -0.69172 | 0.82789  |
| C  | 2.55934  | -1.21227 | 0.75947  |
| C  | 3.06356  | -0.73752 | -0.49407 |
| C  | 3.08516  | 0.67814  | -0.44701 |
| C  | 2.59432  | 1.08373  | 0.83583  |
| C  | 2.31860  | -0.08750 | 1.61479  |
| H  | 3.40273  | 1.34426  | -1.24667 |
| H  | 3.36154  | -1.35840 | -1.33653 |
| H  | 2.44627  | -2.25797 | 1.04057  |
| H  | 2.01287  | -0.11751 | 2.65776  |

|   |          |          |          |
|---|----------|----------|----------|
| H | 2.51272  | 2.11140  | 1.18583  |
| H | -2.18394 | 1.24824  | 1.76133  |
| H | -2.22207 | -1.29160 | 1.67828  |
| C | -3.91150 | 1.21485  | -0.00089 |
| C | -4.49394 | 0.04454  | 0.74423  |
| C | -3.94588 | -1.09153 | -0.07610 |
| H | -4.12179 | -2.14231 | 0.16189  |
| H | -3.49777 | -1.20791 | -2.23620 |
| H | -4.05616 | 2.25267  | 0.30525  |
| H | -3.45793 | 1.45826  | -2.14924 |
| H | -5.59498 | 0.06506  | 0.61797  |
| H | -4.28610 | 0.00631  | 1.82158  |
| C | -3.73609 | -0.60261 | -1.36111 |
| C | -3.71506 | 0.80461  | -1.31521 |

Electronic energy (a.u.) at  $\omega$ B97X-D/def2-SVP: -723.606972

Gibbs free energy correction (a.u.) at  $\omega$ B97X-D/def2-SVP: 0.240525

Electronic energy (a.u.) at  $\omega$ B97X-D/def2-TZVPP: -724.2859888

Electronic energy (a.u.) at DLPNO-CCSD(T)/def2-TZVPP: -722.7599371

Number of imaginary frequencies: 1

**14 + Cyclopentadiene (Product - exo)**

|    |          |          |          |
|----|----------|----------|----------|
| Ir | 0.87374  | -0.01636 | -0.15376 |
| C  | -0.85884 | -1.26685 | -0.27317 |
| H  | -0.69623 | -2.34829 | -0.19520 |
| C  | -0.55392 | -0.69086 | -1.56017 |
| H  | -0.27872 | -1.26926 | -2.44461 |
| C  | -0.52579 | 0.74006  | -1.54676 |
| H  | -0.22767 | 1.32364  | -2.42031 |
| C  | -0.80832 | 1.30341  | -0.24912 |
| H  | -0.60329 | 2.37597  | -0.15099 |
| C  | -1.95991 | 0.80707  | 0.60998  |
| C  | -1.99038 | -0.74176 | 0.59546  |
| C  | 2.45399  | -1.20906 | 0.85943  |
| C  | 3.04170  | -0.76688 | -0.36624 |
| C  | 3.06891  | 0.65468  | -0.35126 |
| C  | 2.49827  | 1.09315  | 0.88379  |
| C  | 2.14578  | -0.05989 | 1.66031  |
| H  | 3.45296  | 1.29842  | -1.14000 |
| H  | 3.40105  | -1.40809 | -1.16857 |
| H  | 2.31051  | -2.24632 | 1.15680  |
| H  | 1.75757  | -0.06315 | 2.67596  |
| H  | 2.39454  | 2.12868  | 1.20296  |
| H  | -1.79966 | 1.19195  | 1.62764  |
| H  | -1.84582 | -1.15165 | 1.60567  |
| C  | -3.44364 | -1.05591 | 0.10514  |

|   |          |          |          |
|---|----------|----------|----------|
| C | -3.68402 | 0.08045  | -0.90559 |
| C | -3.39952 | 1.18729  | 0.12623  |
| C | -4.32855 | 0.74221  | 1.24685  |
| C | -4.35487 | -0.59577 | 1.23426  |
| H | -3.50337 | 2.22860  | -0.20753 |
| H | -4.78825 | 1.40502  | 1.98182  |
| H | -3.58824 | -2.08588 | -0.24808 |
| H | -4.84055 | -1.25369 | 1.95682  |
| H | -4.71990 | 0.10428  | -1.27360 |
| H | -2.99666 | 0.07498  | -1.76092 |

Electronic energy (a.u.) at  $\omega$ B97X-D/def2-SVP: -723.6924242

Gibbs free energy correction (a.u.) at  $\omega$ B97X-D/def2-SVP: 0.247447

Electronic energy (a.u.) at  $\omega$ B97X-D/def2-TZVPP: -724.3678392

Electronic energy (a.u.) at DLPNO-CCSD(T)/def2-TZVPP: -722.838857

Number of imaginary frequencies: 0

#### 14 + Cyclopentadiene (Product - endo)

|    |          |          |          |
|----|----------|----------|----------|
| Ir | 0.84884  | -0.01206 | -0.05475 |
| C  | -0.87964 | -1.27106 | -0.21094 |
| H  | -0.70965 | -2.35297 | -0.16019 |
| C  | -0.57720 | -0.65695 | -1.47970 |
| H  | -0.29912 | -1.20967 | -2.37951 |
| C  | -0.55437 | 0.77157  | -1.43202 |
| H  | -0.25782 | 1.37388  | -2.29328 |
| C  | -0.83840 | 1.30908  | -0.12483 |
| H  | -0.63401 | 2.37923  | -0.00224 |
| C  | -1.98772 | 0.78199  | 0.71310  |
| C  | -2.01244 | -0.76457 | 0.66148  |
| C  | 2.43179  | -1.22213 | 0.92932  |
| C  | 3.01415  | -0.75015 | -0.28831 |
| C  | 3.03681  | 0.67062  | -0.24079 |
| C  | 2.46849  | 1.07851  | 1.00627  |
| C  | 2.12424  | -0.09304 | 1.75822  |
| H  | 3.41707  | 1.33372  | -1.01519 |
| H  | 3.37392  | -1.37180 | -1.10569 |
| H  | 2.29287  | -2.26651 | 1.20307  |
| H  | 1.73953  | -0.12091 | 2.77483  |
| H  | 2.36262  | 2.10617  | 1.34934  |
| H  | -1.82845 | 1.12395  | 1.74734  |
| H  | -1.86525 | -1.17961 | 1.67046  |
| C  | -3.45031 | 1.16952  | 0.29863  |
| C  | -4.22144 | 0.03374  | 1.00134  |
| C  | -3.48621 | -1.07672 | 0.22368  |
| H  | -3.79864 | -2.11262 | 0.41162  |
| H  | -3.68894 | -1.19701 | -2.08750 |

|   |          |          |          |
|---|----------|----------|----------|
| H | -3.72971 | 2.20003  | 0.55552  |
| H | -3.64663 | 1.44998  | -1.99918 |
| H | -5.30321 | 0.05764  | 0.80308  |
| H | -4.04603 | -0.00535 | 2.08857  |
| C | -3.66883 | -0.57147 | -1.19406 |
| C | -3.64745 | 0.76595  | -1.14943 |

Electronic energy (a.u.) at  $\omega$ B97X-D/def2-SVP: -723.692282

Gibbs free energy correction (a.u.) at  $\omega$ B97X-D/def2-SVP: 0.247757

Electronic energy (a.u.) at  $\omega$ B97X-D/def2-TZVPP: -724.3667088

Electronic energy (a.u.) at DLPNO-CCSD(T)/def2-TZVPP: -722.8378096

Number of imaginary frequencies: 0

### 11 + Cyclopentadiene (Reactants - endo)

|    |          |          |          |
|----|----------|----------|----------|
| Fe | 1.51066  | 0.03932  | 0.13298  |
| C  | 2.67973  | -1.21656 | -0.39117 |
| C  | 1.74477  | 0.02226  | 1.91089  |
| C  | 2.60865  | 1.37088  | -0.35696 |
| C  | 0.00221  | -0.69093 | -1.04155 |
| C  | -0.03645 | 0.71648  | -1.02291 |
| C  | -0.20974 | 1.29181  | 0.28192  |
| C  | -1.16746 | 0.62132  | 1.19362  |
| C  | -1.13069 | -0.71668 | 1.17590  |
| C  | -0.13825 | -1.30921 | 0.24749  |
| H  | 0.20424  | -1.24975 | -1.95736 |
| H  | 0.13394  | 1.30958  | -1.92347 |
| H  | -0.10298 | 2.37620  | 0.36697  |
| H  | -1.86568 | 1.20873  | 1.79215  |
| H  | -1.79516 | -1.35716 | 1.75820  |
| H  | 0.02794  | -2.38797 | 0.30391  |
| O  | 1.87299  | 0.01082  | 3.04473  |
| O  | 3.38170  | -2.06105 | -0.70713 |
| O  | 3.26298  | 2.26068  | -0.64999 |
| C  | -4.02730 | 1.07537  | -0.65072 |
| C  | -4.50745 | -0.12515 | 0.10825  |
| C  | -3.96197 | -1.27477 | -0.68462 |
| C  | -3.28832 | -0.79804 | -1.75052 |
| C  | -3.32905 | 0.66770  | -1.72937 |
| H  | -4.10976 | -2.32312 | -0.42445 |
| H  | -2.78588 | -1.39501 | -2.51287 |
| H  | -4.23290 | 2.10595  | -0.36057 |
| H  | -2.86115 | 1.31339  | -2.47379 |
| H  | -5.61096 | -0.15668 | 0.16779  |
| H  | -4.14271 | -0.13004 | 1.15033  |

Electronic energy (a.u.) at  $\omega$ B97X-D/def2-SVP: -2029.1206179  
Gibbs free energy correction (a.u.) at  $\omega$ B97X-D/def2-SVP: 0.173701  
Electronic energy (a.u.) at  $\omega$ B97X-D/def2-TZVPP: -2030.1451964  
Electronic energy (a.u.) at DLPNO-CCSD(T)/def2-TZVPP: -2028.08410  
Number of imaginary frequencies: 0

### 11 + Cyclopentadiene (Reactants - exo)

|    |          |          |          |
|----|----------|----------|----------|
| Fe | 1.60238  | 0.03890  | 0.01365  |
| C  | 3.00639  | -0.86520 | -0.64432 |
| C  | 1.80079  | -0.23383 | 1.77553  |
| C  | 2.42958  | 1.61801  | -0.19468 |
| C  | 0.28844  | -0.75171 | -1.34034 |
| C  | -0.02616 | 0.59931  | -1.09193 |
| C  | -0.33110 | 0.89950  | 0.28022  |
| C  | -1.15764 | -0.08551 | 1.01802  |
| C  | -0.86044 | -1.36952 | 0.78338  |
| C  | 0.24786  | -1.59688 | -0.17674 |
| H  | 0.61436  | -1.09623 | -2.32379 |
| H  | 0.04111  | 1.35947  | -1.87275 |
| H  | -0.44465 | 1.95344  | 0.54535  |
| H  | -1.98342 | 0.24617  | 1.64888  |
| H  | -1.40702 | -2.21079 | 1.21316  |
| H  | 0.62322  | -2.61742 | -0.28839 |
| O  | 1.90717  | -0.41271 | 2.89717  |
| O  | 3.86647  | -1.49510 | -1.05504 |
| O  | 2.90338  | 2.65173  | -0.30458 |
| C  | -4.52788 | -0.58376 | -0.18969 |
| C  | -3.67352 | -0.15487 | -1.34409 |
| C  | -3.51772 | 1.31981  | -1.12834 |
| C  | -4.18380 | 1.67861  | -0.01204 |
| C  | -4.81535 | 0.48982  | 0.57388  |
| H  | -2.94894 | 1.97801  | -1.78551 |
| H  | -4.25250 | 2.68621  | 0.40079  |
| H  | -4.84953 | -1.61074 | -0.01544 |
| H  | -5.41729 | 0.49048  | 1.48379  |
| H  | -4.14195 | -0.38601 | -2.31797 |
| H  | -2.69648 | -0.67171 | -1.33599 |

Electronic energy (a.u.) at  $\omega$ B97X-D/def2-SVP: -2029.1206202  
Gibbs free energy correction (a.u.) at  $\omega$ B97X-D/def2-SVP: 0.172961  
Electronic energy (a.u.) at  $\omega$ B97X-D/def2-TZVPP: -2030.1454897  
Electronic energy (a.u.) at DLPNO-CCSD(T)/def2-TZVPP: -2028.08391  
Number of imaginary frequencies: 0

### 11 + Cyclopentadiene (Transition state - endo)

|    |          |          |          |
|----|----------|----------|----------|
| Fe | 1.43600  | 0.00803  | -0.03540 |
| C  | 2.66368  | -1.24817 | -0.38304 |
| C  | 1.38574  | -0.01726 | 1.75599  |
| C  | 2.59296  | 1.33834  | -0.34864 |
| C  | 0.12698  | -0.71471 | -1.43414 |
| C  | 0.08794  | 0.69596  | -1.41524 |
| C  | -0.29944 | 1.26997  | -0.16679 |
| C  | -1.37622 | 0.61931  | 0.61831  |
| C  | -1.33833 | -0.77320 | 0.59918  |
| C  | -0.22784 | -1.34259 | -0.20200 |
| H  | 0.48109  | -1.26539 | -2.30759 |
| H  | 0.41090  | 1.28854  | -2.27320 |
| H  | -0.19738 | 2.35348  | -0.06281 |
| H  | -1.76815 | 1.15850  | 1.48066  |
| H  | -1.70024 | -1.35634 | 1.44591  |
| H  | -0.06666 | -2.42132 | -0.12723 |
| O  | 1.33477  | -0.03389 | 2.89767  |
| O  | 3.40763  | -2.09158 | -0.59135 |
| O  | 3.28944  | 2.22648  | -0.53380 |
| C  | -3.34989 | 1.03792  | -0.42117 |
| C  | -3.94194 | -0.14290 | 0.29829  |
| C  | -3.28744 | -1.26902 | -0.45421 |
| C  | -2.99133 | -0.79233 | -1.72726 |
| C  | -3.02951 | 0.61471  | -1.70714 |
| H  | -3.44020 | -2.32202 | -0.21050 |
| H  | -2.66184 | -1.40192 | -2.56928 |
| H  | -3.55939 | 2.07369  | -0.14761 |
| H  | -2.73423 | 1.26508  | -2.53114 |
| H  | -5.02895 | -0.16926 | 0.08497  |
| H  | -3.82108 | -0.15522 | 1.38937  |

Electronic energy (a.u.) at  $\omega$ B97X-D/def2-SVP: -2029.0877115

Gibbs free energy correction (a.u.) at  $\omega$ B97X-D/def2-SVP: 0.180602

Electronic energy (a.u.) at  $\omega$ B97X-D/def2-TZVPP: -2030.107906

Electronic energy (a.u.) at DLPNO-CCSD(T)/def2-TZVPP: -2028.05152

Number of imaginary frequencies: 1

### 11 + Cyclopentadiene (Transition state - exo)

|    |         |          |          |
|----|---------|----------|----------|
| Fe | 1.41383 | -0.01879 | -0.02797 |
| C  | 2.53650 | -1.37534 | -0.35278 |
| C  | 1.35314 | -0.01599 | 1.76631  |
| C  | 2.68672 | 1.19819  | -0.35173 |



|   |          |          |          |
|---|----------|----------|----------|
| C | 0.05187  | -0.64708 | -1.42201 |
| C | 0.13429  | 0.76487  | -1.42140 |
| C | -0.22720 | 1.39054  | -0.19240 |
| C | -1.33671 | 0.84095  | 0.62443  |
| C | -1.41809 | -0.55324 | 0.62385  |
| C | -0.38003 | -1.22749 | -0.19351 |
| H | 0.37076  | -1.23846 | -2.28233 |
| H | 0.51986  | 1.31586  | -2.28123 |
| H | -0.03125 | 2.46237  | -0.10287 |
| H | -1.62972 | 1.41441  | 1.50095  |
| H | -1.77584 | -1.08945 | 1.49991  |
| H | -0.31010 | -2.31492 | -0.10491 |
| O | 1.30807  | -0.01382 | 2.90804  |
| O | 3.20585  | -2.28222 | -0.54643 |
| O | 3.45705  | 2.02119  | -0.54468 |
| C | -3.42413 | -0.89138 | -0.41417 |
| C | -3.14282 | 0.24768  | -1.34632 |
| C | -3.28971 | 1.41102  | -0.41329 |
| C | -4.16473 | 1.01001  | 0.59805  |
| C | -4.24658 | -0.39204 | 0.59752  |
| H | -3.11951 | 2.44696  | -0.71265 |
| H | -4.60557 | 1.66747  | 1.34877  |
| H | -3.37562 | -1.93985 | -0.71433 |
| H | -4.76096 | -0.99431 | 1.34775  |
| H | -3.97129 | 0.29633  | -2.08111 |
| H | -2.21056 | 0.19347  | -1.91654 |

Electronic energy (a.u.) at  $\omega$ B97X-D/def2-SVP: -2029.0823695

Gibbs free energy correction (a.u.) at  $\omega$ B97X-D/def2-SVP: 0.180613

Electronic energy (a.u.) at  $\omega$ B97X-D/def2-TZVPP: -2030.103064

Electronic energy (a.u.) at DLPNO-CCSD(T)/def2-TZVPP: -2028.04590

Number of imaginary frequencies: 1

### 11 + Cyclopentadiene (Product - endo)

|    |          |          |          |
|----|----------|----------|----------|
| Fe | 1.22130  | 0.03210  | 0.08185  |
| C  | 2.46641  | -1.23888 | -0.13889 |
| C  | 1.01071  | 0.00208  | 1.84808  |
| C  | 2.39535  | 1.37442  | -0.10302 |
| C  | 0.06682  | -0.68570 | -1.44062 |
| C  | 0.02832  | 0.72783  | -1.42105 |
| C  | -0.43752 | 1.30194  | -0.20031 |
| C  | -1.63570 | 0.72407  | 0.52255  |
| C  | -1.59347 | -0.82625 | 0.50111  |
| C  | -0.36617 | -1.31784 | -0.23657 |
| H  | 0.50025  | -1.23109 | -2.28168 |

|   |          |          |          |
|---|----------|----------|----------|
| H | 0.43078  | 1.31907  | -2.24637 |
| H | -0.30741 | 2.38430  | -0.09271 |
| H | -1.61803 | 1.08880  | 1.56096  |
| H | -1.55519 | -1.21804 | 1.52905  |
| H | -0.17727 | -2.39408 | -0.15885 |
| O | 0.83434  | -0.01825 | 2.97788  |
| O | 3.22847  | -2.07911 | -0.27563 |
| O | 3.11051  | 2.25826  | -0.21620 |
| C | -3.05966 | 1.04135  | -0.05949 |
| C | -3.85553 | -0.11308 | 0.58128  |
| C | -2.99849 | -1.20436 | -0.09055 |
| C | -3.04599 | -0.73128 | -1.52964 |
| C | -3.08245 | 0.60634  | -1.51114 |
| H | -3.28608 | -2.24919 | 0.08564  |
| H | -2.95000 | -1.37274 | -2.40669 |
| H | -3.40356 | 2.06372  | 0.14528  |
| H | -3.02220 | 1.27606  | -2.37006 |
| H | -4.90887 | -0.13743 | 0.26694  |
| H | -3.79807 | -0.12673 | 1.68144  |

Electronic energy (a.u.) at  $\omega$ B97X-D/def2-SVP: -2029.1696805

Gibbs free energy correction (a.u.) at  $\omega$ B97X-D/def2-SVP: 0.188374

Electronic energy (a.u.) at  $\omega$ B97X-D/def2-TZVPP: -2030.1844256

Electronic energy (a.u.) at DLPNO-CCSD(T)/def2-TZVPP: -2028.12709

Number of imaginary frequencies: 0

### 11 + Cyclopentadiene (Product - exo)

|    |          |          |          |
|----|----------|----------|----------|
| Fe | 1.26782  | -0.07409 | -0.03951 |
| C  | 2.40195  | -1.44997 | -0.23173 |
| C  | 1.04548  | -0.06193 | 1.72596  |
| C  | 2.55443  | 1.16057  | -0.23050 |
| C  | 0.06480  | -0.71206 | -1.55918 |
| C  | 0.14734  | 0.70099  | -1.55853 |
| C  | -0.27627 | 1.32385  | -0.34560 |
| C  | -1.52436 | 0.86649  | 0.38570  |
| C  | -1.61490 | -0.68357 | 0.38498  |
| C  | -0.42851 | -1.28246 | -0.34680 |
| H  | 0.45473  | -1.30701 | -2.38788 |
| H  | 0.60393  | 1.24726  | -2.38671 |
| H  | -0.05865 | 2.39328  | -0.25101 |
| H  | -1.47968 | 1.26051  | 1.41132  |
| H  | -1.61647 | -1.08106 | 1.41023  |
| H  | -0.33690 | -2.37005 | -0.25320 |
| O  | 0.86542  | -0.05194 | 2.85482  |
| O  | 3.09038  | -2.35376 | -0.35062 |

|   |          |          |          |
|---|----------|----------|----------|
| O | 3.34340  | 1.97819  | -0.34858 |
| C | -3.01551 | -0.94693 | -0.26847 |
| C | -3.09286 | 0.18122  | -1.31257 |
| C | -2.88473 | 1.29174  | -0.26743 |
| C | -3.95016 | 0.90055  | 0.74587  |
| C | -4.02820 | -0.43529 | 0.74525  |
| H | -2.90727 | 2.33126  | -0.62085 |
| H | -4.46224 | 1.59239  | 1.41637  |
| H | -3.15890 | -1.97643 | -0.62285 |
| H | -4.61738 | -1.06342 | 1.41514  |
| H | -4.07782 | 0.23898  | -1.79717 |
| H | -2.31387 | 0.13608  | -2.08438 |

Electronic energy (a.u.) at  $\omega$ B97X-D/def2-SVP: -2029.1695234

Gibbs free energy correction (a.u.) at  $\omega$ B97X-D/def2-SVP: 0.188225

Electronic energy (a.u.) at  $\omega$ B97X-D/def2-TZVPP: -2030.1851623

Electronic energy (a.u.) at DLPNO-CCSD(T)/def2-TZVPP: -2028.12794

Number of imaginary frequencies: 0

### 11 + bis(trifluoromethyl)tetrazine (Reactants)

|    |          |          |          |
|----|----------|----------|----------|
| C  | -2.54903 | -1.10008 | -0.45589 |
| C  | -2.40697 | 1.39864  | -0.40265 |
| N  | -3.17933 | 0.82036  | 0.51552  |
| N  | -3.25314 | -0.47754 | 0.48785  |
| N  | -1.88071 | 0.79079  | -1.45815 |
| N  | -1.95474 | -0.51149 | -1.48589 |
| C  | -2.54043 | -2.62433 | -0.41434 |
| C  | -2.22585 | 2.90894  | -0.29629 |
| F  | -2.44396 | -3.05097 | 0.83877  |
| F  | -1.51762 | -3.10707 | -1.10409 |
| F  | -3.66572 | -3.10218 | -0.93533 |
| F  | -3.28923 | 3.53291  | -0.79219 |
| F  | -2.08304 | 3.26796  | 0.97349  |
| F  | -1.15421 | 3.30188  | -0.96870 |
| Fe | 2.68461  | -0.15582 | 0.19490  |
| C  | 3.74385  | -1.50009 | -0.35515 |
| C  | 2.94780  | -0.20960 | 1.97030  |
| C  | 3.88935  | 1.08385  | -0.29845 |
| C  | 1.11465  | -0.74664 | -0.97564 |
| C  | 1.19377  | 0.65801  | -0.94484 |
| C  | 1.08306  | 1.23569  | 0.36863  |
| C  | 0.07944  | 0.63994  | 1.28224  |
| C  | 0.00392  | -0.70097 | 1.25283  |
| C  | 0.93659  | -1.36508 | 0.31160  |

|   |          |          |          |
|---|----------|----------|----------|
| H | 1.24329  | -1.31234 | -1.89971 |
| H | 1.38733  | 1.24553  | -1.84363 |
| H | 1.27367  | 2.30748  | 0.46023  |
| H | -0.53808 | 1.27250  | 1.92279  |
| H | -0.68226 | -1.28759 | 1.86668  |
| H | 1.00550  | -2.45447 | 0.35581  |
| O | 3.09064  | -0.24246 | 3.10106  |
| O | 4.37185  | -2.39324 | -0.68749 |
| O | 4.61441  | 1.91457  | -0.59298 |

Electronic energy (a.u.) at  $\omega$ B97X-D/def2-SVP: -2804.6034195

Gibbs free energy correction (a.u.) at  $\omega$ B97X-D/def2-SVP: 0.135962

Electronic energy (a.u.) at  $\omega$ B97X-D/def2-TZVPP: -2806.5581202

Electronic energy (a.u.) at DLPNO-CCSD(T)/def2-TZVPP: -2803.52767

Number of imaginary frequencies: 0

### **11 + bis(trifluoromethyl)tetrazine (Transition state)**

|    |          |          |          |
|----|----------|----------|----------|
| C  | -2.74514 | -1.23686 | -0.74535 |
| C  | -2.60681 | 1.20681  | -0.69289 |
| N  | -3.50917 | 0.65161  | 0.16645  |
| N  | -3.58119 | -0.62070 | 0.13913  |
| N  | -2.38363 | 0.63478  | -1.90436 |
| N  | -2.45592 | -0.64235 | -1.93178 |
| C  | -2.82791 | -2.75553 | -0.76303 |
| C  | -2.51771 | 2.72448  | -0.64537 |
| F  | -2.63642 | -3.25624 | 0.45808  |
| F  | -1.90755 | -3.27516 | -1.57055 |
| F  | -4.02112 | -3.15643 | -1.18642 |
| F  | -3.65705 | 3.27516  | -1.04835 |
| F  | -2.27395 | 3.14768  | 0.59557  |
| F  | -1.54265 | 3.17105  | -1.43213 |
| Fe | 1.98604  | -0.28755 | -0.32504 |
| C  | 3.10841  | -1.64291 | -0.71189 |
| C  | 2.02227  | -0.32809 | 1.47173  |
| C  | 3.25514  | 0.94775  | -0.65640 |
| C  | 0.60416  | -0.88331 | -1.71778 |
| C  | 0.68361  | 0.51920  | -1.68778 |
| C  | 0.39882  | 1.11395  | -0.41322 |
| C  | -0.71725 | 0.54741  | 0.37282  |
| C  | -0.79591 | -0.84101 | 0.34310  |
| C  | 0.25098  | -1.49590 | -0.46905 |
| H  | 0.85365  | -1.45716 | -2.61126 |
| H  | 0.99842  | 1.09878  | -2.55660 |
| H  | 0.57973  | 2.18444  | -0.30485 |
| H  | -1.11615 | 1.11069  | 1.21568  |

|   |          |          |          |
|---|----------|----------|----------|
| H | -1.25792 | -1.39108 | 1.16212  |
| H | 0.30963  | -2.58360 | -0.40684 |
| O | 2.02283  | -0.35254 | 2.61126  |
| O | 3.77740  | -2.53517 | -0.94618 |
| O | 4.02112  | 1.76799  | -0.85400 |

Electronic energy (a.u.) at  $\omega$ B97X-D/def2-SVP: -2804.5864888

Gibbs free energy correction (a.u.) at  $\omega$ B97X-D/def2-SVP: 0.138873

Electronic energy (a.u.) at  $\omega$ B97X-D/def2-TZVPP: -2806.5367142

Electronic energy (a.u.) at DLPNO-CCSD(T)/def2-TZVPP: -2803.51268

Number of imaginary frequencies: 1

### 11 + bis(trifluoromethyl)tetrazine (Product )

|    |          |          |          |
|----|----------|----------|----------|
| C  | -1.87509 | -1.09881 | -0.07626 |
| C  | -1.73888 | 1.30567  | -0.02471 |
| N  | -2.80092 | 0.75675  | 0.83412  |
| N  | -2.87044 | -0.47070 | 0.80782  |
| N  | -1.87697 | 0.75315  | -1.37139 |
| N  | -1.94667 | -0.47721 | -1.39777 |
| C  | -2.19007 | -2.58955 | -0.19271 |
| C  | -1.88330 | 2.82604  | -0.07661 |
| F  | -1.98702 | -3.19665 | 0.97722  |
| F  | -1.40778 | -3.17430 | -1.09874 |
| F  | -3.45079 | -2.78097 | -0.55200 |
| F  | -3.11346 | 3.17374  | -0.42440 |
| F  | -1.61589 | 3.35581  | 1.11770  |
| F  | -1.03776 | 3.35692  | -0.95869 |
| Fe | 2.37455  | -0.13729 | 0.13011  |
| C  | 3.51613  | -1.51189 | -0.10862 |
| C  | 2.20413  | -0.16566 | 1.90304  |
| C  | 3.66455  | 1.10862  | -0.05241 |
| C  | 1.15823  | -0.74140 | -1.40208 |
| C  | 1.23789  | 0.66514  | -1.37193 |
| C  | 0.85781  | 1.25456  | -0.12323 |
| C  | -0.39658 | 0.77886  | 0.58558  |
| C  | -0.48338 | -0.75343 | 0.55273  |
| C  | 0.71102  | -1.33695 | -0.17879 |
| H  | 1.51067  | -1.32155 | -2.25662 |
| H  | 1.65563  | 1.23778  | -2.20175 |
| H  | 1.06587  | 2.31999  | -0.00005 |
| H  | -0.38691 | 1.14242  | 1.62163  |
| H  | -0.51730 | -1.15969 | 1.57228  |
| H  | 0.79721  | -2.42334 | -0.10174 |
| O  | 2.03178  | -0.18009 | 3.03132  |
| O  | 4.20635  | -2.40624 | -0.25608 |

O 4.45165 1.92485 -0.16318

Electronic energy (a.u.) at  $\omega$ B97X-D/def2-SVP: -2804.6531309

Gibbs free energy correction (a.u.) at  $\omega$ B97X-D/def2-SVP: 0.145469

Electronic energy (a.u.) at  $\omega$ B97X-D/def2-TZVPP: -2806.6008712

Electronic energy (a.u.) at DLPNO-CCSD(T)/def2-TZVPP: -2803.57973

Number of imaginary frequencies: 0

### 11 + Danishefsky diene (Reactants - endo)

|    |          |          |          |
|----|----------|----------|----------|
| Fe | 2.18785  | -0.20557 | 0.18920  |
| C  | 3.61806  | -0.97916 | -0.56835 |
| C  | 2.91014  | 0.50785  | 1.66691  |
| C  | 2.22551  | 1.17438  | -0.94901 |
| C  | 0.97768  | -1.83186 | -0.09325 |
| C  | 0.24351  | -0.64530 | -0.27989 |
| C  | 0.21093  | 0.22125  | 0.86484  |
| C  | 0.04485  | -0.41784 | 2.19085  |
| C  | 0.74078  | -1.54790 | 2.37044  |
| C  | 1.56514  | -1.97142 | 1.21211  |
| H  | 1.14549  | -2.54079 | -0.90632 |
| H  | -0.20834 | -0.37203 | -1.23435 |
| H  | -0.23165 | 1.20851  | 0.72312  |
| H  | -0.63772 | 0.01063  | 2.92709  |
| H  | 0.69747  | -2.15833 | 3.27421  |
| H  | 2.25996  | -2.80198 | 1.36129  |
| O  | 3.35455  | 0.95819  | 2.61677  |
| O  | 4.52355  | -1.51767 | -1.01130 |
| O  | 2.17577  | 2.07854  | -1.64921 |
| C  | -2.91719 | 0.39716  | -0.24870 |
| H  | -3.92257 | 0.44574  | 1.60843  |
| C  | -3.38515 | 1.01495  | 0.85070  |
| H  | -3.25563 | 2.08565  | 1.01561  |
| C  | -2.98444 | -1.05664 | -0.47285 |
| H  | -3.15217 | -1.37019 | -1.50569 |
| C  | -2.75636 | -1.94432 | 0.50966  |
| O  | -2.76919 | -3.27884 | 0.42295  |
| O  | -2.30663 | 1.03015  | -1.27910 |
| C  | -3.06004 | -3.85537 | -0.82243 |
| H  | -3.04019 | -4.94304 | -0.68486 |
| H  | -2.30881 | -3.57123 | -1.58009 |
| H  | -4.05775 | -3.55037 | -1.18334 |
| H  | -2.49470 | -1.62052 | 1.52074  |
| Si | -2.21023 | 2.67358  | -1.70188 |
| C  | -1.37434 | 2.64532  | -3.37042 |
| H  | -1.94022 | 2.03253  | -4.08839 |

|   |          |         |          |
|---|----------|---------|----------|
| H | -1.28925 | 3.66389 | -3.78112 |
| H | -0.35748 | 2.23170 | -3.28745 |
| C | -3.94052 | 3.37926 | -1.80533 |
| H | -4.45594 | 3.34740 | -0.83415 |
| H | -3.90855 | 4.42825 | -2.14071 |
| H | -4.54632 | 2.80991 | -2.52724 |
| C | -1.14969 | 3.61505 | -0.47572 |
| H | -0.11440 | 3.24129 | -0.48974 |
| H | -1.11753 | 4.68042 | -0.75638 |
| H | -1.52533 | 3.55267 | 0.55625  |

Electronic energy (a.u.) at  $\omega$ B97X-D/def2-SVP: -2589.1035241

Gibbs free energy correction (a.u.) at  $\omega$ B97X-D/def2-SVP: 0.292670

Electronic energy (a.u.) at  $\omega$ B97X-D/def2-TZVPP: -2590.5471627

Electronic energy (a.u.) at DLPNO-CCSD(T)/def2-TZVPP: -2587.59577

Number of imaginary frequencies: 0

### 11 + Danishefsky diene (Reactants - exo)

|    |          |          |          |
|----|----------|----------|----------|
| Fe | 2.02312  | 0.09892  | -0.25814 |
| C  | 1.75296  | -0.87976 | -1.73844 |
| C  | 2.11468  | -1.17963 | 0.98928  |
| C  | 3.75803  | 0.35692  | -0.64458 |
| C  | 0.52846  | 1.42153  | -0.71548 |
| C  | 1.61018  | 2.10018  | -0.12054 |
| C  | 1.94252  | 1.64838  | 1.20416  |
| C  | 0.81100  | 1.33987  | 2.11370  |
| C  | -0.21590 | 0.69374  | 1.54676  |
| C  | -0.04641 | 0.39007  | 0.10484  |
| H  | 0.21313  | 1.61999  | -1.74142 |
| H  | 2.19117  | 2.84782  | -0.66414 |
| H  | 2.86043  | 2.04078  | 1.64952  |
| H  | 0.83283  | 1.66277  | 3.15594  |
| H  | -1.14238 | 0.41685  | 2.05169  |
| H  | -0.79020 | -0.25836 | -0.36008 |
| O  | 2.14510  | -1.98666 | 1.79693  |
| O  | 1.51330  | -1.51088 | -2.65989 |
| O  | 4.86754  | 0.55212  | -0.83425 |
| C  | -3.59655 | -0.49013 | 0.08431  |
| H  | -4.81587 | -0.59802 | -1.63633 |
| C  | -4.32239 | -1.14820 | -0.83547 |
| H  | -4.46057 | -2.22961 | -0.79898 |
| C  | -3.31356 | 0.95665  | 0.04890  |
| H  | -3.24274 | 1.44957  | 1.02051  |
| C  | -2.99770 | 1.59731  | -1.08697 |
| O  | -2.61082 | 2.87151  | -1.22751 |

|    |          |          |          |
|----|----------|----------|----------|
| O  | -3.00677 | -1.07488 | 1.15522  |
| C  | -2.49340 | 3.65297  | -0.06476 |
| H  | -2.14571 | 4.64365  | -0.38067 |
| H  | -1.76430 | 3.21672  | 0.64120  |
| H  | -3.46623 | 3.75506  | 0.44673  |
| H  | -2.99729 | 1.07982  | -2.05075 |
| Si | -2.46924 | -2.66770 | 1.41206  |
| C  | -1.47964 | -2.56017 | 2.99042  |
| H  | -2.08940 | -2.15242 | 3.81142  |
| H  | -1.12539 | -3.55853 | 3.29250  |
| H  | -0.59762 | -1.91491 | 2.86106  |
| C  | -3.93163 | -3.81873 | 1.63329  |
| H  | -4.49222 | -3.97936 | 0.70053  |
| H  | -3.58519 | -4.80252 | 1.98921  |
| H  | -4.63004 | -3.41530 | 2.38294  |
| C  | -1.39406 | -3.18254 | -0.03242 |
| H  | -0.46384 | -2.59411 | -0.05028 |
| H  | -1.11785 | -4.24561 | 0.05197  |
| H  | -1.90885 | -3.04053 | -0.99487 |

Electronic energy (a.u.) at  $\omega$ B97X-D/def2-SVP: -2589.1040075

Gibbs free energy correction (a.u.) at  $\omega$ B97X-D/def2-SVP: 0.293116

Electronic energy (a.u.) at  $\omega$ B97X-D/def2-TZVPP: -2590.5478186

Electronic energy (a.u.) at DLPNO-CCSD(T)/def2-TZVPP: -2587.59576

Number of imaginary frequencies: 0

### 11 + Danishefsky diene (Transition state - endo)

|    |          |          |          |
|----|----------|----------|----------|
| Fe | 1.64922  | 0.00026  | 0.20078  |
| C  | 2.81521  | -1.21497 | -0.40667 |
| C  | 1.89024  | -0.11614 | 1.97032  |
| C  | 2.71328  | 1.36962  | -0.23315 |
| C  | 0.12466  | -0.71704 | -0.97618 |
| C  | 0.08726  | 0.69260  | -0.91485 |
| C  | -0.07868 | 1.22333  | 0.40310  |
| C  | -1.04001 | 0.54616  | 1.32278  |
| C  | -0.98389 | -0.84735 | 1.26563  |
| C  | -0.02659 | -1.38065 | 0.27700  |
| H  | 0.34111  | -1.24090 | -1.90950 |
| H  | 0.24459  | 1.30887  | -1.80117 |
| H  | 0.02609  | 2.30566  | 0.51800  |
| H  | -1.24426 | 1.03819  | 2.27507  |
| H  | -1.22272 | -1.45942 | 2.13526  |
| H  | 0.16444  | -2.45704 | 0.30180  |
| O  | 2.02319  | -0.18105 | 3.10403  |
| O  | 3.52017  | -2.03593 | -0.77888 |



|    |          |          |          |
|----|----------|----------|----------|
| O  | 3.35175  | 2.28421  | -0.48921 |
| C  | -3.02511 | 0.65546  | -0.65310 |
| H  | -3.46676 | 0.80966  | 1.43257  |
| C  | -2.93105 | 1.25886  | 0.59659  |
| H  | -2.81714 | 2.34283  | 0.66403  |
| C  | -3.09157 | -0.74742 | -0.78143 |
| H  | -2.95943 | -1.14454 | -1.78838 |
| C  | -3.04965 | -1.57661 | 0.32242  |
| O  | -2.97926 | -2.91833 | 0.28386  |
| O  | -2.79322 | 1.33337  | -1.80140 |
| C  | -2.67730 | -3.54108 | -0.93725 |
| H  | -2.55835 | -4.61090 | -0.72666 |
| H  | -1.74147 | -3.15126 | -1.37154 |
| H  | -3.49172 | -3.40871 | -1.67049 |
| H  | -3.41018 | -1.24732 | 1.29518  |
| Si | -3.02380 | 2.96135  | -2.20542 |
| C  | -2.89106 | 2.97853  | -4.06770 |
| H  | -3.66507 | 2.34183  | -4.52252 |
| H  | -3.01148 | 3.99995  | -4.46188 |
| H  | -1.90871 | 2.60252  | -4.39280 |
| C  | -4.71835 | 3.51057  | -1.62941 |
| H  | -4.81446 | 3.46165  | -0.53442 |
| H  | -4.91447 | 4.54894  | -1.94124 |
| H  | -5.50090 | 2.87054  | -2.06562 |
| C  | -1.67495 | 4.03165  | -1.46032 |
| H  | -0.67640 | 3.65565  | -1.73200 |
| H  | -1.76010 | 5.06052  | -1.84639 |
| H  | -1.73013 | 4.08331  | -0.36274 |

Electronic energy (a.u.) at  $\omega$ B97X-D/def2-SVP: -2589.064556

Gibbs free energy correction (a.u.) at  $\omega$ B97X-D/def2-SVP: 0.299676

Electronic energy (a.u.) at  $\omega$ B97X-D/def2-TZVPP: -2590.5041456

Electronic energy (a.u.) at DLPNO-CCSD(T)/def2-TZVPP: -2587.55571

Number of imaginary frequencies: 1

### 11 + Danishefsky diene (Transition state - exo)

|    |          |          |          |
|----|----------|----------|----------|
| Fe | 1.42644  | 0.06479  | -0.34167 |
| C  | 2.37130  | -1.17036 | -1.22673 |
| C  | 2.01421  | -0.14796 | 1.33629  |
| C  | 2.47332  | 1.39700  | -0.92581 |
| C  | -0.33688 | -0.44077 | -1.23428 |
| C  | -0.29737 | 0.95812  | -1.03136 |
| C  | -0.17619 | 1.36908  | 0.33051  |
| C  | -0.91573 | 0.63482  | 1.37579  |
| C  | -1.00287 | -0.74338 | 1.16701  |
| C  | -0.24788 | -1.21471 | -0.03278 |

|    |          |          |          |
|----|----------|----------|----------|
| H  | -0.35579 | -0.87571 | -2.23540 |
| H  | -0.25659 | 1.65659  | -1.86954 |
| H  | 0.02026  | 2.42849  | 0.51331  |
| H  | -0.95425 | 1.05799  | 2.37832  |
| H  | -1.04518 | -1.41909 | 2.02233  |
| H  | -0.13827 | -2.29708 | -0.14641 |
| O  | 2.37106  | -0.29498 | 2.41221  |
| O  | 2.94056  | -2.00292 | -1.76673 |
| O  | 3.10696  | 2.28716  | -1.26412 |
| C  | -3.78876 | -0.72065 | 1.59385  |
| H  | -2.88763 | -0.71124 | -0.34210 |
| C  | -3.00162 | -1.26853 | 0.58707  |
| H  | -2.94890 | -2.35234 | 0.46486  |
| C  | -3.83225 | 0.67357  | 1.79958  |
| H  | -4.30295 | 1.01231  | 2.72358  |
| C  | -3.08476 | 1.53640  | 1.02036  |
| O  | -2.95564 | 2.85683  | 1.22684  |
| O  | -4.33903 | -1.46570 | 2.57985  |
| C  | -3.29787 | 3.37068  | 2.48683  |
| H  | -2.98891 | 4.42298  | 2.49698  |
| H  | -2.77660 | 2.82949  | 3.29594  |
| H  | -4.38504 | 3.31526  | 2.66759  |
| H  | -2.81241 | 1.28947  | -0.00530 |
| Si | -4.46156 | -3.13936 | 2.80133  |
| C  | -5.43607 | -3.30796 | 4.38440  |
| H  | -6.42633 | -2.83738 | 4.28711  |
| H  | -5.58521 | -4.36847 | 4.64211  |
| H  | -4.91069 | -2.82382 | 5.22176  |
| C  | -5.38402 | -3.91367 | 1.36598  |
| H  | -4.83889 | -3.82008 | 0.41516  |
| H  | -5.55189 | -4.98631 | 1.55463  |
| H  | -6.36727 | -3.43447 | 1.23919  |
| C  | -2.75035 | -3.88097 | 3.00464  |
| H  | -2.19449 | -3.35291 | 3.79535  |
| H  | -2.82573 | -4.94061 | 3.29784  |
| H  | -2.15402 | -3.83221 | 2.08114  |

Electronic energy (a.u.) at  $\omega$ B97X-D/def2-SVP: -2589.060056

Gibbs free energy correction (a.u.) at  $\omega$ B97X-D/def2-SVP: 0.297598

Electronic energy (a.u.) at  $\omega$ B97X-D/def2-TZVPP: -2590.5007058

Electronic energy (a.u.) at DLPNO-CCSD(T)/def2-TZVPP: -2587.55144

Number of imaginary frequencies: 1

### 11 + Danishefsky diene (Product - endo)

|    |         |          |         |
|----|---------|----------|---------|
| Fe | 2.10983 | -0.49019 | 0.94343 |
|----|---------|----------|---------|

|    |          |          |          |
|----|----------|----------|----------|
| C  | 3.34297  | -1.75549 | 0.62724  |
| C  | 1.89007  | -0.66219 | 2.69733  |
| C  | 3.29281  | 0.85625  | 0.87256  |
| C  | 0.94824  | -1.08265 | -0.63110 |
| C  | 0.92384  | 0.32399  | -0.50499 |
| C  | 0.47727  | 0.78466  | 0.77346  |
| C  | -0.76888 | 0.18560  | 1.41062  |
| C  | -0.73226 | -1.35640 | 1.28177  |
| C  | 0.52129  | -1.78447 | 0.53775  |
| H  | 1.37111  | -1.57223 | -1.51126 |
| H  | 1.32098  | 0.98103  | -1.28134 |
| H  | 0.61011  | 1.85377  | 0.97594  |
| H  | -0.75456 | 0.45355  | 2.47759  |
| H  | -0.68710 | -1.80720 | 2.28439  |
| H  | 0.69847  | -2.86352 | 0.55455  |
| O  | 1.69700  | -0.76859 | 3.81934  |
| O  | 4.09563  | -2.59091 | 0.42712  |
| O  | 4.01266  | 1.74261  | 0.83476  |
| C  | -2.41876 | 0.19956  | -0.50991 |
| H  | -2.88298 | 0.69269  | 1.51215  |
| C  | -2.04176 | 0.82542  | 0.80808  |
| H  | -1.88930 | 1.90989  | 0.71579  |
| C  | -2.40649 | -1.13632 | -0.60000 |
| H  | -2.72318 | -1.61750 | -1.52487 |
| C  | -2.02017 | -1.92851 | 0.62057  |
| O  | -1.89697 | -3.32338 | 0.44411  |
| O  | -2.81233 | 0.96614  | -1.54560 |
| C  | -1.62890 | -3.84056 | -0.82557 |
| H  | -1.30373 | -4.88101 | -0.68280 |
| H  | -0.82617 | -3.29812 | -1.35564 |
| H  | -2.52266 | -3.85219 | -1.47649 |
| H  | -2.82265 | -1.81853 | 1.37619  |
| Si | -2.72885 | 2.61024  | -1.91829 |
| C  | -3.40387 | 2.71026  | -3.65530 |
| H  | -4.43828 | 2.33612  | -3.69495 |
| H  | -3.40211 | 3.75020  | -4.01840 |
| H  | -2.79806 | 2.10483  | -4.34658 |
| C  | -3.80228 | 3.60369  | -0.74472 |
| H  | -3.41497 | 3.61415  | 0.28507  |
| H  | -3.86834 | 4.64925  | -1.08683 |
| H  | -4.82396 | 3.19359  | -0.71817 |
| C  | -0.94615 | 3.18970  | -1.86750 |
| H  | -0.32836 | 2.58706  | -2.55135 |
| H  | -0.87580 | 4.24203  | -2.18673 |
| H  | -0.50987 | 3.11360  | -0.86025 |

Electronic energy (a.u.) at  $\omega$ B97X-D/def2-SVP: -2589.1591695  
Gibbs free energy correction (a.u.) at  $\omega$ B97X-D/def2-SVP: 0.305592  
Electronic energy (a.u.) at  $\omega$ B97X-D/def2-TZVPP: -2590.5936142  
Electronic energy (a.u.) at DLPNO-CCSD(T)/def2-TZVPP: -2587.64376  
Number of imaginary frequencies: 0

**11 + Danishefsky diene (Product - exo)**

|    |          |          |          |
|----|----------|----------|----------|
| Fe | 2.22736  | 0.62397  | -1.31400 |
| C  | 3.25426  | -0.53544 | -2.22117 |
| C  | 2.61822  | 0.19207  | 0.36184  |
| C  | 3.34209  | 2.00685  | -1.57987 |
| C  | 0.57955  | 0.25324  | -2.46628 |
| C  | 0.62631  | 1.62036  | -2.10949 |
| C  | 0.66324  | 1.86144  | -0.70053 |
| C  | -0.29118 | 1.11417  | 0.21149  |
| C  | -0.34559 | -0.38364 | -0.17263 |
| C  | 0.57610  | -0.64575 | -1.35220 |
| H  | 0.66153  | -0.07124 | -3.50595 |
| H  | 0.74783  | 2.40473  | -2.85967 |
| H  | 0.86454  | 2.89137  | -0.39023 |
| H  | 0.09443  | 1.17704  | 1.23955  |
| H  | 0.03264  | -0.96348 | 0.68340  |
| H  | 0.71604  | -1.70695 | -1.58699 |
| O  | 2.81468  | -0.08796 | 1.45324  |
| O  | 3.87946  | -1.30462 | -2.78861 |
| O  | 4.02537  | 2.90987  | -1.72602 |
| C  | -2.75894 | -0.37981 | 0.56909  |
| H  | -2.09267 | -0.56736 | -1.45099 |
| C  | -1.77169 | -0.89926 | -0.44703 |
| H  | -1.77409 | -1.99902 | -0.47313 |
| C  | -2.70450 | 0.91366  | 0.90660  |
| H  | -3.44535 | 1.35366  | 1.57708  |
| C  | -1.68159 | 1.79369  | 0.23255  |
| O  | -1.63535 | 3.09728  | 0.76436  |
| O  | -3.71490 | -1.21510 | 1.03197  |
| C  | -1.21359 | 3.22672  | 2.09128  |
| H  | -1.50813 | 4.22920  | 2.43114  |
| H  | -0.11614 | 3.13934  | 2.20061  |
| H  | -1.68306 | 2.48131  | 2.75926  |
| H  | -1.98577 | 1.95406  | -0.81832 |
| Si | -3.51807 | -2.64934 | 1.91051  |
| C  | -4.95064 | -2.69818 | 3.10642  |
| H  | -5.90865 | -2.65399 | 2.56576  |
| H  | -4.93793 | -3.62504 | 3.70154  |
| H  | -4.91339 | -1.84371 | 3.79917  |

|   |          |          |         |
|---|----------|----------|---------|
| C | -3.59685 | -4.11229 | 0.74225 |
| H | -2.74479 | -4.13265 | 0.04553 |
| H | -3.59058 | -5.05895 | 1.30631 |
| H | -4.52156 | -4.08111 | 0.14519 |
| C | -1.86838 | -2.57260 | 2.79554 |
| H | -1.78687 | -1.64766 | 3.38765 |
| H | -1.74843 | -3.42796 | 3.47916 |
| H | -1.02688 | -2.59218 | 2.08526 |

Electronic energy (a.u.) at  $\omega$ B97X-D/def2-SVP: -2589.1623904

Gibbs free energy correction (a.u.) at  $\omega$ B97X-D/def2-SVP: 0.303967

Electronic energy (a.u.) at  $\omega$ B97X-D/def2-TZVPP: -2590.5980573

Electronic energy (a.u.) at DLPNO-CCSD(T)/def2-TZVPP: -2587.64814

Number of imaginary frequencies: 0
